# Supplementary material for: Trends in the contribution of greenhouse gas emissions from food and beverage purchases in Mexico: 1989–2020
Source: PubMed Central journal article supplement (PMC11102158; doi:10.1186/s12937-024-00955-z), 2024-05-18
Supplement: 12937_2024_955_MOESM1_ESM.pdf [file 12937_2024_955_MOESM1_ESM.pdf]

| Supplementary table | Description                                                                                                              | Page |
|---------------------|--------------------------------------------------------------------------------------------------------------------------|------|
| 1                   | Overtime food items and GHGE factors                                                                                     | 2    |
| 2                   | Descriptive characteristics in Mexican households, 1989, 2020 ENIGHS.                                                    | 8    |
| 3                   | Purchases by food group per equivalent adult in kilograms, 1989, 2020 ENIGHS                                             | 9    |
| 4                   | GHGE by food group per equivalent adult in kilograms of CO <sub>2</sub> , 1989, 2020 ENIGHS                              | 11   |
| 5                   | Purchases by educational level of the head of household in kilograms per equivalent adult, 1989, 2020 ENIGHS             | 13   |
| 6                   | Purchases by urbanicity in kilograms per equivalent adult, 1992, 2020 ENIGHS                                             | 14   |
| 7                   | GHGE by educational level of the head of household per equivalent adult in kg of CO <sub>2</sub> , 1989, 2020 ENIGHS     | 15   |
| 8                   | GHGE by urbanicity per equivalent adult in kg of CO <sub>2</sub> , 1992, 2020 ENIGHS                                     | 16   |
| 9                   | Relative contribution of GHGE by food group in Mexican households, 1989, 2020 ENIGHS                                     | 17   |
| 10                  | Relative contribution of GHGE by food group among households with no formal education, 1989, 2020 ENIGHS.                | 19   |
| 11                  | Relative contribution of GHGE by food group among households with completed pre elementary education, 1989, 2020 ENIGHS. | 21   |
| 12                  | Relative contribution of GHGE by food group among households with completed elementary education, 1989, 2020 ENIGHS.     | 23   |
| 13                  | Relative contribution of GHGE by food group among households with completed middle school, 1989, 2020 ENIGHS.            | 25   |
| 14                  | Relative contribution of GHGE by food group among households with completed high schooll education, 1989, 2020 ENIGHS.   | 27   |
| 15                  | Relative contribution of GHGE by food group among households with completed college education, 1989, 2020 ENIGHS.        | 29   |
| 16                  | Relative contribution of GHGE by food group among households living in rural aeras, 1992, 2020 ENIGHS.                   | 31   |
| 17                  | Relative contribution of GHGE by food group among households living in small aeras, 1992, 2020 ENIGHS.                   | 33   |
| 18                  | Relative contribution of GHGE by food group among households living in medium aeras, 1992, 2020 ENIGHS.                  | 35   |
| 19                  | Relative contribution of GHGE by food group among households living in metropolitan aeras, 1992, 2020 ENIGHS.            | 37   |

**Supplementary Table 1. Overtime food items and GHGE factors**

|    | Food                                                                                        | Food group     | 1989, 1992 | 1994, 2000 | 2002, 2004 | 2006, 2020 | Factor | SHARP ID                      |
|----|---------------------------------------------------------------------------------------------|----------------|------------|------------|------------|------------|--------|-------------------------------|
| 1  | Corn in grain (of all types and colors)                                                     | Corn           | YES        | YES        | YES        | YES        | 0.522  | A000T                         |
| 2  | Corn flour, cornstarch, starch, nixtamalized for tortillas, for atole and flour for tamales | Corn           | YES        | YES        | YES        | YES        | 0.992  | A002Q                         |
| 3  | Corn dough (of all types and colors)                                                        | Corn           | YES        | YES        | YES        | YES        | 0.992  | A002Q                         |
| 4  | Corn tortilla (of all types and colors)                                                     | Corn           | YES        | YES        | YES        | YES        | 0.419  | Guzman Soria <sup>1</sup>     |
| 5  | Tostadas, raspadas, tostitos, tortilla chips, tlayudas                                      | Corn           | NO         | YES        | YES        | YES        | 0.419  | Guzman Soria <sup>1</sup>     |
| 6  | Other corn products (except cereal)                                                         | Corn           | YES        | YES        | YES        | YES        | 0.419  | Guzman Soria <sup>1</sup>     |
| 7  | Wheat flour                                                                                 | Grains         | YES        | YES        | YES        | YES        | 0.568  | A003X                         |
| 8  | Flour tortilla                                                                              | Grains         | YES        | YES        | YES        | YES        | 0.419  | Guzman Soria <sup>1</sup>     |
| 9  | Pasta for soup                                                                              | Grains         | YES        | YES        | YES        | YES        | 0.456  | A007L                         |
| 10 | Sweet cookies                                                                               | Sweet or salty | YES        | YES        | YES        | YES        | 3.124  | A009V                         |
| 11 | Pretzels                                                                                    | Sweet or salty | YES        | YES        | YES        | YES        | 0.966  | A005Y                         |
| 12 | White bread: bolillo, telera, baguette, etc.                                                | Grains         | YES        | YES        | YES        | YES        | 0.966  | A004Y                         |
| 13 | Sweet bread in pieces (of all kinds)                                                        | Sweet or salty | YES        | YES        | YES        | YES        | 3.124  | A009V                         |
| 14 | Packaged sweet bread                                                                        | Sweet or salty | NO         | NO         | NO         | YES        | 3.124  | A009V                         |
| 15 | Bread for sandwich, hamburger, hot dog and toast                                            | Grains         | NO         | YES        | YES        | YES        | 0.966  | A0BB2                         |
| 16 | Cakes and cakes in pieces or in bulk, homemade cake                                         | Sweet or salty | YES        | YES        | YES        | YES        | 12.428 | A00AN                         |
| 17 | Packaged cakes and cupcakes                                                                 | Sweet or salty | NO         | NO         | NO         | YES        | 12.428 | A00AN                         |
| 18 | Wheat grain, other wheat products (except cereal)                                           | Grains         | YES        | YES        | YES        | YES        | 1.062  | A001D                         |
| 19 | Grain rice                                                                                  | Grains         | YES        | YES        | YES        | YES        | 1.062  | A001D                         |
| 20 | Other rice products                                                                         | Grains         | YES        | YES        | YES        | YES        | 0.845  | A003F                         |
| 21 | Corn cereal, wheat, rice, oats, granola, etc.                                               | Grains         | NO         | YES        | YES        | YES        | 1.044  | A00CV                         |
| 22 | Snacks: chips, popcorn, cheetos, doritos, etc. (except paps)                                | Sweet or salty | NO         | YES        | YES        | YES        | 0.667  | A00DC                         |
| 23 | Instant soup                                                                                | Fast food      | NO         | NO         | YES        | YES        | 6.321  | A0B9R                         |
| 24 | Other cereals (except cereal)                                                               | Grains         | YES        | NO         | YES        | YES        | 1.4    | Average (barley and amaranth) |
| 25 | Beef Steak (anywhere pulled)                                                                | Beef           | YES        | YES        | YES        | YES        | 34.041 | A020Z                         |
| 26 | Flank steak, fillet                                                                         | Beef           | NO         | NO         | YES        | YES        | 34.041 | A020Z                         |
| 27 | Breaded beef                                                                                | Beef           | NO         | NO         | YES        | YES        | 34.041 | A020Z                         |
| 28 | Beef shank                                                                                  | Beef           | NO         | NO         | YES        | YES        | 34.041 | A020Z                         |
| 29 | Beef Rib Chop                                                                               | Beef           | YES        | YES        | YES        | YES        | 34.041 | A020Z                         |
| 30 | Agujas, aldilla, shank, tithe, backbone, beef strip for roasting, remnant, tampiqueña       | Beef           | NO         | NO         | YES        | YES        | 34.041 | A020Z                         |
| 31 | Beef stew                                                                                   | Beef           | YES        | YES        | YES        | YES        | 34.041 | A020Z                         |
| 32 | Special cuts of beef                                                                        | Beef           | YES        | YES        | YES        | YES        | 34.041 | A020Z                         |
| 33 | Beef Burgers for Grilling                                                                   | Beef           | NO         | NO         | YES        | YES        | 34.041 | A049S                         |
| 34 | Ground beef                                                                                 | Beef           | NO         | NO         | YES        | YES        | 34.041 | A049S                         |
| 35 | Chunk beef pulp                                                                             | Beef           | YES        | YES        | YES        | YES        | 34.041 | A020Z                         |
| 36 | Meat from other parts of the beef                                                           | Beef           | NO         | NO         | YES        | YES        | 34.041 | A020Z                         |
| 37 | Beef innards                                                                                | Beef           | YES        | YES        | YES        | YES        | 34.041 | A01ZM                         |
| 38 | Pork steak (from whatever part is taken)                                                    | Pork           | YES        | YES        | YES        | YES        | 12.101 | A01ZP                         |
| 39 | Piece of pork leg                                                                           | Pork           | NO         | NO         | YES        | YES        | 12.101 | A021G                         |
| 40 | Chunk pork pulp                                                                             | Pork           | YES        | YES        | YES        | YES        | 12.101 | A01RG                         |
| 41 | Ground pork                                                                                 | Pork           | NO         | NO         | YES        | YES        | 12.101 | A01RG                         |

|    |                                                                   |         |     |     |     |     |        |                            |
|----|-------------------------------------------------------------------|---------|-----|-----|-----|-----|--------|----------------------------|
| 42 | Rib and pork chop                                                 | Pork    | YES | YES | YES | YES | 12.101 | A01ZP                      |
| 43 | Pork shoulder                                                     | Pork    | NO  | NO  | YES | YES | 12.101 | A01RG                      |
| 44 | Pork knuckle                                                      | Pork    | NO  | NO  | YES | YES | 12.101 | A01ZP                      |
| 45 | Meat from other parts of the pork                                 | Pork    | NO  | NO  | YES | YES | 12.101 | A01RG                      |
| 46 | Pork offal                                                        | Pork    | YES | YES | YES | YES | 12.101 | A01YM                      |
| 47 | Beef enchilada                                                    | Beef    | NO  | YES | YES | YES | 18.566 | A01QR                      |
| 48 | Pork rind                                                         | Beef    | NO  | NO  | YES | YES | 12.101 | A01RG                      |
| 49 | Chorizo with any seasoning and color and sausage                  | Beef    | YES | YES | YES | YES | 12.101 | A024J                      |
| 50 | Smoked Pork Chop                                                  | Beef    | NO  | NO  | YES | YES | 18.566 | A01QR                      |
| 51 | Machaca and dried meat                                            | Beef    | YES | YES | YES | YES | 18.566 | A01QR                      |
| 52 | Pork ham                                                          | Beef    | YES | YES | YES | YES | 10.24  | A022T                      |
| 53 | Mortadella, pork cheese and salami, assorted meat bologna         | Beef    | YES | YES | YES | YES | 12.101 | A024X                      |
| 54 | Processed lardo (bacon)                                           | Beef    | YES | YES | YES | YES | 10.245 | A022X                      |
| 55 | Sausages and salami                                               | Beef    | YES | YES | YES | YES | 12.101 | A024F                      |
| 56 | Other processed meats, leather                                    | Beef    | NO  | NO  | YES | YES | 12.101 | A01RG                      |
| 57 | Bone, in chicken leg, thigh or breast                             | Chicken | YES | YES | YES | YES | 8.582  | A01SP                      |
| 58 | Boneless chicken leg, thigh or breast                             | Chicken | NO  | NO  | YES | YES | 8.582  | A01SP                      |
| 59 | Whole chicken or pieces (except leg, thigh and breast)            | Chicken | YES | YES | YES | YES | 8.582  | A01SP                      |
| 60 | Viscera and other parts of the chicken                            | Chicken | YES | YES | YES | YES | 8.582  | A020F                      |
| 61 | Other birds                                                       | Chicken | YES | YES | YES | YES | 8.582  | A01SQ                      |
| 62 | Chicken chorizo, ham and nugget, sausage, mortadella, etc.        | Beef    | NO  | NO  | YES | YES | 12.101 | A024F                      |
| 63 | Sheep and ram                                                     | Others  | YES | YES | YES | YES | 27.389 | A01RL                      |
| 64 | Goat and kid                                                      | Others  | YES | YES | YES | YES | 27.389 | A01RL                      |
| 65 | Other meats: horse, rabbit, iguana, wild boar, frog, turtle, deer | Others  | YES | YES | YES | YES | 10.341 | Average (beef and chicken) |
| 66 | Clean and Uncleaned Whole Fish                                    | Seafood | YES | YES | YES | YES | 11.621 | A026V                      |
| 67 | Fish steak                                                        | Seafood | NO  | NO  | YES | YES | 11.621 | A026V                      |
| 68 | Canned tuna                                                       | Seafood | YES | YES | YES | YES | 7.931  | A0FBT                      |
| 69 | Processed cod and salmon                                          | Seafood | NO  | NO  | YES | YES | 4.648  | A0C75                      |
| 70 | Smoked, dried fish, nuggets, sardines, etc.                       | Seafood | NO  | NO  | YES | YES | 17.524 | A02KH                      |
| 71 | Eels, eels, fish roe, manta ray, gar, etc.                        | Seafood | NO  | NO  | YES | YES | 8.375  | A02DQ                      |
| 72 | Fresh shrimp                                                      | Seafood | NO  | NO  | NO  | YES | 15.975 | A02GB                      |
| 73 | Fresh seafood                                                     | Seafood | NO  | NO  | YES | YES | 11.621 | A026T                      |
| 74 | Processed seafood                                                 | Seafood | NO  | NO  | YES | YES | 11.621 | A026T                      |
| 75 | Pasteurized cow's milk                                            | Dairy   | YES | YES | YES | YES | 1.585  | A02LT                      |
| 76 | Condensed milk                                                    | Dairy   | YES | YES | YES | YES | 4.502  | A02PG                      |
| 77 | Evaporated milk                                                   | Dairy   | YES | YES | YES | YES | 5.586  | A02PF                      |
| 78 | Whole or skimmed powdered milk                                    | Dairy   | YES | YES | YES | YES | 7.764  | A02PJ                      |
| 79 | Modified or formula milk                                          | Dairy   | YES | YES | YES | YES | 7.764  | A02PJ                      |
| 80 | Unpasteurized milk (rough milk)                                   | Dairy   | YES | YES | YES | YES | 1.585  | A02LV                      |
| 81 | Other milk: donkey, goat, soy                                     | Dairy   | YES | YES | YES | YES | 3.046  | A02MB                      |
| 82 | Sliced or spreadable yellow cheese                                | Dairy   | YES | YES | YES | YES | 13.142 | A02QE                      |
| 83 | Aged cheese and cotija                                            | Dairy   | YES | YES | YES | YES | 13.142 | A02QE                      |
| 84 | Chihuahua cheese                                                  | Dairy   | YES | YES | YES | YES | 13.142 | A02QE                      |
| 85 | Fresh cheese                                                      | Dairy   | YES | YES | YES | YES | 13.142 | A02QE                      |
| 86 | Manchego cheese                                                   | Dairy   | YES | YES | YES | YES | 13.142 | A02QE                      |
| 87 | Oaxaca or asadero cheese                                          | Dairy   | YES | YES | YES | YES | 13.142 | A02QE                      |
| 88 | Other cheeses                                                     | Dairy   | YES | YES | YES | YES | 13.142 | A02QE                      |

|     |                                                               |            |     |     |     |     |        |                                           |
|-----|---------------------------------------------------------------|------------|-----|-----|-----|-----|--------|-------------------------------------------|
| 89  | Cream                                                         | Oil        | YES | YES | YES | YES | 10.682 | A02MK                                     |
| 90  | Butter                                                        | Oil        | YES | YES | YES | YES | 1.59   | A02MV                                     |
| 91  | Fermented milk drinks                                         | Beverages  | YES | YES | YES | YES | 1.73   | A02NE                                     |
| 92  | Other milk derivatives                                        | Oil        | NO  | NO  | YES | YES | 2.2    | HEAlabel <sup>2</sup>                     |
| 93  | White and red chicken egg                                     | Eggs       | YES | YES | YES | YES | 1.903  | A031G                                     |
| 94  | Other eggs: quail, leg, turkey, etc.                          | Eggs       | YES | YES | YES | YES | 1.903  | A031G                                     |
| 95  | Vegetable oil: canola, safflower, sunflower, corn, etc.       | Oil        | YES | YES | YES | YES | 3.518  | A036Y                                     |
| 96  | Coconut, olive, soy oil                                       | Oil        | YES | YES | YES | YES | 3.791  | A036P                                     |
| 97  | Margarine                                                     | Oil        | YES | YES | YES | YES | 4.26   | A0FIG                                     |
| 98  | Lard                                                          | Oil        | YES | YES | YES | YES | 11.515 | A037V                                     |
| 99  | Vegetable shortening                                          | Oil        | YES | YES | YES | YES | 3.858  | A036N                                     |
| 100 | Other oils: cod, shark, turtle, jerk                          | Oil        | NO  | NO  | YES | YES | 4.954  | A038Q                                     |
| 101 | Beets and sweet potatoes                                      | Grains     | YES | YES | YES | YES | 0.513  | A00QG                                     |
| 102 | Potato                                                        | Grains     | YES | YES | YES | YES | 0.503  | A00ZT                                     |
| 103 | Radish                                                        | Grains     | NO  | NO  | YES | YES | 0.173  | A00QV                                     |
| 104 | Other tubers                                                  | Grains     | YES | YES | YES | YES | 0.503  | A00ZT                                     |
| 105 | Flour for mashed potatoes                                     | Grains     | YES | YES | YES | YES | 0.939  | A011G                                     |
| 106 | Potato chips in bag or in bulk                                | Grains     | NO  | YES | YES | YES | 1.855  | A00FC                                     |
| 107 | Chard, spinach and purslane, quintolines, quelites and pipica | Vegetables | YES | YES | YES | YES | 0.6525 | A00MJ                                     |
| 108 | Avocado                                                       | Vegetables | YES | YES | YES | YES | 1.34   | A0ILB                                     |
| 109 | Garlic                                                        | Vegetables | NO  | YES | YES | YES | 0.382  | A00GZ                                     |
| 110 | Broccoli                                                      | Vegetables | NO  | NO  | YES | YES | 0.985  | A00FN                                     |
| 111 | Zucchini and pumpkin                                          | Vegetables | YES | YES | YES | YES | 0.581  | A00KH                                     |
| 112 | Onion                                                         | Vegetables | YES | YES | YES | YES | 0.423  | A00HC                                     |
| 113 | Squash                                                        | Vegetables | YES | YES | YES | YES | 0.538  | A00JS                                     |
| 114 | Pea                                                           | Vegetables | YES | YES | YES | YES | 0.243  | A01DP                                     |
| 115 | Jalapeno pepper                                               | Vegetables | YES | YES | YES | YES | 0.66   | CLUNE STEPHEN <sup>3</sup>                |
| 116 | Poblano pepper                                                | Vegetables | YES | YES | YES | YES | 0.66   | CLUNE STEPHEN <sup>3</sup>                |
| 117 | Serrano chili                                                 | Vegetables | YES | YES | YES | YES | 0.66   | CLUNE STEPHEN <sup>3</sup>                |
| 118 | Other chillies                                                | Vegetables | YES | YES | YES | YES | 0.66   | CLUNE STEPHEN <sup>3</sup>                |
| 119 | Cilantro                                                      | Vegetables | YES | YES | YES | YES | 0.729  | A00YE                                     |
| 120 | Cabbage and cabbage                                           | Vegetables | YES | YES | YES | YES | 0.452  | A00GC                                     |
| 121 | Green bean                                                    | Vegetables | YES | YES | YES | YES | 0.44   | HEAlabel <sup>2</sup>                     |
| 122 | Corn                                                          | Corn       | YES | YES | YES | YES | 2.559  | A00KP                                     |
| 123 | Epazote                                                       | Vegetables | YES | YES | YES | YES | 0.729  | A00YE                                     |
| 124 | Tomato                                                        | Vegetables | YES | YES | YES | YES | 0.919  | A0DMX                                     |
| 125 | Lettuce                                                       | Vegetables | YES | YES | YES | YES | 326    | A00KX                                     |
| 126 | Prickly pear                                                  | Vegetables | YES | YES | YES | YES | 0.562  | VERGEL RANGEL <sup>4</sup>                |
| 127 | Cucumber                                                      | Vegetables | YES | YES | YES | YES | 3.861  | A00JM                                     |
| 128 | Parsley and mint                                              | Vegetables | YES | YES | YES | YES | 0.729  | A00YE                                     |
| 129 | Green tomato                                                  | Vegetables | YES | YES | YES | YES | 0.919  | A00HQ                                     |
| 130 | Carrot                                                        | Vegetables | YES | YES | YES | YES | 0.391  | A00QH                                     |
| 131 | Other vegetables, papalo, olives, squash flower, chaya        | Vegetables | NO  | NO  | YES | YES | 1.363  | A00FJ                                     |
| 132 | Corn, soybean, wheat, alfalfa sprouts                         | Vegetables | NO  | NO  | YES | YES | 0.59   | Average (wheat germ and soybeans sprouts) |
| 133 | Packaged chillies                                             | Vegetables | YES | YES | YES | YES | 0.66   | CLUNE STEPHEN <sup>3</sup>                |
| 134 | Dried or powdered chili                                       | Vegetables | YES | YES | YES | YES | 0.66   | CLUNE STEPHEN <sup>3</sup>                |
| 135 | Packaged vegetables and legumes, olives, pickled vegetables   | Vegetables | YES | YES | YES | YES | 2.191  | A0ETQ                                     |

|     |                                                                                     |            |     |     |     |     |       |                            |
|-----|-------------------------------------------------------------------------------------|------------|-----|-----|-----|-----|-------|----------------------------|
| 136 | Frozen vegetables and legumes                                                       | Vegetables | NO  | YES | YES | YES | 1.363 | A00FJ                      |
| 137 | Bean grain                                                                          | Legumes    | YES | YES | YES | YES | 1.109 | A012S                      |
| 138 | Chickpea grain                                                                      | Legumes    | YES | YES | YES | YES | 1.141 | A013M                      |
| 139 | Yellow or green broad beans Lentils                                                 | Legumes    | YES | YES | YES | YES | 0.961 | A013H                      |
| 140 | Lentil grain                                                                        | Legumes    | NO  | NO  | YES | YES | 0.669 | A013Q                      |
| 141 | Other grain legumes                                                                 | Legumes    | NO  | NO  | YES | YES | 0.476 | A012G                      |
| 142 | Processed bean                                                                      | Legumes    | YES | YES | YES | YES | 1.228 | A01BB                      |
| 143 | Other processed legumes                                                             | Legumes    | YES | YES | YES | YES | 1.228 | A01BB                      |
| 144 | Bulk seeds                                                                          | Seeds      | YES | YES | YES | YES | 1.41  | CLUNE STEPHEN <sup>3</sup> |
| 145 | Packaged seeds                                                                      | Seeds      | YES | YES | YES | YES | 1.41  | CLUNE STEPHEN <sup>3</sup> |
| 146 | Processed seeds, textured soybeans                                                  | Seeds      | NO  | NO  | YES | YES | 1.41  | CLUNE STEPHEN <sup>3</sup> |
| 147 | Custard apple, custard apple, soursop                                               | Fruits     | NO  | NO  | YES | YES | 0.83  | Average (all fruits)       |
| 148 | Cherry, raspberry, strawberry, blackberry                                           | Fruits     | YES | YES | YES | YES | 0.51  | A01EA                      |
| 149 | Apricot, peach, peach                                                               | Fruits     | YES | YES | YES | YES | 0.323 | A01GL                      |
| 150 | Chicozapote and mamey                                                               | Fruits     | YES | YES | YES | YES | 0.83  | Average (all fruits)       |
| 151 | Plum and jobo                                                                       | Fruits     | NO  | NO  | YES | YES | 0.184 | A01GQ                      |
| 152 | Guava                                                                               | Fruits     | YES | YES | YES | YES | 0.28  | CLUNE STEPHEN <sup>3</sup> |
| 153 | Lime                                                                                | Fruits     | NO  | NO  | YES | YES | 0.347 | A01CA                      |
| 154 | Lemon                                                                               | Fruits     | YES | YES | YES | YES | 0.488 | A01BY                      |
| 155 | Tangerine, nectarine, tangerine                                                     | Fruits     | YES | YES | YES | YES | 0.46  | A01CD                      |
| 156 | Pink grapefruit                                                                     | Fruits     | NO  | NO  | YES | YES | 0.992 | A01CY                      |
| 157 | Mango                                                                               | Fruits     | YES | YES | YES | YES | 1.438 | A01LF                      |
| 158 | Apple and peron                                                                     | Fruits     | YES | YES | YES | YES | 0.742 | A01DJ                      |
| 159 | Melon                                                                               | Fruits     | YES | YES | YES | YES | 0.381 | A00KF                      |
| 160 | Orange                                                                              | Fruits     | YES | YES | YES | YES | 0.738 | A01CR                      |
| 161 | Papaya                                                                              | Fruits     | YES | YES | YES | YES | 1.474 | A01LG                      |
| 162 | Pear                                                                                | Fruits     | YES | YES | YES | YES | 0.243 | A01DP                      |
| 163 | Pineapple                                                                           | Fruits     | YES | YES | YES | YES | 0.466 | A01LP                      |
| 164 | Pitahaya and tuna                                                                   | Fruits     | NO  | NO  | YES | YES | 2.15  | CLUNE STEPHEN <sup>3</sup> |
| 165 | Plantain and castilla                                                               | Fruits     | NO  | NO  | YES | YES | 0.72  | CLUNE STEPHEN <sup>3</sup> |
| 166 | Green banana and tabasco                                                            | Fruits     | YES | YES | YES | YES | 0.72  | CLUNE STEPHEN <sup>3</sup> |
| 167 | Other plantains (Chiapas, Dominico, Guinea, Manzano, Dorado, Portalimón and Roatan) | Fruits     | YES | YES | YES | YES | 0.72  | CLUNE STEPHEN <sup>3</sup> |
| 168 | Watermelon                                                                          | Fruits     | YES | YES | YES | YES | 0.367 | A00KJ                      |
| 169 | Grape                                                                               | Fruits     | YES | YES | YES | YES | 0.991 | A01CY                      |
| 170 | Other fruits: garambullo, pomegranate, fig, jicama, kiwi, etc., fruit arrangement   | Fruits     | NO  | NO  | YES | YES | 0.509 | A01HG                      |
| 171 | Fruits in syrup and preserves                                                       | Fruits     | YES | YES | YES | YES | 2.435 | A01PS                      |
| 172 | Crystallized, enchiladas and dried fruits                                           | Fruits     | YES | YES | YES | YES | 1.964 | A01MA                      |
| 173 | White and brown sugar                                                               | Others     | YES | YES | YES | YES | 0.6   | A032J                      |
| 174 | Honey bee                                                                           | Others     | YES | YES | YES | YES | 1.181 | A033J                      |
| 175 | Other sugars and honeys                                                             | Others     | YES | YES | YES | YES | 0.6   | A032Q                      |
| 176 | Ground roasted coffee beans                                                         | Beverages  | YES | YES | YES | YES | 0.572 | A03GN                      |
| 177 | Instant roasted coffee, cappuccino                                                  | Beverages  | YES | YES | YES | YES | 0.572 | A03KE                      |
| 178 | Flower and leaves for tea                                                           | Beverages  | YES | YES | YES | YES | 0.699 | A03LC                      |
| 179 | Soluble tea (any flavor)                                                            | Beverages  | YES | YES | YES | YES | 0.699 | A03LB                      |
| 180 | Tablet chocolate                                                                    | Others     | YES | YES | YES | YES | 5.994 | AOEQD                      |
| 181 | Powdered chocolate                                                                  | Others     | NO  | NO  | YES | YES | 5.994 | AOEQD                      |

|     |                                                                                                                                            |                |     |     |     |     |        |                       |
|-----|--------------------------------------------------------------------------------------------------------------------------------------------|----------------|-----|-----|-----|-----|--------|-----------------------|
| 182 | Other chocolates                                                                                                                           | Others         | YES | YES | YES | YES | 5.994  | AOEQD                 |
| 183 | Cinnamon                                                                                                                                   | Others         | YES | YES | YES | YES | 1.6    | HEAlabel <sup>2</sup> |
| 184 | Clove                                                                                                                                      | Others         | NO  | NO  | YES | YES | 1.6    | HEAlabel <sup>2</sup> |
| 185 | Scented herbs                                                                                                                              | Others         | NO  | NO  | YES | YES | 0.1    | HEAlabel <sup>2</sup> |
| 186 | Chicken, tomato, shrimp and beef concentrates                                                                                              | Others         | YES | YES | YES | YES | 0.1    | HEAlabel <sup>2</sup> |
| 187 | Mayonnaise                                                                                                                                 | Others         | YES | YES | YES | YES | 4.12   | A044X                 |
| 188 | Mole into paste or powder                                                                                                                  | Others         | YES | YES | YES | YES | 0.1    | A043F                 |
| 189 | Mustard                                                                                                                                    | Others         | YES | YES | YES | YES | 0.1    | A044G                 |
| 190 | Pepper                                                                                                                                     | Others         | YES | YES | YES | YES | 0.1    | HEAlabel <sup>2</sup> |
| 191 | Salt                                                                                                                                       | Others         | YES | YES | YES | YES | 0.1    | A042P                 |
| 192 | Sweet and spicy sauces                                                                                                                     | Others         | YES | YES | YES | YES | 0.1    | HEAlabel <sup>2</sup> |
| 193 | Vinegar                                                                                                                                    | Others         | YES | YES | YES | YES | 0.1    | A044L                 |
| 194 | Other dressings, spices and sauces, vanilla                                                                                                | Others         | YES | YES | YES | YES | 2      | HEAlabel <sup>2</sup> |
| 195 | Rice cereal, oatmeal, banana, apple, mixed for baby                                                                                        | Grains         | NO  | NO  | YES | YES | 1.044  | A00CV                 |
| 196 | Baby food                                                                                                                                  | Grains         | YES | YES | YES | YES | 1.32   | A00EQ                 |
| 197 | Fruit and vegetable juices of any combination for babies                                                                                   | Beverages      | YES | YES | YES | YES | 1.44   | A03DB                 |
| 198 | Prepared pizzas                                                                                                                            | Fast food      | YES | YES | YES | YES | 5.561  | A03ZN                 |
| 199 | Carnitas                                                                                                                                   | Beef           | YES | YES | YES | YES | 17.648 | A03VV                 |
| 200 | Roasted chicken                                                                                                                            | Chicken        | YES | YES | YES | YES | 8.582  | A01SP                 |
| 201 | Barbecue and birria                                                                                                                        | Others         | YES | YES | YES | YES | 17.648 | A03VV                 |
| 202 | Other prepared foods: atole, flautas, stews, hot dogs, soups, tacos, tamales, cakes, sopes, menudo, pozole, smoothies, jellies, corn, etc. | Fast food      | YES | YES | YES | YES | 8.073  | A03ZK                 |
| 203 | Fresh mushrooms: mushrooms, huitlacoche and mushrooms                                                                                      | Vegetables     | NO  | NO  | YES | YES | 4.927  | A0ETG                 |
| 204 | Insects: grasshoppers, chinicuiles, escamoles, maguey worms, ants (chicatana), jumiles                                                     | Others         | YES | YES | YES | YES | 0.1    | Low                   |
| 205 | Flans, jellies and powdered puddings                                                                                                       | Sweet or salty | YES | YES | YES | YES | 12.428 | A00BX                 |
| 206 | Caramels, milk caramels, jamoncillos and custard                                                                                           | Sweet or salty | YES | YES | YES | YES | 2.127  | A02PX                 |
| 207 | Ates, peanut butter, jellies, jam                                                                                                          | Sweet or salty | YES | YES | YES | YES | 2.435  | A01MM                 |
| 208 | Ice creams, ice creams and popsicles                                                                                                       | Sweet or salty | YES | YES | YES | YES | 10.568 | A02PZ                 |
| 209 | Other sweets, basket of sweets                                                                                                             | Sweet or salty | YES | YES | YES | YES | 0.767  | A0EQQ                 |
| 210 | Nixtamal grinding                                                                                                                          | Corn           | YES | YES | YES | YES | 0.992  | A002Q                 |
| 211 | Other expenses related to food preparation, lime for nixtamal                                                                              | Not included   | ..  | ..  | ..  | ..  | ..     | ..                    |
| 212 | Packaged food and/or drinks, food pantry provided by other households                                                                      | Not included   | ..  | ..  | ..  | ..  | ..     | ..                    |
| 213 | Pet food                                                                                                                                   | Not included   | ..  | ..  | ..  | ..  | ..     | ..                    |
| 214 | Animal feed for home use                                                                                                                   | Not included   | ..  | ..  | ..  | ..  | ..     | ..                    |
| 215 | Bottled natural water                                                                                                                      | Beverages      | YES | YES | NO  | YES | 0.272  | A03DT                 |
| 216 | Mineral water, quina, demineralized with or without flavor                                                                                 | Beverages      | YES | YES | YES | YES | 0.272  | A03DQ                 |
| 217 | Prepared water and natural juices                                                                                                          | Beverages      | NO  | NO  | YES | YES | 0.514  | A03GE                 |
| 218 | Packaged juices and nectars                                                                                                                | Beverages      | YES | YES | YES | YES | 0.272  | A03DY                 |
| 219 | Concentrates and powders to prepare beverages                                                                                              | Beverages      | NO  | YES | YES | YES | 0.514  | A03GE                 |
| 220 | Cola and flavored soft drinks                                                                                                              | Beverages      | YES | YES | YES | YES | 0.514  | A03DZ                 |
| 221 | Energy drink                                                                                                                               | Beverages      | NO  | NO  | YES | YES | 0.514  | A03GA                 |
| 222 | Ice, natural syrup, lechugilla, sangrita, tascalate                                                                                        | Others         | YES | YES | YES | YES | 0.1    | Low                   |
| 223 | cognac and brandy                                                                                                                          | Others         | YES | YES | YES | YES | 1.153  | A03PE                 |
| 224 | Beer                                                                                                                                       | Others         | YES | YES | YES | YES | 0.43   | A03MB                 |
| 225 | Anise (liquor)                                                                                                                             | Others         | NO  | NO  | YES | YES | 1.055  | A03NS                 |
| 226 | Sherry                                                                                                                                     | Others         | NO  | NO  | YES | YES | 1.055  | A03NS                 |
| 227 | Fruit liqueur or creams                                                                                                                    | Others         | NO  | NO  | YES | YES | 1.055  | A03NS                 |

|     |                                                                  |        |     |     |     |     |       |       |
|-----|------------------------------------------------------------------|--------|-----|-----|-----|-----|-------|-------|
| 228 | Mead, pulque, tlachique, tepache, tuba and fermented corn drinks | Others | YES | YES | YES | YES | 1.055 | A03NS |
| 229 | Aguardiente, cane alcohol, charanda, mezcal                      | Others | YES | YES | YES | YES | 1.055 | A03NS |
| 230 | Aged rum, white, with lemon                                      | Others | YES | YES | YES | YES | 1.292 | A03PJ |
| 231 | Eggnog                                                           | Others | NO  | NO  | YES | YES | 1.397 | A03PS |
| 232 | white and rosé cider                                             | Others | NO  | NO  | YES | YES | 0.959 | A03ND |
| 233 | Añejo, blue and white tequila                                    | Others | YES | YES | YES | YES | 1.055 | A03NS |
| 234 | White, rosé, red table wine                                      | Others | YES | YES | YES | YES | 1.397 | A03MT |
| 235 | Vodka                                                            | Others | YES | YES | YES | YES | 1.224 | A03PH |
| 236 | Whiskey                                                          | Others | YES | YES | YES | YES | 1.272 | A03PF |
| 237 | Prepared alcoholic drink                                         | Others | YES | YES | YES | YES | 1.292 | A03PN |
| 238 | Other alcoholic beverages: champagne                             | Others | NO  | NO  | YES | YES | 1.291 | A03NA |

**Supplementary table 2. Descriptive characteristics in Mexican households, 1989, 2020 ENIGHS.**

|                          | 1989  | 1992  | 1994  | 1996  | 1998  | 2000  | 2002  | 2004  | 2006  | 2008  | 2010  | 2012  | 2014  | 2016  | 2018  | 2020  |
|--------------------------|-------|-------|-------|-------|-------|-------|-------|-------|-------|-------|-------|-------|-------|-------|-------|-------|
| n, households            | 11051 | 10075 | 12389 | 13708 | 10577 | 9792  | 16769 | 22029 | 20331 | 29034 | 27233 | 8899  | 19347 | 69750 | 74156 | 88398 |
| Education                |       |       |       |       |       |       |       |       |       |       |       |       |       |       |       |       |
| No formal education      | 20.13 | 17.69 | 19.14 | 16.01 | 12.51 | 12.56 | 13.53 | 11.24 | 9.99  | 9.36  | 8.96  | 8.99  | 7.81  | 7.16  | 6.69  | 6.37  |
| Completed Pre elementary | 28.17 | 27.96 | 25.57 | 25.72 | 25.25 | 23.22 | 22.62 | 23.34 | 19.01 | 21.99 | 19.49 | 18.52 | 17.31 | 15.77 | 14.70 | 14.30 |
| Completed Elementary     | 24.13 | 24.49 | 24.28 | 24.22 | 24.44 | 24.58 | 23.41 | 23.05 | 38.03 | 22.73 | 23.11 | 21.53 | 20.75 | 20.46 | 19.81 | 19.38 |
| Completed Medium school  | 12.45 | 14.74 | 14.78 | 16.81 | 17.91 | 19.99 | 20.76 | 22.94 | 14.85 | 24.36 | 25.56 | 26.65 | 27.59 | 29.00 | 29.29 | 29.63 |
| Completed High school    | 8.65  | 8.50  | 9.34  | 10.34 | 9.88  | 10.05 | 11.18 | 9.16  | 7.26  | 10.73 | 11.12 | 13.07 | 13.86 | 14.55 | 15.67 | 16.30 |
| Completed College        | 6.46  | 6.63  | 6.89  | 6.92  | 7.35  | 9.61  | 8.50  | 10.28 | 10.95 | 10.84 | 11.76 | 11.24 | 12.69 | 13.06 | 13.83 | 14.01 |
| Urbanicity               |       |       |       |       |       |       |       |       |       |       |       |       |       |       |       |       |
| Rural                    | ..    | 23.08 | 23.46 | 22.33 | 22.52 | 22.51 | 23.35 | 22.44 | 22.28 | 21.36 | 21.36 | 22.02 | 22.04 | 21.63 | 23.03 | 21.59 |
| Small                    | ..    | 13.31 | 13.47 | 13.51 | 13.38 | 13.34 | 13.43 | 13.64 | 13.19 | 13.84 | 13.80 | 13.30 | 13.46 | 13.82 | 13.97 | 13.67 |
| Medium                   | ..    | 13.58 | 13.97 | 13.36 | 13.31 | 13.47 | 13.47 | 13.94 | 14.73 | 14.53 | 14.44 | 14.39 | 14.75 | 14.44 | 14.65 | 14.87 |
| Metropolitan             | ..    | 50.03 | 49.09 | 50.80 | 50.80 | 50.69 | 49.76 | 49.98 | 49.80 | 50.27 | 50.39 | 50.29 | 49.75 | 50.12 | 48.35 | 49.87 |



**Supplementary table 3. Purchases by food group per equivalent adult in kilograms, 1989, 2020 ENIGHS**

| Food group     | 1989 |            | 1992 |            | 1994 |            | 1996 |            | 1998 |            | 2000 |            | 2002 |            | 2004 |            | 2006 |            |
|----------------|------|------------|------|------------|------|------------|------|------------|------|------------|------|------------|------|------------|------|------------|------|------------|
|                | Mean | 95% CI     | Mean | 95% CI     | Mean | 95% CI     | Mean | 95% CI     | Mean | 95% CI     | Mean | 95% CI     | Mean | 95% CI     | Mean | 95% CI     | Mean | 95% CI     |
| Beef           | 0.04 | 0.03, 0.04 | 0.04 | 0.03, 0.04 | 0.04 | 0.04, 0.04 | 0.04 | 0.03, 0.04 | 0.04 | 0.04, 0.04 | 0.05 | 0.04, 0.05 | 0.05 | 0.04, 0.05 | 0.05 | 0.04, 0.04 | 0.05 | 0.04, 0.04 |
| Dairy          | 0.20 | 0.19, 0.21 | 0.21 | 0.19, 0.21 | 0.20 | 0.19, 0.21 | 0.19 | 0.18, 0.19 | 0.20 | 0.19, 0.2  | 0.20 | 0.19, 0.21 | 0.21 | 0.2, 0.22  | 0.18 | 0.17, 0.18 | 0.16 | 0.15, 0.17 |
| Corn           | 0.29 | 0.28, 0.3  | 0.27 | 0.25, 0.28 | 0.26 | 0.24, 0.26 | 0.28 | 0.27, 0.29 | 0.26 | 0.24, 0.26 | 0.27 | 0.25, 0.27 | 0.26 | 0.24, 0.27 | 0.24 | 0.22, 0.24 | 0.22 | 0.2, 0.22  |
| Legume         | 0.04 | 0.03, 0.04 | 0.04 | 0.03, 0.04 | 0.04 | 0.03, 0.03 | 0.04 | 0.03, 0.04 | 0.04 | 0.03, 0.03 | 0.04 | 0.03, 0.03 | 0.03 | 0.03, 0.03 | 0.03 | 0.02, 0.03 | 0.03 | 0.02, 0.03 |
| Beverages      | 0.19 | 0.17, 0.19 | 0.21 | 0.19, 0.22 | 0.23 | 0.21, 0.24 | 0.20 | 0.18, 0.2  | 0.26 | 0.25, 0.27 | 0.29 | 0.27, 0.31 | 0.43 | 0.4, 0.45  | 0.50 | 0.47, 0.52 | 0.63 | 0.59, 0.66 |
| Sweet or salty | 0.04 | 0.03, 0.03 | 0.03 | 0.02, 0.02 | 0.03 | 0.02, 0.02 | 0.02 | 0.02, 0.02 | 0.03 | 0.02, 0.02 | 0.03 | 0.02, 0.03 | 0.03 | 0.02, 0.03 | 0.03 | 0.02, 0.03 | 0.04 | 0.02, 0.04 |
| Chicken        | 0.03 | 0.02, 0.03 | 0.04 | 0.03, 0.04 | 0.04 | 0.03, 0.04 | 0.04 | 0.03, 0.03 | 0.04 | 0.03, 0.03 | 0.04 | 0.04, 0.04 | 0.04 | 0.04, 0.04 | 0.05 | 0.04, 0.04 | 0.05 | 0.04, 0.05 |
| Oil            | 0.03 | 0.02, 0.02 | 0.03 | 0.02, 0.02 | 0.03 | 0.02, 0.03 | 0.03 | 0.02, 0.03 | 0.03 | 0.02, 0.03 | 0.04 | 0.03, 0.03 | 0.03 | 0.02, 0.02 | 0.02 | 0.02, 0.02 | 0.02 | 0.02, 0.02 |
| Vegetables     | 0.13 | 0.12, 0.13 | 0.13 | 0.12, 0.13 | 0.13 | 0.12, 0.13 | 0.14 | 0.13, 0.14 | 0.13 | 0.12, 0.13 | 0.14 | 0.13, 0.14 | 0.15 | 0.13, 0.15 | 0.13 | 0.12, 0.13 | 0.13 | 0.12, 0.14 |
| Pork           | 0.01 | 0.01, 0.01 | 0.01 | 0.01, 0.01 | 0.01 | 0.01, 0.01 | 0.01 | 0.01, 0.01 | 0.01 | 0.01, 0.01 | 0.01 | 0.01, 0.01 | 0.01 | 0.01, 0.01 | 0.01 | 0, 0.01    | 0.01 | 0, 0.01    |
| Grain          | 0.08 | 0.08, 0.08 | 0.08 | 0.07, 0.08 | 0.08 | 0.07, 0.08 | 0.08 | 0.07, 0.08 | 0.08 | 0.07, 0.07 | 0.08 | 0.08, 0.08 | 0.08 | 0.07, 0.08 | 0.08 | 0.07, 0.07 | 0.08 | 0.07, 0.07 |
| Seafood        | 0.01 | 0, 0.01    | 0.01 | 0, 0.01    | 0.01 | 0, 0.01    | 0.01 | 0, 0.01    | 0.01 | 0, 0.01    | 0.01 | 0, 0.01    | 0.01 | 0, 0.01    | 0.01 | 0, 0.01    | 0.01 | 0, 0.01    |
| Egg            | 0.04 | 0.03, 0.03 | 0.04 | 0.03, 0.03 | 0.04 | 0.03, 0.03 | 0.04 | 0.03, 0.03 | 0.04 | 0.03, 0.03 | 0.04 | 0.03, 0.04 | 0.04 | 0.03, 0.03 | 0.04 | 0.03, 0.03 | 0.04 | 0.03, 0.03 |
| Others         | 0.06 | 0.05, 0.06 | 0.05 | 0.04, 0.05 | 0.06 | 0.05, 0.05 | 0.05 | 0.04, 0.05 | 0.05 | 0.04, 0.05 | 0.05 | 0.04, 0.05 | 0.05 | 0.04, 0.05 | 0.05 | 0.04, 0.05 | 0.05 | 0.04, 0.06 |
| Fruit          | 0.08 | 0.07, 0.08 | 0.10 | 0.09, 0.1  | 0.10 | 0.09, 0.11 | 0.09 | 0.08, 0.09 | 0.08 | 0.07, 0.08 | 0.12 | 0.1, 0.12  | 0.10 | 0.08, 0.1  | 0.09 | 0.08, 0.09 | 0.10 | 0.09, 0.1  |
| Fastfood       | 0.00 | 0, 0       | 0.01 | 0, 0.01    | 0.01 | 0, 0.01    | 0.02 | 0.01, 0.02 | 0.02 | 0.01, 0.01 | 0.02 | 0.02, 0.02 | 0.03 | 0.02, 0.03 | 0.03 | 0.02, 0.03 | 0.05 | 0.04, 0.04 |
| Seed           | 0.00 | 0, 0       | 0.00 | 0, 0       | 0.00 | 0, 0       | 0.00 | 0, 0       | 0.00 | 0, 0       | 0.00 | 0, 0       | 0.00 | 0, 0       | 0.00 | 0, 0       | 0.00 | 0, 0       |
| Total          | 1.27 | 1.24, 1.30 | 1.28 | 1.25, 1.31 | 1.31 | 1.28, 1.34 | 1.28 | 1.25, 1.30 | 1.30 | 1.28, 1.33 | 1.44 | 1.40, 1.47 | 1.55 | 1.51, 1.59 | 1.53 | 1.49, 1.57 | 1.66 | 1.61, 1.70 |

**Supplementary table 3. Purchases by food group per equivalent adult in kilograms, 1989, 2020 ENIGHS**

| Food group     | 2008 |            | 2010 |            | 2012 |            | 2014 |            | 2016 |            | 2018 |            | 2020 |            | Difference 2020-1989 |               |
|----------------|------|------------|------|------------|------|------------|------|------------|------|------------|------|------------|------|------------|----------------------|---------------|
|                | Mean | 95% CI     | Mean | 95% CI     | Mean | 95% CI     | Mean | 95% CI     | Mean | 95% CI     | Mean | 95% CI     | Mean | 95% CI     |                      | 95% CI        |
| Beef           | 0.05 | 0.04, 0.04 | 0.05 | 0.04, 0.05 | 0.05 | 0.04, 0.05 | 0.05 | 0.04, 0.04 | 0.04 | 0.04, 0.04 | 0.05 | 0.04, 0.04 | 0.05 | 0.04, 0.04 | 0.01                 | 0.009, 0.01   |
| Dairy          | 0.15 | 0.15, 0.15 | 0.15 | 0.15, 0.15 | 0.16 | 0.15, 0.17 | 0.16 | 0.15, 0.16 | 0.15 | 0.14, 0.15 | 0.14 | 0.13, 0.14 | 0.13 | 0.12, 0.13 | -0.07                | -0.07, -0.06  |
| Corn           | 0.23 | 0.22, 0.23 | 0.23 | 0.22, 0.24 | 0.25 | 0.24, 0.26 | 0.26 | 0.24, 0.26 | 0.24 | 0.23, 0.24 | 0.25 | 0.24, 0.25 | 0.25 | 0.25, 0.25 | -0.04                | -0.04, -0.03  |
| Legume         | 0.03 | 0.03, 0.03 | 0.03 | 0.02, 0.03 | 0.03 | 0.03, 0.03 | 0.03 | 0.03, 0.03 | 0.03 | 0.03, 0.03 | 0.03 | 0.03, 0.03 | 0.03 | 0.03, 0.03 | -0.01                | -0.01, -0.009 |
| Beverages      | 0.64 | 0.61, 0.66 | 0.62 | 0.59, 0.64 | 0.67 | 0.63, 0.71 | 0.73 | 0.7, 0.75  | 0.73 | 0.7, 0.74  | 0.72 | 0.7, 0.73  | 0.86 | 0.84, 0.87 | 0.67                 | 0.65, 0.68    |
| Sweet or salty | 0.03 | 0.02, 0.03 | 0.03 | 0.02, 0.03 | 0.04 | 0.03, 0.04 | 0.04 | 0.03, 0.04 | 0.04 | 0.03, 0.04 | 0.04 | 0.03, 0.04 | 0.04 | 0.03, 0.03 | 0.0                  | 0.0, 0.0      |
| Chicken        | 0.05 | 0.04, 0.05 | 0.05 | 0.04, 0.04 | 0.05 | 0.04, 0.04 | 0.05 | 0.04, 0.05 | 0.06 | 0.05, 0.05 | 0.06 | 0.05, 0.05 | 0.06 | 0.05, 0.05 | 0.03                 | 0.02, 0.03    |
| Oil            | 0.02 | 0.02, 0.02 | 0.02 | 0.02, 0.02 | 0.02 | 0.02, 0.02 | 0.03 | 0.02, 0.02 | 0.02 | 0.02, 0.02 | 0.02 | 0.02, 0.02 | 0.02 | 0.02, 0.02 | -0.01                | -0.01, -0.009 |
| Vegetables     | 0.14 | 0.14, 0.14 | 0.15 | 0.14, 0.15 | 0.16 | 0.15, 0.16 | 0.17 | 0.16, 0.17 | 0.16 | 0.16, 0.16 | 0.16 | 0.15, 0.16 | 0.17 | 0.16, 0.17 | 0.04                 | 0.03, 0.04    |
| Pork           | 0.01 | 0, 0.01    | 0.01 | 0, 0.01    | 0.01 | 0.01, 0.01 | 0.01 | 0.01, 0.01 | 0.01 | 0.01, 0.01 | 0.01 | 0.01, 0.01 | 0.02 | 0.01, 0.01 | 0.01                 | 0.009, 0.01   |
| Grain          | 0.08 | 0.07, 0.08 | 0.08 | 0.07, 0.08 | 0.09 | 0.08, 0.09 | 0.09 | 0.08, 0.08 | 0.09 | 0.08, 0.08 | 0.08 | 0.08, 0.08 | 0.08 | 0.07, 0.08 | 0.0                  | 0.0, 0.0      |
| Seafood        | 0.01 | 0, 0.01    | 0.01 | 0, 0.01    | 0.01 | 0.01, 0.01 | 0.01 | 0.01, 0.01 | 0.01 | 0.01, 0.01 | 0.01 | 0.01, 0.01 | 0.01 | 0.01, 0.01 | 0.0                  | 0.0, 0.0      |
| Egg            | 0.04 | 0.03, 0.04 | 0.04 | 0.04, 0.04 | 0.04 | 0.03, 0.03 | 0.04 | 0.04, 0.04 | 0.04 | 0.04, 0.04 | 0.05 | 0.04, 0.04 | 0.05 | 0.04, 0.05 | 0.01                 | 0.009, 0.01   |
| Others         | 0.04 | 0.03, 0.04 | 0.04 | 0.03, 0.04 | 0.05 | 0.04, 0.05 | 0.04 | 0.04, 0.04 | 0.05 | 0.04, 0.04 | 0.05 | 0.04, 0.04 | 0.05 | 0.04, 0.04 | -0.01                | -0.01, -0.008 |
| Fruit          | 0.10 | 0.09, 0.1  | 0.09 | 0.08, 0.09 | 0.11 | 0.1, 0.11  | 0.11 | 0.1, 0.11  | 0.11 | 0.1, 0.11  | 0.10 | 0.1, 0.1   | 0.11 | 0.11, 0.11 | 0.03                 | 0.02, 0.03    |
| Fastfood       | 0.03 | 0.02, 0.03 | 0.04 | 0.03, 0.04 | 0.07 | 0.06, 0.07 | 0.08 | 0.07, 0.09 | 0.08 | 0.07, 0.08 | 0.10 | 0.09, 0.09 | 0.12 | 0.11, 0.12 | 0.11                 | 0.11, 0.11    |
| Seed           | 0.00 | 0, 0       | 0.00 | 0, 0       | 0.00 | 0, 0       | 0.00 | 0, 0       | 0.00 | 0, 0       | 0.00 | 0, 0       | 0.00 | 0, 0       | 0.0                  | 0.0, 0.0      |
| Total          | 1.66 | 1.64, 1.69 | 1.66 | 1.63, 1.69 | 1.82 | 1.77, 1.86 | 1.89 | 1.85, 1.93 | 1.87 | 1.85, 1.90 | 1.88 | 1.86, 1.90 | 2.05 | 2.03, 2.07 | 0.78                 | 0.76, 0.80    |

**Supplementary table 4. GHGE by food group per equivalent adult in kilograms of CO<sub>2</sub>, 1989, 2020 ENIGHS**

|                | 1989 |            | 1992 |            | 1994 |            | 1996 |            | 1998 |            | 2000 |            | 2002 |            | 2004 |            | 2006 |            |
|----------------|------|------------|------|------------|------|------------|------|------------|------|------------|------|------------|------|------------|------|------------|------|------------|
| Food group     | Mean | 95% CI     | Mean | 95% CI     | Mean | 95% CI     | Mean | 95% CI     | Mean | 95% CI     | Mean | 95% CI     | Mean | 95% CI     | Mean | 95% CI     | Mean | 95% CI     |
| Beef           | 0.76 | 0.72, 0.8  | 0.79 | 0.74, 0.84 | 0.85 | 0.8, 0.89  | 0.76 | 0.72, 0.79 | 0.81 | 0.78, 0.84 | 0.93 | 0.88, 0.98 | 0.94 | 0.89, 0.97 | 0.89 | 0.85, 0.91 | 0.85 | 0.81, 0.88 |
| Dairy          | 0.63 | 0.58, 0.67 | 0.69 | 0.64, 0.73 | 0.79 | 0.69, 0.87 | 0.61 | 0.56, 0.64 | 0.65 | 0.6, 0.69  | 0.66 | 0.61, 0.7  | 0.88 | 0.71, 1.04 | 0.61 | 0.56, 0.65 | 0.57 | 0.53, 0.6  |
| Corn           | 0.21 | 0.2, 0.22  | 0.18 | 0.16, 0.19 | 0.17 | 0.15, 0.17 | 0.18 | 0.16, 0.19 | 0.16 | 0.15, 0.17 | 0.17 | 0.15, 0.17 | 0.16 | 0.15, 0.17 | 0.14 | 0.13, 0.15 | 0.12 | 0.11, 0.12 |
| Legume         | 0.15 | 0.14, 0.16 | 0.14 | 0.13, 0.15 | 0.14 | 0.13, 0.14 | 0.15 | 0.14, 0.15 | 0.13 | 0.12, 0.13 | 0.13 | 0.12, 0.13 | 0.12 | 0.11, 0.12 | 0.12 | 0.11, 0.12 | 0.10 | 0.09, 0.11 |
| Beverages      | 0.22 | 0.2, 0.23  | 0.21 | 0.19, 0.22 | 0.32 | 0.15, 0.47 | 0.20 | 0.18, 0.21 | 0.23 | 0.21, 0.24 | 0.24 | 0.22, 0.25 | 0.27 | 0.25, 0.28 | 0.29 | 0.27, 0.3  | 0.30 | 0.28, 0.31 |
| Sweet or salty | 0.42 | 0.35, 0.47 | 0.39 | 0.25, 0.52 | 0.45 | 0.33, 0.56 | 0.30 | 0.24, 0.35 | 0.37 | 0.3, 0.42  | 0.45 | 0.31, 0.58 | 0.60 | 0.48, 0.72 | 0.54 | 0.47, 0.61 | 0.49 | 0.42, 0.55 |
| Chicken        | 0.18 | 0.17, 0.19 | 0.25 | 0.23, 0.26 | 0.26 | 0.25, 0.27 | 0.23 | 0.21, 0.23 | 0.23 | 0.22, 0.24 | 0.28 | 0.26, 0.29 | 0.31 | 0.29, 0.32 | 0.32 | 0.3, 0.33  | 0.33 | 0.32, 0.34 |
| Oil            | 0.14 | 0.13, 0.14 | 0.13 | 0.12, 0.13 | 0.15 | 0.14, 0.15 | 0.14 | 0.13, 0.14 | 0.13 | 0.12, 0.14 | 0.15 | 0.14, 0.16 | 0.13 | 0.11, 0.13 | 0.12 | 0.11, 0.12 | 0.11 | 0.1, 0.11  |
| Vegetables     | 0.12 | 0.11, 0.12 | 0.12 | 0.11, 0.12 | 0.12 | 0.11, 0.12 | 0.13 | 0.12, 0.13 | 0.12 | 0.11, 0.12 | 0.13 | 0.12, 0.13 | 0.13 | 0.12, 0.13 | 0.12 | 0.11, 0.12 | 0.13 | 0.12, 0.13 |
| Pork           | 0.12 | 0.11, 0.12 | 0.12 | 0.11, 0.13 | 0.12 | 0.11, 0.12 | 0.11 | 0.1, 0.11  | 0.12 | 0.11, 0.13 | 0.13 | 0.11, 0.13 | 0.10 | 0.09, 0.11 | 0.09 | 0.08, 0.09 | 0.10 | 0.09, 0.11 |
| Grain          | 0.07 | 0.06, 0.07 | 0.07 | 0.06, 0.07 | 0.07 | 0.06, 0.06 | 0.06 | 0.06, 0.06 | 0.06 | 0.06, 0.06 | 0.07 | 0.06, 0.07 | 0.07 | 0.06, 0.07 | 0.08 | 0.07, 0.08 | 0.08 | 0.07, 0.08 |
| Seafood        | 0.11 | 0.08, 0.13 | 0.08 | 0.06, 0.08 | 0.09 | 0.07, 0.1  | 0.08 | 0.06, 0.08 | 0.07 | 0.06, 0.07 | 0.10 | 0.08, 0.12 | 0.12 | 0.1, 0.12  | 0.07 | 0.06, 0.08 | 0.11 | 0.09, 0.12 |
| Egg            | 0.06 | 0.05, 0.06 | 0.06 | 0.06, 0.06 | 0.06 | 0.06, 0.06 | 0.06 | 0.06, 0.06 | 0.06 | 0.05, 0.06 | 0.07 | 0.06, 0.07 | 0.06 | 0.06, 0.06 | 0.07 | 0.06, 0.06 | 0.06 | 0.06, 0.06 |
| Others         | 0.05 | 0.04, 0.05 | 0.06 | 0.05, 0.06 | 0.07 | 0.06, 0.07 | 0.06 | 0.05, 0.06 | 0.06 | 0.05, 0.07 | 0.07 | 0.06, 0.07 | 0.06 | 0.05, 0.06 | 0.06 | 0.05, 0.06 | 0.06 | 0.05, 0.06 |
| Fruit          | 0.41 | 0.39, 0.43 | 0.48 | 0.44, 0.51 | 0.53 | 0.48, 0.56 | 0.44 | 0.41, 0.46 | 0.40 | 0.37, 0.42 | 0.58 | 0.54, 0.62 | 0.50 | 0.46, 0.52 | 0.49 | 0.46, 0.52 | 0.07 | 0.07, 0.07 |
| Fastfood       | 0.03 | 0.02, 0.04 | 0.08 | 0.06, 0.09 | 0.10 | 0.07, 0.12 | 0.16 | 0.13, 0.18 | 0.12 | 0.1, 0.13  | 0.19 | 0.16, 0.21 | 0.22 | 0.18, 0.25 | 0.24 | 0.22, 0.26 | 0.37 | 0.34, 0.39 |
| Seed           | 0.00 | 0, 0       | 0.00 | 0, 0       | 0.00 | 0, 0       | 0.00 | 0, 0       | 0.00 | 0, 0       | 0.00 | 0, 0       | 0.00 | 0, 0       | 0.00 | 0, 0       | 0.00 | 0, 0       |
| Total          | 3.70 | 3.57, 3.82 | 3.84 | 3.63, 4.04 | 4.27 | 3.96, 4.56 | 3.66 | 3.53, 3.79 | 3.75 | 3.63, 3.86 | 4.36 | 4.17, 4.54 | 4.67 | 4.43, 4.90 | 4.25 | 4.13, 4.36 | 3.87 | 3.76, 3.97 |

**Supplementary table 4. GHGE by food group per equivalent adult in kilograms of CO<sub>2</sub>, 1989, 2020 ENIGHS**

| Food group     | 2008 |            | 2010 |            | 2012 |            | 2014 |            | 2016 |            | 2018 |            | 2020 |            | Difference 2020-1989 |              |
|----------------|------|------------|------|------------|------|------------|------|------------|------|------------|------|------------|------|------------|----------------------|--------------|
|                | Mean | 95% CI     | Mean | 95% CI     | Mean | 95% CI     | Mean | 95% CI     | Mean | 95% CI     | Mean | 95% CI     | Mean | 95% CI     |                      | 95% CI       |
| Beef           | 0.86 | 0.83, 0.88 | 0.89 | 0.86, 0.91 | 0.87 | 0.83, 0.91 | 0.79 | 0.76, 0.81 | 0.73 | 0.71, 0.74 | 0.76 | 0.74, 0.77 | 0.83 | 0.81, 0.84 | 0.07                 | 0.05, 0.08   |
| Dairy          | 0.55 | 0.52, 0.58 | 0.57 | 0.53, 0.6  | 0.71 | 0.63, 0.77 | 0.72 | 0.65, 0.78 | 0.67 | 0.63, 0.7  | 0.61 | 0.58, 0.63 | 0.57 | 0.54, 0.59 | -0.06                | -0.08, -0.03 |
| Corn           | 0.14 | 0.13, 0.15 | 0.14 | 0.13, 0.15 | 0.17 | 0.15, 0.18 | 0.17 | 0.16, 0.17 | 0.16 | 0.15, 0.16 | 0.17 | 0.16, 0.16 | 0.17 | 0.16, 0.16 | -0.04                | -0.04, -0.03 |
| Legume         | 0.11 | 0.1, 0.11  | 0.11 | 0.1, 0.11  | 0.11 | 0.1, 0.12  | 0.12 | 0.11, 0.12 | 0.11 | 0.1, 0.11  | 0.11 | 0.1, 0.11  | 0.11 | 0.1, 0.1   | -0.04                | -0.04, -0.03 |
| Beverages      | 0.30 | 0.28, 0.3  | 0.32 | 0.3, 0.33  | 0.38 | 0.35, 0.4  | 0.36 | 0.34, 0.37 | 0.39 | 0.37, 0.41 | 0.38 | 0.36, 0.38 | 0.42 | 0.4, 0.42  | 0.20                 | 0.19, 0.20   |
| Sweet or salty | 0.39 | 0.34, 0.43 | 0.54 | 0.46, 0.61 | 0.82 | 0.57, 1.07 | 0.93 | 0.68, 1.18 | 0.69 | 0.61, 0.75 | 0.77 | 0.62, 0.91 | 0.56 | 0.5, 0.6   | 0.14                 | 0.09, 0.18   |
| Chicken        | 0.34 | 0.33, 0.35 | 0.33 | 0.31, 0.33 | 0.32 | 0.3, 0.33  | 0.34 | 0.32, 0.34 | 0.37 | 0.36, 0.37 | 0.38 | 0.37, 0.39 | 0.40 | 0.38, 0.4  | 0.22                 | 0.21, 0.22   |
| Oil            | 0.11 | 0.1, 0.11  | 0.11 | 0.1, 0.11  | 0.11 | 0.1, 0.11  | 0.12 | 0.11, 0.12 | 0.12 | 0.11, 0.11 | 0.12 | 0.11, 0.12 | 0.12 | 0.11, 0.12 | -0.02                | -0.02, -0.01 |
| Vegetables     | 0.13 | 0.12, 0.13 | 0.14 | 0.13, 0.14 | 0.15 | 0.13, 0.15 | 0.16 | 0.15, 0.16 | 0.15 | 0.14, 0.15 | 0.15 | 0.15, 0.15 | 0.16 | 0.15, 0.16 | 0.05                 | 0.04, 0.05   |
| Pork           | 0.10 | 0.09, 0.1  | 0.10 | 0.09, 0.1  | 0.11 | 0.1, 0.12  | 0.11 | 0.1, 0.11  | 0.13 | 0.12, 0.13 | 0.14 | 0.13, 0.14 | 0.17 | 0.15, 0.17 | 0.05                 | 0.03, 0.06   |
| Grain          | 0.08 | 0.08, 0.08 | 0.09 | 0.08, 0.08 | 0.09 | 0.08, 0.09 | 0.09 | 0.09, 0.09 | 0.09 | 0.08, 0.09 | 0.09 | 0.08, 0.09 | 0.09 | 0.08, 0.08 | 0.03                 | 0.02, 0.03   |
| Seafood        | 0.11 | 0.09, 0.11 | 0.11 | 0.1, 0.11  | 0.12 | 0.1, 0.13  | 0.11 | 0.1, 0.12  | 0.12 | 0.11, 0.12 | 0.12 | 0.11, 0.12 | 0.13 | 0.12, 0.13 | 0.02                 | 0.01, 0.02   |
| Egg            | 0.07 | 0.06, 0.07 | 0.07 | 0.07, 0.07 | 0.07 | 0.06, 0.06 | 0.07 | 0.06, 0.07 | 0.08 | 0.07, 0.07 | 0.08 | 0.08, 0.08 | 0.09 | 0.08, 0.08 | 0.03                 | 0.02, 0.03   |
| Others         | 0.06 | 0.05, 0.06 | 0.06 | 0.05, 0.06 | 0.08 | 0.07, 0.08 | 0.06 | 0.06, 0.06 | 0.08 | 0.05, 0.1  | 0.07 | 0.06, 0.07 | 0.08 | 0.07, 0.08 | 0.03                 | 0.02, 0.03   |
| Fruit          | 0.07 | 0.06, 0.07 | 0.07 | 0.06, 0.07 | 0.08 | 0.07, 0.08 | 0.08 | 0.07, 0.08 | 0.08 | 0.07, 0.08 | 0.08 | 0.07, 0.07 | 0.08 | 0.08, 0.08 | -0.33                | -0.33, -0.32 |
| Fastfood       | 0.25 | 0.23, 0.26 | 0.30 | 0.28, 0.32 | 0.57 | 0.52, 0.61 | 0.67 | 0.61, 0.73 | 0.66 | 0.63, 0.68 | 0.77 | 0.73, 0.79 | 0.94 | 0.91, 0.96 | 0.91                 | 0.88, 0.93   |
| Seed           | 0.00 | 0, 0       | 0.00 | 0, 0       | 0.00 | 0, 0       | 0.00 | 0, 0       | 0.00 | 0, 0       | 0.00 | 0, 0       | 0.00 | 0, 0       | 0.0                  | 0.0, 0.0     |
| Total          | 3.68 | 3.60, 3.74 | 3.96 | 3.85, 4.06 | 4.76 | 4.47, 5.04 | 4.90 | 4.62, 5.18 | 4.63 | 4.53, 4.72 | 4.79 | 4.63, 4.95 | 4.89 | 4.81, 4.96 | 1.19                 | 1.12, 1.26   |

**Supplementary table 5. Purchases by educational level of the head of household in kilograms per equivalent adult, 1989, 2020 ENIGHS**

|                               | 1989 |            | 1992 |            | 1994 |            | 1996 |            | 1998 |            | 2000 |            | 2002 |            | 2004 |            | 2006 |            |
|-------------------------------|------|------------|------|------------|------|------------|------|------------|------|------------|------|------------|------|------------|------|------------|------|------------|
|                               | Mean | 95% CI     | Mean | 95% CI     | Mean | 95% CI     | Mean | 95% CI     | Mean | 95% CI     | Mean | 95% CI     | Mean | 95% CI     | Mean | 95% CI     | Mean | 95% CI     |
| No formal education           | 1.13 | 1.06, 1.18 | 1.11 | 1.03, 1.17 | 1.09 | 1.02, 1.15 | 1.11 | 1.06, 1.15 | 1.13 | 1.07, 1.18 | 1.28 | 1.19, 1.37 | 1.34 | 1.25, 1.42 | 1.48 | 1.32, 1.63 | 1.61 | 1.47, 1.75 |
| Completed Pre, Elementary     | 1.18 | 1.12, 1.22 | 1.16 | 1.11, 1.2  | 1.17 | 1.12, 1.21 | 1.14 | 1.1, 1.18  | 1.22 | 1.18, 1.26 | 1.34 | 1.28, 1.39 | 1.47 | 1.4, 1.54  | 1.46 | 1.39, 1.52 | 1.54 | 1.47, 1.6  |
| Completed Elementary          | 1.30 | 1.25, 1.33 | 1.30 | 1.25, 1.34 | 1.31 | 1.26, 1.35 | 1.27 | 1.22, 1.3  | 1.29 | 1.24, 1.32 | 1.44 | 1.39, 1.48 | 1.54 | 1.47, 1.6  | 1.50 | 1.44, 1.54 | 1.63 | 1.55, 1.69 |
| Completed Middle School       | 1.43 | 1.33, 1.52 | 1.40 | 1.33, 1.45 | 1.46 | 1.39, 1.51 | 1.39 | 1.33, 1.43 | 1.38 | 1.33, 1.43 | 1.45 | 1.39, 1.5  | 1.58 | 1.51, 1.64 | 1.52 | 1.46, 1.56 | 1.65 | 1.58, 1.72 |
| Completed High School         | 1.46 | 1.38, 1.53 | 1.49 | 1.4, 1.58  | 1.63 | 1.54, 1.71 | 1.49 | 1.43, 1.54 | 1.47 | 1.39, 1.53 | 1.56 | 1.46, 1.65 | 1.71 | 1.59, 1.81 | 1.64 | 1.57, 1.71 | 1.64 | 1.56, 1.72 |
| Completed College             | 1.48 | 1.39, 1.56 | 1.70 | 1.57, 1.82 | 1.66 | 1.57, 1.74 | 1.62 | 1.54, 1.7  | 1.67 | 1.57, 1.76 | 1.81 | 1.65, 1.96 | 1.91 | 1.78, 2.02 | 1.75 | 1.67, 1.83 | 2.02 | 1.85, 2.18 |
| College – no formal education | 0.36 | 0.35, 0.37 | 0.59 | 0.58, 0.60 | 0.56 | 0.54, 0.58 | 0.52 | 0.50, 0.54 | 0.54 | 0.51, 0.56 | 0.52 | 0.49, 0.55 | 0.57 | 0.55, 0.59 | 0.27 | 0.24, 0.29 | 0.40 | 0.35, 0.44 |

**Supplementary table 5. Purchases by educational level of the head of household in kilograms per equivalent adult, 1989, 2020 ENIGHS**

|                               | 2008 |            | 2010 |            | 2012 |            | 2014 |            | 2016 |            | 2018 |            | 2020 |            | Difference 2020-1989 |            |
|-------------------------------|------|------------|------|------------|------|------------|------|------------|------|------------|------|------------|------|------------|----------------------|------------|
|                               | Mean | 95% CI     | Mean | 95% CI     | Mean | 95% CI     | Mean | 95% CI     | Mean | 95% CI     | Mean | 95% CI     | Mean | 95% CI     |                      | 95% CI     |
| No formal education           | 1.55 | 1.48, 1.62 | 1.56 | 1.47, 1.65 | 1.78 | 1.65, 1.89 | 1.88 | 1.77, 1.98 | 1.99 | 1.9, 2.07  | 1.99 | 1.91, 2.06 | 2.11 | 2.03, 2.18 | 0.98                 | 0.96, 0.99 |
| Completed Pre, Elementary     | 1.59 | 1.53, 1.64 | 1.62 | 1.55, 1.68 | 1.78 | 1.67, 1.88 | 1.92 | 1.83, 1.99 | 1.98 | 1.92, 2.02 | 1.97 | 1.91, 2.01 | 2.15 | 2.09, 2.19 | 0.97                 | 0.95, 0.98 |
| Completed Elementary          | 1.60 | 1.55, 1.64 | 1.59 | 1.53, 1.64 | 1.79 | 1.7, 1.87  | 1.81 | 1.74, 1.88 | 1.81 | 1.77, 1.84 | 1.85 | 1.81, 1.88 | 2.04 | 1.99, 2.07 | 0.74                 | 0.72, 0.75 |
| Completed Middle School       | 1.62 | 1.57, 1.66 | 1.61 | 1.56, 1.65 | 1.74 | 1.66, 1.81 | 1.82 | 1.75, 1.87 | 1.77 | 1.73, 1.8  | 1.77 | 1.73, 1.8  | 1.92 | 1.88, 1.95 | 0.49                 | 0.47, 0.50 |
| Completed High School         | 1.78 | 1.71, 1.84 | 1.77 | 1.69, 1.84 | 1.82 | 1.7, 1.94  | 1.92 | 1.83, 1.99 | 1.85 | 1.8, 1.9   | 1.84 | 1.78, 1.89 | 1.98 | 1.93, 2.02 | 0.52                 | 0.50, 0.53 |
| Completed College             | 2.01 | 1.91, 2.1  | 1.95 | 1.86, 2.03 | 2.13 | 1.96, 2.29 | 2.14 | 2.03, 2.24 | 2.03 | 1.96, 2.1  | 2.05 | 1.98, 2.1  | 2.32 | 2.25, 2.38 | 0.84                 | 0.82, 0.85 |
| College – no formal education | 0.46 | 0.43, 0.48 | 0.38 | 0.35, 0.40 | 0.35 | 0.30, 0.40 | 0.26 | 0.22, 0.29 | 0.04 | 0.01, 0.06 | 0.06 | 0.04, 0.07 | 0.20 | 0.19, 0.21 |                      |            |

**Supplementary table 6. Purchases by urbanicity in kilograms per equivalent adult, 1992, 2020 ENIGHS**

|                      | 1992  |              | 1994  |              | 1996  |              | 1998  |              | 2000  |              | 2002  |              | 2004  |              | 2006  |              |
|----------------------|-------|--------------|-------|--------------|-------|--------------|-------|--------------|-------|--------------|-------|--------------|-------|--------------|-------|--------------|
|                      | Mean  | 95% CI       | Mean  | 95% CI       | Mean  | 95% CI       | Mean  | 95% CI       | Mean  | 95% CI       | Mean  | 95% CI       | Mean  | 95% CI       | Mean  | 95% CI       |
| Metropolitan         | 1.46  | 1.41, 1.49   | 1.48  | 1.43, 1.52   | 1.42  | 1.37, 1.45   | 1.43  | 1.4, 1.46    | 1.56  | 1.5, 1.6     | 1.64  | 1.59, 1.68   | 1.62  | 1.58, 1.64   | 1.74  | 1.68, 1.79   |
| Medium               | 1.29  | 1.19, 1.37   | 1.38  | 1.29, 1.47   | 1.30  | 1.23, 1.37   | 1.35  | 1.28, 1.42   | 1.47  | 1.41, 1.53   | 1.71  | 1.59, 1.82   | 1.64  | 1.55, 1.72   | 1.70  | 1.62, 1.77   |
| Small                | 1.26  | 1.16, 1.35   | 1.25  | 1.15, 1.33   | 1.19  | 1.11, 1.26   | 1.25  | 1.16, 1.34   | 1.40  | 1.27, 1.53   | 1.52  | 1.39, 1.64   | 1.46  | 1.28, 1.62   | 1.60  | 1.41, 1.77   |
| Rural                | 0.92  | 0.86, 0.97   | 0.95  | 0.9, 0.99    | 1.00  | 0.94, 1.05   | 1.02  | 0.96, 1.06   | 1.17  | 1.11, 1.22   | 1.27  | 1.16, 1.37   | 1.31  | 1.22, 1.4    | 1.47  | 1.38, 1.56   |
| Rural - Metropolitan | -0.54 | -0.55, -0.52 | -0.53 | -0.55, -0.50 | -0.42 | -0.44, -0.39 | -0.42 | -0.44, -0.39 | -0.38 | -0.41, -0.35 | -0.36 | -0.38, -0.33 | -0.30 | -0.32, -0.27 | -0.27 | -0.30, -0.23 |

**Supplementary table 6. Purchases by urbanicity in kilograms per equivalent adult, 1992, 2020 ENIGHS**

|                      | 2008  |              | 2010  |              | 2012  |              | 2014  |              | 2016  |              | 2018  |              | 2020  | Difference 2020-1992 |      |            |
|----------------------|-------|--------------|-------|--------------|-------|--------------|-------|--------------|-------|--------------|-------|--------------|-------|----------------------|------|------------|
|                      | Mean  | 95% CI       | Mean  | 95% CI       | Mean  | 95% CI       | Mean  | 95% CI       | Mean  | 95% CI       | Mean  | 95% CI       | Mean  | 95% CI               |      | 95% CI     |
| Metropolitan         | 1.79  | 1.75, 1.82   | 1.76  | 1.72, 1.79   | 1.91  | 1.83, 1.97   | 1.99  | 1.93, 2.04   | 1.93  | 1.89, 1.96   | 1.92  | 1.88, 1.95   | 2.10  | 2.06, 2.13           | 0.64 | 0.62, 0.65 |
| Medium               | 1.73  | 1.66, 1.79   | 1.69  | 1.6, 1.78    | 1.76  | 1.62, 1.89   | 1.92  | 1.83, 1.99   | 1.89  | 1.83, 1.94   | 1.93  | 1.87, 1.97   | 2.13  | 2.07, 2.19           | 0.84 | 0.82, 0.85 |
| Small                | 1.61  | 1.52, 1.7    | 1.66  | 1.53, 1.79   | 1.78  | 1.64, 1.9    | 1.89  | 1.77, 2.01   | 1.89  | 1.82, 1.95   | 1.88  | 1.83, 1.93   | 1.99  | 1.92, 2.04           | 0.73 | 0.71, 0.74 |
| Rural                | 1.34  | 1.27, 1.4    | 1.40  | 1.31, 1.47   | 1.68  | 1.58, 1.76   | 1.66  | 1.58, 1.73   | 1.72  | 1.68, 1.76   | 1.75  | 1.71, 1.79   | 1.94  | 1.89, 1.98           | 1.02 | 0.99, 1.04 |
| Rural - Metropolitan | -0.45 | -0.47, -0.42 | -0.37 | -0.39, -0.34 | -0.23 | -0.27, -0.18 | -0.33 | -0.36, -0.29 | -0.20 | -0.21, -0.18 | -0.17 | -0.19, -0.15 | -0.15 | -0.16, -0.13         |      |            |

**Supplementary table 7. GHGE by educational level of the head of household per equivalent adult in kg of CO<sub>2</sub>, 1989, 2020 ENIGHS**

|                               | 1989 |            | 1992 |            | 1994 |            | 1996 |            | 1998 |            | 2000 |            | 2002 |            | 2004 |            | 2006 |            |
|-------------------------------|------|------------|------|------------|------|------------|------|------------|------|------------|------|------------|------|------------|------|------------|------|------------|
|                               | Mean | 95% CI     | Mean | 95% CI     | Mean | 95% CI     | Mean | 95% CI     | Mean | 95% CI     | Mean | 95% CI     | Mean | 95% CI     | Mean | 95% CI     | Mean | 95% CI     |
| No formal education           | 2.88 | 2.62, 3.14 | 2.77 | 2.56, 2.98 | 3.75 | 2.41, 5.09 | 2.67 | 2.5, 2.82  | 2.60 | 2.43, 2.76 | 3.13 | 2.83, 3.43 | 3.34 | 2.98, 3.7  | 3.36 | 3.08, 3.63 | 3.44 | 3.09, 3.78 |
| Completed Pre, Elementary     | 2.95 | 2.77, 3.11 | 3.10 | 2.92, 3.27 | 3.27 | 3.08, 3.45 | 2.98 | 2.8, 3.16  | 3.03 | 2.88, 3.18 | 3.56 | 3.37, 3.75 | 3.94 | 3.58, 4.3  | 3.62 | 3.42, 3.81 | 3.47 | 3.31, 3.63 |
| Completed Elementary          | 3.80 | 3.57, 4.03 | 3.70 | 3.5, 3.88  | 4.09 | 3.83, 4.34 | 3.59 | 3.37, 3.79 | 3.60 | 3.42, 3.77 | 4.45 | 3.91, 4.98 | 4.71 | 4.26, 5.15 | 4.00 | 3.83, 4.16 | 3.65 | 3.49, 3.8  |
| Completed Middle School       | 4.57 | 4.25, 4.88 | 4.43 | 4.15, 4.71 | 4.62 | 4.34, 4.89 | 4.29 | 4, 4.57    | 4.16 | 3.97, 4.35 | 4.64 | 4.35, 4.93 | 4.83 | 4.45, 5.21 | 4.60 | 4.3, 4.89  | 4.20 | 3.96, 4.44 |
| Completed High School         | 5.15 | 4.69, 5.6  | 6.30 | 4.88, 7.72 | 5.85 | 5.34, 6.34 | 4.79 | 4.51, 5.05 | 5.24 | 4.74, 5.74 | 5.22 | 4.66, 5.76 | 5.55 | 5.04, 6.05 | 4.91 | 4.54, 5.28 | 4.26 | 3.91, 4.59 |
| Completed College             | 5.50 | 5.03, 5.97 | 5.94 | 5.3, 6.58  | 7.08 | 6.14, 8.02 | 5.59 | 5.17, 6    | 6.07 | 5.44, 6.69 | 6.50 | 5.82, 7.16 | 6.68 | 5.75, 7.61 | 5.87 | 5.46, 6.26 | 4.99 | 4.57, 5.4  |
| College – no formal education | 2.62 | 2.57, 2.67 | 3.17 | 3.11, 3.22 | 3.33 | 3.10, 3.55 | 2.93 | 2.84, 3.01 | 3.47 | 3.34, 3.59 | 3.36 | 3.22, 3.49 | 3.34 | 3.17, 3.50 | 2.51 | 2.39, 2.62 | 1.56 | 1.42, 1.69 |

**Supplementary table 7. GHGE by educational level of the head of household per equivalent adult in kg of CO<sub>2</sub>, 1989, 2020 ENIGHS**

|                               | 2008 |            | 2010 |            | 2012 |            | 2014 |            | 2016 |            | 2018 |            | 2020 |            | Difference 2020-1989 |              |
|-------------------------------|------|------------|------|------------|------|------------|------|------------|------|------------|------|------------|------|------------|----------------------|--------------|
|                               | Mean | 95% CI     | Mean | 95% CI     | Mean | 95% CI     | Mean | 95% CI     | Mean | 95% CI     | Mean | 95% CI     | Mean | 95% CI     |                      | 95% CI       |
| No formal education           | 3.13 | 2.9, 3.34  | 3.61 | 3.07, 4.13 | 4.11 | 3.71, 4.5  | 4.13 | 3.6, 4.65  | 4.36 | 4.08, 4.63 | 4.57 | 4.26, 4.86 | 4.69 | 4.47, 4.9  | 1.81                 | 1.74, 1.87   |
| Completed Pre, Elementary     | 3.32 | 3.19, 3.44 | 3.51 | 3.29, 3.71 | 4.62 | 3.98, 5.26 | 4.63 | 4.23, 5.03 | 4.74 | 4.45, 5.03 | 4.69 | 4.48, 4.9  | 4.82 | 4.63, 5    | 1.87                 | 1.78, 1.95   |
| Completed Elementary          | 3.48 | 3.33, 3.61 | 3.64 | 3.49, 3.78 | 4.50 | 4.18, 4.81 | 4.44 | 4.12, 4.75 | 4.29 | 4.16, 4.4  | 4.64 | 4.33, 4.94 | 4.72 | 4.57, 4.86 | 0.92                 | 0.85, 0.98   |
| Completed Middle School       | 3.69 | 3.57, 3.81 | 3.97 | 3.8, 4.13  | 4.74 | 3.91, 5.56 | 4.78 | 4.47, 5.08 | 4.31 | 4.18, 4.43 | 4.64 | 4.21, 5.06 | 4.58 | 4.45, 4.69 | 0.01                 | -0.05, 0.07  |
| Completed High School         | 4.09 | 3.89, 4.27 | 4.31 | 4.07, 4.55 | 4.80 | 4.35, 5.24 | 4.94 | 4.61, 5.27 | 4.81 | 4.55, 5.07 | 4.85 | 4.6, 5.09  | 4.95 | 4.78, 5.11 | -0.2                 | -0.26, -0.13 |
| Completed College             | 4.84 | 4.59, 5.09 | 5.27 | 4.9, 5.63  | 6.01 | 5.43, 6.57 | 6.73 | 4.9, 8.55  | 5.66 | 5.28, 6.04 | 5.50 | 5.26, 5.72 | 5.87 | 5.66, 6.06 | 0.37                 | 0.31, 0.42   |
| College – no formal education | 1.72 | 1.64, 1.79 | 1.67 | 1.50, 1.83 | 1.9  | 1.70, 2.10 | 2.61 | 2.33, 2.88 | 1.3  | 1.16, 1.43 | 0.93 | 0.85, 1.00 | 1.18 | 1.14, 1.21 |                      |              |

**Supplementary table 8 GHGE by urbanicity per equivalent adult in kg of CO<sub>2</sub>, 1989, 2020 ENIGHS**

|                      | 1992  |              | 1994 |              | 1996  |              | 1998  |              | 2000  |              | 2002  |              | 2004  |              | 2006  |              |
|----------------------|-------|--------------|------|--------------|-------|--------------|-------|--------------|-------|--------------|-------|--------------|-------|--------------|-------|--------------|
|                      | Mean  | 95% CI       | Mean | 95% CI       | Mean  | 95% CI       | Mean  | 95% CI       | Mean  | 95% CI       | Mean  | 95% CI       | Mean  | 95% CI       | Mean  | 95% CI       |
| Metropolitan         | 4.51  | 4.29, 4.72   | 4.84 | 4.55, 5.12   | 4.31  | 4.12, 4.49   | 4.43  | 4.24, 4.61   | 5.06  | 4.73, 5.37   | 5.14  | 4.89, 5.38   | 4.76  | 4.63, 4.89   | 4.23  | 4.07, 4.37   |
| Medium               | 4.05  | 3.32, 4.78   | 5.40 | 3.61, 7.19   | 3.66  | 3.33, 3.97   | 3.83  | 3.56, 4.08   | 4.45  | 4.15, 4.75   | 4.77  | 4.31, 5.22   | 4.31  | 3.94, 4.67   | 3.87  | 3.69, 4.04   |
| Small                | 3.65  | 2.67, 4.62   | 3.84 | 3.31, 4.36   | 3.30  | 2.89, 3.69   | 3.22  | 2.87, 3.57   | 4.07  | 3.67, 4.46   | 4.53  | 3.77, 5.28   | 3.96  | 3.47, 4.44   | 3.47  | 3.2, 3.74    |
| Rural                | 2.39  | 2.19, 2.57   | 2.63 | 2.45, 2.8    | 2.43  | 2.26, 2.59   | 2.49  | 2.32, 2.66   | 2.92  | 2.72, 3.11   | 3.70  | 3.02, 4.37   | 3.25  | 3.05, 3.43   | 3.30  | 3.09, 3.51   |
| Rural - metropolitan | -2.13 | -2.17, -2.08 | -2.2 | -2.31, -2.08 | -1.88 | -1.96, -1.79 | -1.94 | -2.04, -1.83 | -2.14 | -2.26, -2.01 | -1.44 | -1.70, -1.17 | -1.52 | -1.61, -1.42 | -0.92 | -1.02, -0.81 |

**Supplementary table 8 GHGE by urbanicity per equivalent adult in kg of CO<sub>2</sub>, 1989, 2020 ENIGHS**

|                      | 2008  |              | 2010  |              | 2012  |              | 2014  |              | 2016  |              | 2018  |              | 2020  | Difference 2020-1992 |      |            |
|----------------------|-------|--------------|-------|--------------|-------|--------------|-------|--------------|-------|--------------|-------|--------------|-------|----------------------|------|------------|
|                      | Mean  | 95% CI       | Mean  | 95% CI       | Mean  | 95% CI       | Mean  | 95% CI       | Mean  | 95% CI       | Mean  | 95% CI       | Mean  | 95% CI               |      | 95% CI     |
| Metropolitan         | 4.00  | 3.89, 4.1    | 4.45  | 4.27, 4.62   | 5.25  | 4.71, 5.77   | 5.50  | 4.97, 6.02   | 4.89  | 4.73, 5.04   | 4.91  | 4.77, 5.05   | 5.14  | 5.01, 5.25           | 0.63 | 0.56, 0.69 |
| Medium               | 3.76  | 3.59, 3.93   | 3.93  | 3.73, 4.12   | 4.19  | 3.87, 4.51   | 4.49  | 4.14, 4.84   | 4.56  | 4.33, 4.77   | 4.85  | 4.46, 5.23   | 4.95  | 4.76, 5.13           | 0.90 | 0.84, 0.95 |
| Small                | 3.53  | 3.34, 3.72   | 3.73  | 3.43, 4.01   | 4.41  | 4.05, 4.76   | 4.45  | 4.11, 4.78   | 4.70  | 4.4, 4.99    | 5.19  | 4.27, 6.1    | 4.76  | 4.57, 4.93           | 1.11 | 1.03, 1.18 |
| Rural                | 2.95  | 2.82, 3.07   | 2.99  | 2.84, 3.12   | 4.23  | 3.93, 4.53   | 4.11  | 3.79, 4.42   | 4.02  | 3.89, 4.14   | 4.27  | 4.14, 4.38   | 4.36  | 4.26, 4.45           | 1.97 | 1.89, 2.04 |
| Rural - metropolitan | -1.05 | -1.11, -0.98 | -1.46 | -1.55, -1.36 | -1.01 | -1.26, -0.75 | -1.39 | -1.60, -1.17 | -0.86 | -0.96, -0.75 | -0.65 | -0.73, -0.56 | -0.77 | -0.80, -0.73         |      |            |



**Supplementary table 9. Relative contribution of GHGE by food group in Mexican households, 1989, 2020 ENIGHS**

|                | 1989  |              | 1992  |              | 1994  |              | 1996  |              | 1998  |              | 2000  |              | 2002  |              | 2004  |              | 2006  |
|----------------|-------|--------------|-------|--------------|-------|--------------|-------|--------------|-------|--------------|-------|--------------|-------|--------------|-------|--------------|-------|
| Food group     | Mean  | 95% CI       | Mean  | 95% CI       | Mean  | 95% CI       | Mean  | 95% CI       | Mean  | 95% CI       | Mean  | 95% CI       | Mean  | 95% CI       | Mean  | 95% CI       | Mean  |
| Beef           | 19.89 | 19.18, 20.59 | 20.09 | 19.26, 20.91 | 21.20 | 20.44, 21.95 | 20.47 | 19.82, 21.11 | 21.26 | 20.54, 21.96 | 22.42 | 21.66, 23.16 | 22.90 | 22.13, 23.66 | 22.24 | 21.64, 22.82 | 21.14 |
| Dairy          | 16.87 | 16.3, 17.42  | 17.74 | 17.12, 18.35 | 17.20 | 16.47, 17.93 | 16.40 | 15.85, 16.94 | 16.89 | 16.32, 17.45 | 15.97 | 15.36, 16.58 | 15.86 | 15.32, 16.39 | 15.59 | 15.04, 16.14 | 14.50 |
| Corn           | 9.61  | 9, 10.22     | 8.63  | 7.89, 9.35   | 7.57  | 7.11, 8.02   | 8.98  | 8.42, 9.53   | 7.93  | 7.4, 8.46    | 7.02  | 6.58, 7.45   | 6.89  | 6.32, 7.46   | 6.07  | 5.65, 6.49   | 5.41  |
| Legume         | 7.03  | 6.59, 7.46   | 6.47  | 6.02, 6.92   | 5.84  | 5.46, 6.22   | 6.86  | 6.5, 7.2     | 5.76  | 5.45, 6.07   | 5.04  | 4.7, 5.37    | 4.80  | 4.47, 5.12   | 4.49  | 4.16, 4.8    | 3.79  |
| Beverages      | 6.99  | 6.66, 7.32   | 7.22  | 6.72, 7.71   | 7.73  | 7.31, 8.13   | 6.70  | 6.36, 7.03   | 7.95  | 7.55, 8.34   | 7.55  | 7.13, 7.96   | 7.87  | 7.5, 8.24    | 8.81  | 8.49, 9.11   | 9.65  |
| Sweet or salty | 6.23  | 5.83, 6.61   | 5.00  | 4.53, 5.47   | 4.99  | 4.56, 5.4    | 4.42  | 4.09, 4.75   | 5.30  | 4.92, 5.67   | 5.13  | 4.72, 5.53   | 4.97  | 4.6, 5.34    | 5.86  | 5.48, 6.22   | 5.74  |
| Chicken        | 5.87  | 5.58, 6.15   | 7.92  | 7.54, 8.29   | 8.45  | 7.92, 8.97   | 7.61  | 7.28, 7.92   | 7.51  | 7.16, 7.86   | 8.13  | 7.79, 8.47   | 9.30  | 8.93, 9.65   | 9.68  | 9.29, 10.05  | 10.15 |
| Oil            | 5.46  | 5.19, 5.73   | 5.04  | 4.74, 5.33   | 5.08  | 4.78, 5.36   | 5.14  | 4.89, 5.37   | 4.58  | 4.35, 4.81   | 4.59  | 4.37, 4.8    | 4.03  | 3.8, 4.26    | 3.59  | 3.43, 3.74   | 3.22  |
| Vegetables     | 4.59  | 4.4, 4.77    | 4.36  | 4.14, 4.57   | 4.33  | 4.12, 4.54   | 4.85  | 4.66, 5.04   | 4.51  | 4.32, 4.7    | 4.23  | 4.01, 4.43   | 4.41  | 4.25, 4.55   | 4.14  | 3.97, 4.3    | 4.09  |
| Pork           | 4.00  | 3.77, 4.23   | 3.74  | 3.46, 4.02   | 3.64  | 3.39, 3.88   | 3.68  | 3.45, 3.91   | 3.95  | 3.71, 4.17   | 3.73  | 3.4, 4.05    | 3.01  | 2.76, 3.25   | 2.72  | 2.53, 2.9    | 2.85  |
| Grain          | 3.05  | 2.9, 3.19    | 2.96  | 2.79, 3.12   | 2.59  | 2.46, 2.71   | 2.75  | 2.62, 2.88   | 2.62  | 2.49, 2.74   | 2.46  | 2.28, 2.62   | 2.44  | 2.32, 2.56   | 2.86  | 2.75, 2.96   | 2.87  |
| Seafood        | 2.94  | 2.65, 3.23   | 2.27  | 1.95, 2.58   | 2.46  | 2.11, 2.79   | 2.31  | 2.09, 2.51   | 2.14  | 1.89, 2.38   | 2.73  | 2.25, 3.19   | 3.09  | 2.83, 3.35   | 1.96  | 1.74, 2.17   | 2.73  |
| Egg            | 2.53  | 2.41, 2.65   | 2.63  | 2.48, 2.77   | 2.59  | 2.31, 2.86   | 2.71  | 2.58, 2.82   | 2.70  | 2.56, 2.83   | 2.52  | 2.38, 2.66   | 2.44  | 2.32, 2.55   | 2.78  | 2.63, 2.92   | 2.52  |
| Others         | 2.21  | 2.02, 2.39   | 2.19  | 1.95, 2.41   | 2.25  | 2.07, 2.42   | 2.24  | 2.09, 2.39   | 2.37  | 2.17, 2.55   | 2.26  | 2.04, 2.47   | 1.99  | 1.84, 2.13   | 1.99  | 1.86, 2.1    | 1.89  |
| Fruit          | 1.96  | 1.83, 2.08   | 2.07  | 1.92, 2.2    | 2.32  | 2.15, 2.48   | 2.02  | 1.89, 2.13   | 1.83  | 1.72, 1.94   | 2.39  | 2.24, 2.54   | 1.99  | 1.84, 2.13   | 1.99  | 1.88, 2.09   | 2.21  |
| Fastfood       | 0.73  | 0.61, 0.85   | 1.63  | 1.36, 1.9    | 1.75  | 1.46, 2.03   | 2.83  | 2.52, 3.12   | 2.66  | 2.33, 2.98   | 3.82  | 3.41, 4.21   | 3.97  | 3.55, 4.38   | 5.22  | 4.86, 5.57   | 7.19  |
| Seed           | 0.03  | 0.02, 0.04   | 0.03  | 0.01, 0.04   | 0.03  | 0.02, 0.03   | 0.03  | 0.01, 0.04   | 0.03  | 0.01, 0.03   | 0.02  | 0, 0.02      | 0.02  | 0.01, 0.02   | 0.02  | 0.01, 0.02   | 0.04  |

**Supplementary table 9. Relative contribution of GHGE by food group in Mexican households, 1989, 2020 ENIGHS**

| Food group     | 95% CI       | 2008  | 95% CI       | 2010  | 95% CI       | 2012  | 95% CI       | 2014  | 95% CI       | 2016  | 95% CI      | 2018  | 95% CI       | 2020  | 95% CI       | Difference 2020-1989 |              |
|----------------|--------------|-------|--------------|-------|--------------|-------|--------------|-------|--------------|-------|-------------|-------|--------------|-------|--------------|----------------------|--------------|
|                |              | Mean  |              | Mean  |              | Mean  |              | Mean  |              | Mean  |             | Mean  |              | Mean  |              | 95% CI               |              |
| Beef           | 20.58, 21.7  | 21.57 | 21.16, 21.98 | 21.56 | 21.14, 21.97 | 19.48 | 18.83, 20.11 | 17.95 | 17.56, 18.34 | 16.78 | 16.55, 17   | 17.18 | 16.94, 17.41 | 17.68 | 17.46, 17.89 | -2.21                | -3.0, -1.42  |
| Dairy          | 14.12, 14.88 | 14.30 | 14, 14.6     | 14.15 | 13.85, 14.44 | 13.88 | 13.37, 14.39 | 13.92 | 13.56, 14.28 | 13.43 | 13.24, 13.6 | 12.72 | 12.54, 12.89 | 11.21 | 11.06, 11.36 | -5.66                | -6.39, -4.93 |
| Corn           | 5.15, 5.67   | 5.80  | 5.52, 6.07   | 5.69  | 5.45, 5.91   | 5.92  | 5.53, 6.29   | 5.97  | 5.72, 6.21   | 5.54  | 5.4, 5.67   | 5.55  | 5.41, 5.68   | 5.45  | 5.33, 5.56   | -4.16                | -4.73, -3.59 |
| Legume         | 3.58, 3.99   | 4.18  | 4.02, 4.33   | 4.07  | 3.9, 4.24    | 3.74  | 3.52, 3.96   | 4.08  | 3.91, 4.25   | 3.58  | 3.48, 3.67  | 3.48  | 3.39, 3.56   | 3.21  | 3.12, 3.29   | -3.82                | -4.31, -3.33 |
| Beverages      | 9.28, 10.01  | 9.68  | 9.41, 9.93   | 9.61  | 9.33, 9.89   | 9.76  | 9.34, 10.17  | 9.81  | 9.52, 10.09  | 10.04 | 9.88, 10.2  | 9.61  | 9.45, 9.76   | 10.09 | 9.94, 10.23  | 3.1                  | 2.58, 3.62   |
| Sweet or salty | 5.34, 6.13   | 5.26  | 5.01, 5.5    | 5.47  | 5.23, 5.69   | 6.76  | 6.28, 7.23   | 6.35  | 6.01, 6.68   | 6.12  | 5.95, 6.28  | 5.74  | 5.57, 5.9    | 4.98  | 4.85, 5.11   | -1.25                | -1.72, -0.78 |
| Chicken        | 9.81, 10.49  | 10.42 | 10.16, 10.66 | 9.53  | 9.27, 9.78   | 8.72  | 8.33, 9.09   | 9.12  | 8.86, 9.36   | 10.15 | 9.99, 10.3  | 10.23 | 10.07, 10.38 | 10.04 | 9.9, 10.17   | 4.17                 | 3.69, 4.65   |
| Oil            | 3.07, 3.36   | 3.51  | 3.38, 3.63   | 3.53  | 3.39, 3.66   | 3.02  | 2.86, 3.18   | 3.27  | 3.14, 3.39   | 3.11  | 3.04, 3.17  | 3.12  | 3.05, 3.17   | 2.99  | 2.93, 3.04   | -2.47                | -2.91, -2.03 |
| Vegetables     | 3.9, 4.28    | 4.40  | 4.29, 4.5    | 4.55  | 4.42, 4.67   | 4.36  | 4.16, 4.54   | 4.65  | 4.51, 4.77   | 4.49  | 4.41, 4.56  | 4.37  | 4.31, 4.43   | 4.47  | 4.4, 4.53    | -0.12                | -0.53, 0.29  |
| Pork           | 2.68, 3.02   | 2.79  | 2.63, 2.94   | 2.82  | 2.68, 2.95   | 2.83  | 2.61, 3.03   | 2.77  | 2.61, 2.92   | 3.28  | 3.18, 3.37  | 3.56  | 3.45, 3.65   | 3.89  | 3.79, 3.97   | -0.11                | -0.5, 0.28   |
| Grain          | 2.76, 2.98   | 3.02  | 2.93, 3.11   | 3.05  | 2.94, 3.15   | 2.96  | 2.81, 3.09   | 2.96  | 2.87, 3.05   | 2.87  | 2.81, 2.92  | 2.75  | 2.7, 2.8     | 2.48  | 2.44, 2.52   | -0.57                | -0.91, -0.23 |
| Seafood        | 2.42, 3.04   | 2.66  | 2.49, 2.83   | 2.67  | 2.52, 2.82   | 2.65  | 2.35, 2.93   | 2.42  | 2.25, 2.59   | 2.63  | 2.51, 2.74  | 2.44  | 2.34, 2.54   | 2.49  | 2.39, 2.57   | -0.45                | -0.78, -0.12 |
| Egg            | 2.38, 2.64   | 2.87  | 2.78, 2.96   | 3.00  | 2.89, 3.09   | 2.25  | 2.13, 2.35   | 2.54  | 2.46, 2.61   | 2.72  | 2.67, 2.77  | 2.86  | 2.8, 2.91    | 2.83  | 2.78, 2.88   | 0.3                  | -0.01, 0.61  |
| Others         | 1.76, 2.02   | 1.84  | 1.73, 1.94   | 1.87  | 1.73, 2      | 2.07  | 1.89, 2.24   | 1.73  | 1.62, 1.83   | 1.76  | 1.69, 1.82  | 1.82  | 1.75, 1.87   | 1.91  | 1.84, 1.97   | -0.3                 | -0.59, -0.01 |
| Fruit          | 2.07, 2.34   | 2.07  | 2, 2.14      | 2.01  | 1.92, 2.09   | 2.19  | 2.03, 2.34   | 2.15  | 2.05, 2.23   | 2.19  | 2.13, 2.24  | 2.05  | 1.99, 2.1    | 2.06  | 2.01, 2.1    | 0.1                  | -0.17, 0.37  |
| Fastfood       | 6.8, 7.56    | 5.60  | 5.31, 5.88   | 6.40  | 6.1, 6.68    | 9.38  | 8.8, 9.94    | 10.27 | 9.85, 10.68  | 11.27 | 11, 11.53   | 12.48 | 12.2, 12.75  | 14.17 | 13.9, 14.43  | 13.44                | 13.16, 13.72 |
| Seed           | 0.02, 0.05   | 0.03  | 0.01, 0.03   | 0.03  | 0.02, 0.03   | 0.05  | 0.02, 0.07   | 0.04  | 0.02, 0.04   | 0.04  | 0.03, 0.04  | 0.04  | 0.03, 0.04   | 0.04  | 0.03, 0.04   | 0.01                 | -0.02, 0.04  |

**Supplementary table 10. Relative contribution of GHGE by food group among households with no formal education, 1989, 2020 ENIGHS.**

|                | 1989  |              | 1992  |              | 1994  |              | 1996  |              | 1998  |              | 2000  |              | 2002  |              | 2004  |              | 2006  |
|----------------|-------|--------------|-------|--------------|-------|--------------|-------|--------------|-------|--------------|-------|--------------|-------|--------------|-------|--------------|-------|
| Food group     | Mean  | 95% CI       | Mean  | 95% CI       | Mean  | 95% CI       | Mean  | 95% CI       | Mean  | 95% CI       | Mean  | 95% CI       | Mean  | 95% CI       | Mean  | 95% CI       | Mean  |
| Beef           | 12.06 | 10.52, 13.59 | 11.20 | 9.9, 12.49   | 12.76 | 11.35, 14.15 | 13.70 | 12.46, 14.93 | 12.33 | 10.89, 13.77 | 13.61 | 11.98, 15.23 | 16.42 | 14.77, 18.07 | 15.94 | 14.15, 17.71 | 14.58 |
| Dairy          | 13.25 | 12.02, 14.47 | 14.03 | 12.43, 15.63 | 12.76 | 11.55, 13.95 | 13.02 | 11.85, 14.17 | 11.61 | 10.23, 12.99 | 11.27 | 10.15, 12.39 | 11.23 | 10.11, 12.35 | 11.88 | 10.85, 12.9  | 10.50 |
| Corn           | 15.81 | 14.07, 17.55 | 14.59 | 12.91, 16.25 | 13.18 | 11.92, 14.43 | 15.26 | 13.88, 16.63 | 14.73 | 13.09, 16.35 | 13.78 | 12.16, 15.39 | 12.56 | 10.73, 14.37 | 11.47 | 10.28, 12.66 | 10.70 |
| Legume         | 11.61 | 10.34, 12.87 | 11.11 | 9.83, 12.39  | 9.91  | 9.01, 10.79  | 10.76 | 9.98, 11.53  | 10.84 | 9.86, 11.81  | 9.67  | 8.28, 11.06  | 9.19  | 8.05, 10.32  | 8.75  | 7.66, 9.82   | 7.56  |
| Beverages      | 8.12  | 7.23, 8.99   | 8.73  | 7.63, 9.82   | 9.25  | 8.2, 10.29   | 7.02  | 6.14, 7.9    | 9.31  | 8.01, 10.59  | 8.10  | 6.9, 9.29    | 7.79  | 6.55, 9.03   | 8.72  | 7.63, 9.8    | 9.77  |
| Sweet or salty | 5.42  | 4.68, 6.15   | 4.54  | 3.6, 5.48    | 5.06  | 3.72, 6.39   | 3.67  | 3.11, 4.22   | 5.38  | 4.27, 6.48   | 4.71  | 3.59, 5.81   | 4.43  | 3.43, 5.42   | 5.00  | 4.21, 5.78   | 5.24  |
| Chicken        | 4.57  | 4, 5.12      | 6.62  | 5.82, 7.4    | 6.96  | 6.04, 7.87   | 6.78  | 6.09, 7.46   | 5.68  | 4.97, 6.39   | 7.45  | 6.6, 8.3     | 9.00  | 8.06, 9.93   | 9.42  | 8.36, 10.48  | 10.93 |
| Oil            | 7.05  | 6.28, 7.81   | 7.56  | 6.77, 8.34   | 6.85  | 6.08, 7.61   | 6.30  | 5.71, 6.89   | 6.30  | 5.51, 7.07   | 6.07  | 5.48, 6.65   | 6.12  | 5.34, 6.89   | 5.20  | 4.65, 5.74   | 4.71  |
| Vegetables     | 4.71  | 4.28, 5.14   | 4.74  | 4.28, 5.18   | 4.75  | 4.3, 5.2     | 5.38  | 4.89, 5.86   | 5.28  | 4.67, 5.87   | 4.94  | 4.34, 5.54   | 5.04  | 4.62, 5.44   | 4.91  | 4.41, 5.4    | 4.90  |
| Pork           | 3.84  | 3.28, 4.39   | 3.43  | 2.86, 3.99   | 3.58  | 2.91, 4.24   | 3.47  | 2.88, 4.05   | 3.60  | 2.87, 4.31   | 3.29  | 2.51, 4.06   | 2.61  | 2.15, 3.05   | 2.79  | 2.14, 3.44   | 2.79  |
| Grain          | 3.29  | 2.89, 3.67   | 3.55  | 3.14, 3.95   | 3.12  | 2.72, 3.5    | 3.25  | 2.85, 3.64   | 3.27  | 2.91, 3.62   | 3.60  | 2.8, 4.39    | 2.79  | 2.51, 3.05   | 3.49  | 3.15, 3.83   | 3.80  |
| Seafood        | 2.70  | 2.02, 3.36   | 1.85  | 1.36, 2.32   | 2.78  | 1.76, 3.79   | 2.32  | 1.91, 2.72   | 2.15  | 1.45, 2.84   | 2.75  | 1.87, 3.62   | 3.25  | 2.43, 4.06   | 1.78  | 1.35, 2.2    | 2.92  |
| Egg            | 2.51  | 2.21, 2.8    | 2.71  | 2.4, 3       | 3.03  | 2.39, 3.67   | 2.96  | 2.68, 3.23   | 3.07  | 2.65, 3.49   | 3.12  | 2.7, 3.53    | 3.30  | 2.93, 3.66   | 3.55  | 3.15, 3.95   | 2.99  |
| Others         | 3.03  | 2.51, 3.55   | 2.99  | 2.38, 3.59   | 2.83  | 2.31, 3.34   | 2.98  | 2.47, 3.49   | 3.11  | 2.36, 3.85   | 2.72  | 2.18, 3.24   | 2.08  | 1.79, 2.36   | 2.27  | 1.84, 2.68   | 2.13  |
| Fruit          | 1.48  | 1.22, 1.72   | 1.47  | 1.23, 1.7    | 1.77  | 1.51, 2.01   | 1.58  | 1.3, 1.85    | 1.45  | 1.15, 1.73   | 1.83  | 1.45, 2.2    | 1.44  | 1.24, 1.63   | 1.52  | 1.21, 1.82   | 1.81  |
| Fastfood       | 0.52  | 0.32, 0.7    | 0.84  | 0.53, 1.15   | 1.39  | 0.76, 2.02   | 1.51  | 1.07, 1.95   | 1.85  | 1.1, 2.58    | 3.07  | 1.94, 4.19   | 2.74  | 1.78, 3.7    | 3.26  | 2.5, 4       | 4.63  |
| Seed           | 0.04  | 0.01, 0.05   | 0.05  | 0.01, 0.07   | 0.03  | 0.01, 0.03   | 0.04  | 0, 0.06      | 0.04  | 0.01, 0.07   | 0.01  | 0, 0.02      | 0.02  | 0, 0.02      | 0.04  | 0, 0.07      | 0.04  |

**Supplementary table 10. Relative contribution of GHGE by food group among households with no formal education, 1989, 2020 ENIGHS.**

| Food group     | 2008         |       | 2010         |       | 2012         |       | 2014         |       | 2016         |       | 2018         |       | 2020         |       | Difference 2020-1989 |       |              |
|----------------|--------------|-------|--------------|-------|--------------|-------|--------------|-------|--------------|-------|--------------|-------|--------------|-------|----------------------|-------|--------------|
|                | 95% CI       | Mean  | 95% CI       | Mean  | 95% CI       | Mean  | 95% CI       | Mean  | 95% CI       | Mean  | 95% CI       | Mean  | 95% CI       |       | 95% CI               |       |              |
| Beef           | 13.26, 15.89 | 16.54 | 15.38, 17.68 | 16.41 | 15.18, 17.63 | 12.64 | 10.9, 14.36  | 11.88 | 10.71, 13.04 | 11.43 | 10.77, 12.08 | 10.76 | 10.09, 11.41 | 12.24 | 11.62, 12.84         | 0.18  | -0.46, 0.82  |
| Dairy          | 9.61, 11.37  | 11.57 | 10.7, 12.43  | 11.14 | 10.37, 11.89 | 11.02 | 9.64, 12.39  | 10.20 | 9.33, 11.05  | 10.81 | 10.23, 11.38 | 10.10 | 9.58, 10.61  | 9.26  | 8.79, 9.72           | -3.99 | -4.65, -3.33 |
| Corn           | 9.57, 11.82  | 9.92  | 9.12, 10.71  | 10.81 | 9.83, 11.77  | 12.53 | 11.05, 14.01 | 13.19 | 12.06, 14.3  | 10.83 | 10.22, 11.44 | 11.61 | 10.84, 12.36 | 10.61 | 10.06, 11.16         | -5.2  | -5.91, -4.49 |
| Legume         | 6.77, 8.34   | 7.64  | 7.03, 8.24   | 7.85  | 7.18, 8.52   | 7.42  | 6.31, 8.53   | 8.58  | 7.73, 9.42   | 6.95  | 6.45, 7.44   | 7.13  | 6.68, 7.56   | 6.08  | 5.68, 6.47           | -5.53 | -6.15, -4.91 |
| Beverages      | 8.81, 10.72  | 9.59  | 8.77, 10.4   | 8.99  | 8.23, 9.75   | 9.11  | 7.9, 10.31   | 9.64  | 8.79, 10.49  | 10.09 | 9.54, 10.63  | 9.62  | 9.08, 10.15  | 10.06 | 9.55, 10.55          | 1.94  | 1.39, 2.49   |
| Sweet or salty | 4.2, 6.27    | 4.26  | 3.69, 4.82   | 4.59  | 3.97, 5.2    | 5.65  | 4.53, 6.75   | 4.75  | 4.02, 5.48   | 5.53  | 5.03, 6.03   | 5.05  | 4.6, 5.49    | 4.72  | 4.31, 5.13           | -0.7  | -1.14, -0.26 |
| Chicken        | 9.9, 11.94   | 10.61 | 9.84, 11.38  | 9.83  | 8.97, 10.69  | 8.27  | 7.13, 9.4    | 8.58  | 7.82, 9.33   | 9.95  | 9.41, 10.48  | 9.38  | 8.87, 9.88   | 9.90  | 9.43, 10.36          | 5.33  | 4.89, 5.77   |
| Oil            | 4.21, 5.2    | 4.53  | 4.11, 4.94   | 4.97  | 4.37, 5.57   | 3.73  | 3.19, 4.25   | 3.80  | 3.41, 4.19   | 3.60  | 3.38, 3.81   | 3.66  | 3.42, 3.88   | 3.46  | 3.23, 3.67           | -3.59 | -4.08, -3.1  |
| Vegetables     | 4.38, 5.42   | 5.00  | 4.67, 5.31   | 5.37  | 5, 5.74      | 5.17  | 4.65, 5.68   | 5.32  | 4.71, 5.92   | 4.95  | 4.72, 5.18   | 5.02  | 4.73, 5.29   | 4.80  | 4.59, 5.01           | 0.09  | -0.33, 0.51  |
| Pork           | 2.32, 3.26   | 2.54  | 2.17, 2.9    | 2.53  | 2.1, 2.95    | 2.18  | 1.56, 2.78   | 2.12  | 1.72, 2.51   | 3.01  | 2.72, 3.29   | 2.96  | 2.66, 3.25   | 3.41  | 3.13, 3.69           | -0.43 | -0.81, -0.05 |
| Grain          | 3.4, 4.2     | 4.02  | 3.61, 4.42   | 3.78  | 3.44, 4.11   | 3.92  | 3.26, 4.57   | 3.71  | 3.32, 4.1    | 3.61  | 3.36, 3.84   | 3.31  | 3.12, 3.48   | 2.97  | 2.8, 3.14            | -0.32 | -0.67, 0.03  |
| Seafood        | 2.09, 3.73   | 2.79  | 2.17, 3.4    | 2.37  | 1.98, 2.75   | 2.98  | 2.12, 3.83   | 2.53  | 2.03, 3.03   | 2.84  | 2.48, 3.18   | 2.68  | 2.36, 2.99   | 2.65  | 2.33, 2.95           | -0.05 | -0.37, 0.27  |
| Egg            | 2.7, 3.28    | 3.63  | 3.3, 3.95    | 3.68  | 3.37, 3.97   | 2.87  | 2.44, 3.28   | 2.94  | 2.62, 3.25   | 3.24  | 3.04, 3.44   | 3.18  | 3, 3.34      | 3.31  | 3.08, 3.52           | 0.8   | 0.49, 1.11   |
| Others         | 1.77, 2.48   | 1.94  | 1.55, 2.33   | 2.19  | 1.66, 2.7    | 2.40  | 1.72, 3.08   | 1.63  | 1.3, 1.95    | 1.84  | 1.64, 2.03   | 1.86  | 1.57, 2.14   | 1.65  | 1.47, 1.81           | -1.38 | -1.71, -1.05 |
| Fruit          | 1.42, 2.19   | 1.73  | 1.51, 1.95   | 1.52  | 1.31, 1.71   | 1.72  | 1.32, 2.1    | 1.89  | 1.6, 2.17    | 1.99  | 1.78, 2.19   | 1.77  | 1.56, 1.98   | 1.75  | 1.6, 1.9             | 0.27  | 0.03, 0.51   |
| Fastfood       | 3.9, 5.35    | 3.68  | 3.1, 4.24    | 3.95  | 3.28, 4.61   | 8.34  | 6.77, 9.9    | 9.17  | 7.91, 10.42  | 9.27  | 8.51, 10.02  | 11.87 | 11, 12.72    | 13.08 | 12.23, 13.92         | 12.56 | 12.3, 12.82  |
| Seed           | 0.01, 0.06   | 0.02  | 0, 0.02      | 0.02  | 0, 0.03      | 0.06  | 0, 0.11      | 0.05  | 0.02, 0.07   | 0.05  | 0.02, 0.06   | 0.06  | 0.04, 0.08   | 0.03  | 0.02, 0.04           | -0.01 | -0.05, 0.03  |

**Supplementary table 11. Relative contribution of GHGE by food group among households with a completed pre, elementary education, 1989, 2020 ENIGHS.**

|                | 1989  |              | 1992  |              | 1994  |              | 1996  |              | 1998  |              | 2000  |              | 2002  |              | 2004  |              | 2006  |
|----------------|-------|--------------|-------|--------------|-------|--------------|-------|--------------|-------|--------------|-------|--------------|-------|--------------|-------|--------------|-------|
| Food group     | Mean  | 95% CI       | Mean  | 95% CI       | Mean  | 95% CI       | Mean  | 95% CI       | Mean  | 95% CI       | Mean  | 95% CI       | Mean  | 95% CI       | Mean  | 95% CI       | Mean  |
| Beef           | 16.08 | 14.9, 17.26  | 17.01 | 15.72, 18.29 | 17.76 | 16.42, 19.09 | 16.35 | 15.34, 17.35 | 17.64 | 16.37, 18.91 | 19.03 | 17.77, 20.28 | 20.52 | 19.42, 21.61 | 19.34 | 18.05, 20.63 | 22.25 |
| Dairy          | 13.63 | 12.78, 14.48 | 15.15 | 13.92, 16.37 | 14.48 | 13.45, 15.5  | 13.44 | 12.68, 14.18 | 14.22 | 13.24, 15.2  | 13.85 | 12.84, 14.85 | 13.88 | 12.89, 14.85 | 13.91 | 12.89, 14.93 | 14.00 |
| Corn           | 12.63 | 11.58, 13.68 | 11.25 | 9.98, 12.5   | 10.25 | 9.52, 10.98  | 12.43 | 11.46, 13.4  | 11.31 | 10.26, 12.35 | 10.03 | 9.13, 10.91  | 9.18  | 8.49, 9.86   | 8.61  | 7.71, 9.5    | 5.73  |
| Legume         | 9.18  | 8.38, 9.97   | 8.27  | 7.54, 8.98   | 7.63  | 7.04, 8.21   | 9.66  | 8.98, 10.32  | 7.99  | 7.32, 8.66   | 7.10  | 6.42, 7.76   | 6.54  | 5.93, 7.13   | 6.24  | 5.66, 6.8    | 3.99  |
| Beverages      | 8.13  | 7.47, 8.77   | 7.72  | 6.79, 8.64   | 8.59  | 7.82, 9.35   | 7.47  | 6.84, 8.08   | 8.16  | 7.41, 8.9    | 8.17  | 7.45, 8.89   | 8.26  | 7.55, 8.96   | 9.33  | 8.28, 10.36  | 8.94  |
| Sweet or salty | 5.40  | 4.79, 5.99   | 4.37  | 3.61, 5.12   | 4.04  | 3.51, 4.57   | 3.54  | 3.16, 3.92   | 4.42  | 3.83, 5      | 4.27  | 3.67, 4.85   | 4.52  | 3.88, 5.15   | 4.44  | 3.9, 4.96    | 5.54  |
| Chicken        | 5.27  | 4.69, 5.84   | 7.73  | 7.09, 8.36   | 8.56  | 7.89, 9.22   | 7.22  | 6.67, 7.76   | 7.21  | 6.67, 7.73   | 7.81  | 7.21, 8.4    | 9.36  | 8.65, 10.06  | 9.62  | 9, 10.24     | 10.57 |
| Oil            | 6.67  | 6.14, 7.18   | 5.85  | 5.3, 6.38    | 6.19  | 5.63, 6.74   | 6.24  | 5.79, 6.69   | 5.34  | 4.91, 5.75   | 5.50  | 5, 5.98      | 4.91  | 4.44, 5.36   | 4.57  | 4.18, 4.95   | 3.17  |
| Vegetables     | 4.70  | 4.34, 5.05   | 4.61  | 4.14, 5.06   | 4.57  | 4.26, 4.86   | 5.03  | 4.64, 5.4    | 4.88  | 4.47, 5.29   | 4.24  | 3.9, 4.57    | 4.81  | 4.48, 5.13   | 4.46  | 4.02, 4.89   | 4.17  |
| Pork           | 4.03  | 3.64, 4.42   | 4.10  | 3.56, 4.62   | 3.99  | 3.58, 4.39   | 3.62  | 3.21, 4.02   | 3.89  | 3.48, 4.28   | 3.76  | 3.24, 4.27   | 2.91  | 2.32, 3.49   | 2.87  | 2.53, 3.2    | 3.19  |
| Grain          | 3.55  | 3.29, 3.81   | 3.48  | 3.17, 3.79   | 2.95  | 2.71, 3.18   | 3.16  | 2.96, 3.35   | 2.97  | 2.73, 3.21   | 2.78  | 2.51, 3.05   | 2.71  | 2.5, 2.92    | 3.23  | 2.96, 3.48   | 3.02  |
| Seafood        | 3.10  | 2.51, 3.69   | 2.24  | 1.72, 2.74   | 2.18  | 1.78, 2.57   | 2.43  | 2, 2.84      | 2.14  | 1.74, 2.53   | 2.90  | 2.14, 3.65   | 2.86  | 2.31, 3.4    | 2.18  | 1.67, 2.67   | 2.31  |
| Egg            | 2.65  | 2.42, 2.88   | 2.84  | 2.56, 3.11   | 3.06  | 2.51, 3.6    | 2.96  | 2.72, 3.19   | 3.18  | 2.92, 3.43   | 3.10  | 2.76, 3.43   | 2.77  | 2.52, 3.01   | 3.35  | 3.02, 3.67   | 2.82  |
| Others         | 2.69  | 2.31, 3.06   | 2.27  | 1.91, 2.62   | 2.46  | 2.14, 2.77   | 2.44  | 2.17, 2.71   | 2.93  | 2.42, 3.44   | 1.99  | 1.7, 2.27    | 2.13  | 1.76, 2.48   | 2.00  | 1.75, 2.24   | 1.61  |
| Fruit          | 1.66  | 1.46, 1.86   | 1.81  | 1.54, 2.07   | 1.82  | 1.61, 2.02   | 1.53  | 1.38, 1.68   | 1.45  | 1.26, 1.63   | 2.01  | 1.73, 2.27   | 1.58  | 1.42, 1.73   | 1.58  | 1.37, 1.79   | 2.03  |
| Fastfood       | 0.56  | 0.34, 0.78   | 1.27  | 0.78, 1.76   | 1.44  | 1.08, 1.79   | 2.43  | 1.98, 2.87   | 2.23  | 1.54, 2.9    | 3.45  | 2.64, 4.25   | 3.04  | 2.48, 3.6    | 4.25  | 3.64, 4.86   | 6.64  |
| Seed           | 0.05  | 0.01, 0.08   | 0.04  | 0.01, 0.07   | 0.03  | 0.01, 0.04   | 0.06  | 0.01, 0.09   | 0.03  | 0, 0.05      | 0.02  | 0, 0.04      | 0.03  | 0.01, 0.03   | 0.02  | 0, 0.02      | 0.03  |

**Supplementary table 11. Relative contribution of GHGE by food group among households with a completed pre, elementary education, 1989, 2020 ENIGHS.**

| Food group     | 95% CI       | 2008  |              | 2010  |              | 2012  |              | 2014  |              | 2016  |              | 2018  |              | 2020  |              | Difference 2020-1989 |              |
|----------------|--------------|-------|--------------|-------|--------------|-------|--------------|-------|--------------|-------|--------------|-------|--------------|-------|--------------|----------------------|--------------|
|                |              | Mean  | 95% CI       | Mean  | 95% CI       | Mean  | 95% CI       | Mean  | 95% CI       | Mean  | 95% CI       | Mean  | 95% CI       | Mean  | 95% CI       |                      | 95% CI       |
| Beef           | 21.11, 23.37 | 18.98 | 18.18, 19.76 | 18.55 | 17.73, 19.36 | 15.48 | 14.27, 16.67 | 14.45 | 13.63, 15.26 | 13.56 | 13.09, 14.03 | 13.40 | 12.93, 13.86 | 13.81 | 13.37, 14.25 | -2.27                | -2.99, -1.55 |
| Dairy          | 13.32, 14.66 | 12.84 | 12.11, 13.55 | 12.63 | 11.97, 13.27 | 12.18 | 11.21, 13.13 | 12.33 | 11.61, 13.04 | 12.10 | 11.72, 12.47 | 11.42 | 11.06, 11.78 | 10.45 | 10.13, 10.76 | -3.18                | -3.85, -2.51 |
| Corn           | 5.3, 6.14    | 8.57  | 7.9, 9.23    | 8.31  | 7.79, 8.82   | 8.58  | 7.73, 9.42   | 9.48  | 8.8, 10.15   | 8.79  | 8.4, 9.17    | 8.63  | 8.29, 8.96   | 8.53  | 8.18, 8.88   | -4.1                 | -4.75, -3.45 |
| Legume         | 3.66, 4.3    | 5.77  | 5.41, 6.12   | 6.00  | 5.62, 6.37   | 6.18  | 5.55, 6.81   | 6.07  | 5.63, 6.5    | 5.51  | 5.27, 5.74   | 5.46  | 5.23, 5.69   | 5.02  | 4.79, 5.24   | -4.16                | -4.72, -3.6  |
| Beverages      | 8.42, 9.45   | 9.21  | 8.68, 9.72   | 9.35  | 8.78, 9.92   | 8.63  | 7.86, 9.39   | 9.12  | 8.59, 9.65   | 9.73  | 9.37, 10.08  | 9.49  | 9.14, 9.82   | 10.20 | 9.88, 10.51  | 2.07                 | 1.52, 2.62   |
| Sweet or salty | 4.88, 6.19   | 4.81  | 4.37, 5.23   | 4.67  | 4.22, 5.1    | 6.19  | 5.29, 7.09   | 5.97  | 5.31, 6.62   | 5.58  | 5.24, 5.9    | 5.32  | 5, 5.64      | 4.93  | 4.64, 5.22   | -0.47                | -0.91, -0.03 |
| Chicken        | 10.01, 11.12 | 10.74 | 10.17, 11.31 | 9.78  | 9.23, 10.32  | 8.89  | 7.97, 9.81   | 9.30  | 8.7, 9.9     | 10.45 | 10.07, 10.82 | 10.18 | 9.84, 10.52  | 10.03 | 9.7, 10.35   | 4.76                 | 4.3, 5.22    |
| Oil            | 2.89, 3.44   | 4.23  | 3.94, 4.51   | 4.38  | 4.04, 4.71   | 3.84  | 3.45, 4.22   | 3.70  | 3.43, 3.96   | 3.48  | 3.32, 3.63   | 3.47  | 3.33, 3.61   | 3.37  | 3.24, 3.5    | -3.3                 | -3.78, -2.82 |
| Vegetables     | 3.89, 4.44   | 4.86  | 4.62, 5.09   | 4.95  | 4.7, 5.2     | 4.88  | 4.4, 5.34    | 5.02  | 4.73, 5.31   | 4.93  | 4.75, 5.1    | 4.72  | 4.57, 4.86   | 4.63  | 4.47, 4.78   | -0.07                | -0.49, 0.35  |
| Pork           | 2.77, 3.6    | 2.82  | 2.48, 3.14   | 3.00  | 2.62, 3.37   | 3.04  | 2.57, 3.49   | 2.86  | 2.53, 3.18   | 3.29  | 3.08, 3.49   | 3.34  | 3.14, 3.53   | 3.78  | 3.57, 3.98   | -0.25                | -0.64, 0.14  |
| Grain          | 2.82, 3.21   | 3.38  | 3.19, 3.56   | 3.63  | 3.36, 3.9    | 3.59  | 3.28, 3.9    | 3.35  | 3.16, 3.54   | 3.26  | 3.13, 3.38   | 3.05  | 2.93, 3.16   | 2.77  | 2.67, 2.87   | -0.78                | -1.14, -0.42 |
| Seafood        | 1.94, 2.67   | 2.71  | 2.37, 3.04   | 2.54  | 2.19, 2.87   | 2.95  | 2.35, 3.54   | 2.64  | 2.2, 3.07    | 2.94  | 2.64, 3.22   | 2.67  | 2.42, 2.91   | 2.69  | 2.47, 2.9    | -0.41                | -0.75, -0.07 |
| Egg            | 2.37, 3.25   | 3.26  | 3.04, 3.47   | 3.64  | 3.41, 3.85   | 2.62  | 2.37, 2.87   | 2.89  | 2.7, 3.07    | 3.10  | 2.97, 3.23   | 3.24  | 3.11, 3.37   | 3.12  | 2.99, 3.24   | 0.47                 | 0.15, 0.79   |
| Others         | 1.39, 1.83   | 1.81  | 1.59, 2.02   | 1.81  | 1.58, 2.04   | 2.22  | 1.81, 2.63   | 1.58  | 1.32, 1.82   | 1.59  | 1.46, 1.71   | 1.70  | 1.56, 1.83   | 1.87  | 1.72, 2      | -0.82                | -1.13, -0.51 |
| Fruit          | 1.73, 2.33   | 1.61  | 1.48, 1.73   | 1.74  | 1.58, 1.9    | 2.09  | 1.81, 2.36   | 1.80  | 1.6, 1.98    | 1.86  | 1.75, 1.95   | 1.79  | 1.65, 1.91   | 1.77  | 1.66, 1.88   | 0.11                 | -0.14, 0.36  |
| Fastfood       | 5.7, 7.56    | 4.36  | 3.88, 4.82   | 4.97  | 4.41, 5.52   | 8.58  | 7.44, 9.71   | 9.39  | 8.5, 10.27   | 9.79  | 9.28, 10.28  | 12.06 | 11.44, 12.66 | 12.97 | 12.44, 13.49 | 12.41                | 12.15, 12.67 |
| Seed           | 0.01, 0.04   | 0.05  | 0.01, 0.09   | 0.03  | 0.01, 0.05   | 0.05  | 0.01, 0.07   | 0.04  | 0.01, 0.07   | 0.05  | 0.03, 0.05   | 0.05  | 0.04, 0.05   | 0.04  | 0.03, 0.04   | -0.01                | -0.05, 0.03  |

**Supplementary table 12. Relative contribution of GHGE by food group among households with a completed elementary education, 1989, 2020 ENIGHS.**

|                | 1989  |              | 1992  |              | 1994  |              | 1996  |              | 1998  |              | 2000  |              | 2002  |              | 2004  |              | 2006  |
|----------------|-------|--------------|-------|--------------|-------|--------------|-------|--------------|-------|--------------|-------|--------------|-------|--------------|-------|--------------|-------|
| Food group     | Mean  | 95% CI       | Mean  | 95% CI       | Mean  | 95% CI       | Mean  | 95% CI       | Mean  | 95% CI       | Mean  | 95% CI       | Mean  | 95% CI       | Mean  | 95% CI       | Mean  |
| Beef           | 22.99 | 21.71, 24.25 | 21.97 | 20.62, 23.31 | 23.99 | 22.8, 25.18  | 22.36 | 21.29, 23.43 | 22.93 | 21.82, 24.04 | 24.69 | 23.43, 25.93 | 24.77 | 23.59, 25.93 | 23.10 | 21.99, 24.21 | 20.84 |
| Dairy          | 17.74 | 16.86, 18.61 | 18.49 | 17.31, 19.66 | 18.66 | 17.09, 20.22 | 16.53 | 15.74, 17.31 | 17.27 | 16.29, 18.24 | 15.62 | 14.78, 16.46 | 15.85 | 15.04, 16.66 | 15.02 | 14.17, 15.85 | 13.72 |
| Corn           | 7.36  | 6.64, 8.08   | 7.37  | 6.53, 8.19   | 5.69  | 5.19, 6.19   | 8.17  | 7.39, 8.94   | 6.74  | 6.18, 7.3    | 6.09  | 5.6, 6.58    | 6.10  | 5.54, 6.65   | 5.92  | 5.23, 6.6    | 6.06  |
| Legume         | 5.58  | 5.07, 6.09   | 5.58  | 4.83, 6.33   | 4.91  | 4.51, 5.31   | 6.26  | 5.82, 6.69   | 5.00  | 4.58, 5.41   | 4.77  | 4.34, 5.18   | 4.78  | 4.34, 5.22   | 4.66  | 4.09, 5.22   | 4.41  |
| Beverages      | 6.08  | 5.58, 6.58   | 6.72  | 6.02, 7.41   | 6.66  | 6.09, 7.21   | 6.13  | 5.66, 6.58   | 7.52  | 6.87, 8.17   | 7.05  | 6.44, 7.66   | 7.11  | 6.66, 7.55   | 8.02  | 7.41, 8.63   | 9.63  |
| Sweet or salty | 6.08  | 5.35, 6.8    | 4.79  | 4.08, 5.49   | 4.76  | 4.1, 5.41    | 4.23  | 3.66, 4.79   | 4.55  | 3.95, 5.15   | 4.51  | 3.72, 5.29   | 4.26  | 3.67, 4.84   | 5.75  | 4.75, 6.74   | 5.23  |
| Chicken        | 6.98  | 6.45, 7.5    | 8.88  | 8.25, 9.5    | 9.14  | 8.26, 10.01  | 8.03  | 7.57, 8.48   | 8.45  | 7.73, 9.16   | 8.63  | 7.97, 9.29   | 9.71  | 9.02, 10.39  | 10.26 | 9.47, 11.04  | 10.47 |
| Oil            | 5.17  | 4.72, 5.61   | 4.35  | 3.96, 4.72   | 4.52  | 4.14, 4.89   | 4.92  | 4.62, 5.21   | 4.54  | 4.19, 4.87   | 4.26  | 3.9, 4.61    | 3.90  | 3.46, 4.32   | 3.52  | 3.23, 3.81   | 3.49  |
| Vegetables     | 4.71  | 4.38, 5.04   | 4.30  | 4.04, 4.55   | 4.33  | 4.04, 4.62   | 5.00  | 4.73, 5.26   | 4.54  | 4.3, 4.77    | 4.69  | 4.29, 5.07   | 4.49  | 4.17, 4.79   | 4.31  | 3.95, 4.67   | 4.27  |
| Pork           | 4.32  | 3.8, 4.84    | 4.01  | 3.51, 4.5    | 3.99  | 3.62, 4.35   | 3.99  | 3.58, 4.39   | 4.37  | 3.98, 4.75   | 4.07  | 3.46, 4.68   | 3.54  | 3.15, 3.93   | 2.84  | 2.5, 3.18    | 2.98  |
| Grain          | 2.95  | 2.76, 3.13   | 2.87  | 2.64, 3.09   | 2.54  | 2.32, 2.75   | 2.69  | 2.53, 2.84   | 2.68  | 2.47, 2.89   | 2.40  | 2.23, 2.56   | 2.49  | 2.18, 2.79   | 3.02  | 2.8, 3.22    | 3.09  |
| Seafood        | 3.05  | 2.57, 3.52   | 2.33  | 1.8, 2.84    | 2.13  | 1.8, 2.45    | 2.19  | 1.86, 2.51   | 2.26  | 1.81, 2.69   | 2.53  | 1.97, 3.08   | 2.99  | 2.56, 3.41   | 2.05  | 1.54, 2.54   | 2.73  |
| Egg            | 2.60  | 2.41, 2.78   | 2.67  | 2.41, 2.92   | 2.55  | 2.36, 2.74   | 2.90  | 2.68, 3.11   | 2.75  | 2.55, 2.95   | 2.45  | 2.24, 2.65   | 2.46  | 2.3, 2.62    | 2.92  | 2.67, 3.15   | 2.69  |
| Others         | 1.82  | 1.5, 2.13    | 1.90  | 1.52, 2.27   | 1.87  | 1.61, 2.13   | 1.91  | 1.68, 2.14   | 1.98  | 1.68, 2.28   | 2.21  | 1.8, 2.6     | 1.82  | 1.61, 2.02   | 1.81  | 1.62, 1.99   | 1.88  |
| Fruit          | 1.76  | 1.61, 1.91   | 2.19  | 1.97, 2.4    | 2.34  | 2.06, 2.6    | 1.98  | 1.77, 2.17   | 1.82  | 1.6, 2.03    | 2.33  | 2.06, 2.59   | 1.79  | 1.41, 2.15   | 1.77  | 1.62, 1.91   | 1.86  |
| Fastfood       | 0.77  | 0.54, 0.98   | 1.59  | 1.23, 1.93   | 1.88  | 1.33, 2.41   | 2.70  | 2.2, 3.2     | 2.57  | 2.11, 3.02   | 3.69  | 3.03, 4.34   | 3.93  | 3.27, 4.58   | 5.00  | 4.33, 5.65   | 6.60  |
| Seed           | 0.03  | 0, 0.05      | 0.02  | 0, 0.02      | 0.03  | 0.01, 0.04   | 0.02  | 0.01, 0.02   | 0.01  | 0, 0.01      | 0.01  | 0, 0.01      | 0.02  | 0, 0.02      | 0.02  | 0.01, 0.03   | 0.03  |

**Supplementary table 12. Relative contribution of GHGE by food group among households with a completed elementary education, 1989, 2020 ENIGHS.**

| Food group     | 2008         |       | 2010         |       | 2012         |       | 2014         |       | 2016         |       | 2018         |       | 2020         |       | Difference 2020-1989 |       |              |
|----------------|--------------|-------|--------------|-------|--------------|-------|--------------|-------|--------------|-------|--------------|-------|--------------|-------|----------------------|-------|--------------|
|                | 95% CI       | Mean  | 95% CI       | Mean  | 95% CI       | Mean  | 95% CI       | Mean  | 95% CI       | Mean  | 95% CI       | Mean  | 95% CI       |       | 95% CI               |       |              |
| Beef           | 20.07, 21.6  | 21.49 | 20.76, 22.22 | 22.05 | 21.26, 22.84 | 20.57 | 19.25, 21.88 | 17.55 | 16.81, 18.29 | 16.18 | 15.73, 16.62 | 16.27 | 15.83, 16.71 | 16.79 | 16.37, 17.2          | -6.2  | -7.02, -5.38 |
| Dairy          | 13.15, 14.28 | 13.83 | 13.32, 14.33 | 13.58 | 13.02, 14.14 | 13.71 | 12.77, 14.64 | 13.77 | 13.08, 14.45 | 12.83 | 12.47, 13.17 | 12.21 | 11.89, 12.52 | 10.90 | 10.62, 11.18         | -6.84 | -7.58, -6.1  |
| Corn           | 5.72, 6.39   | 5.97  | 5.52, 6.41   | 5.76  | 5.41, 6.1    | 6.01  | 5.46, 6.55   | 6.69  | 6.28, 7.09   | 6.27  | 6.03, 6.5    | 6.31  | 6.08, 6.53   | 6.43  | 6.2, 6.66            | -0.93 | -1.44, -0.42 |
| Legume         | 4.15, 4.66   | 4.77  | 4.47, 5.05   | 4.60  | 4.26, 4.92   | 3.91  | 3.57, 4.25   | 4.80  | 4.48, 5.11   | 4.14  | 3.96, 4.31   | 4.14  | 3.97, 4.29   | 3.89  | 3.74, 4.03           | -1.69 | -2.14, -1.24 |
| Beverages      | 9.06, 10.19  | 9.10  | 8.65, 9.54   | 9.20  | 8.6, 9.79    | 9.44  | 8.74, 10.13  | 9.55  | 9.04, 10.05  | 9.54  | 9.24, 9.84   | 9.30  | 9.02, 9.58   | 9.86  | 9.58, 10.13          | 3.78  | 3.29, 4.27   |
| Sweet or salty | 4.77, 5.67   | 5.32  | 4.71, 5.92   | 5.14  | 4.68, 5.58   | 6.33  | 5.53, 7.11   | 5.81  | 5.25, 6.36   | 5.99  | 5.66, 6.31   | 5.55  | 5.17, 5.92   | 4.75  | 4.49, 4.99           | -1.33 | -1.8, -0.86  |
| Chicken        | 9.94, 10.98  | 10.48 | 10, 10.94    | 9.67  | 9.2, 10.13   | 9.01  | 8.28, 9.72   | 9.48  | 8.99, 9.96   | 10.54 | 10.21, 10.85 | 10.64 | 10.32, 10.94 | 10.06 | 9.78, 10.32          | 3.08  | 2.57, 3.59   |
| Oil            | 3.25, 3.72   | 3.82  | 3.59, 4.03   | 3.87  | 3.63, 4.1    | 2.94  | 2.65, 3.22   | 3.53  | 3.27, 3.77   | 3.43  | 3.29, 3.56   | 3.48  | 3.34, 3.6    | 3.29  | 3.17, 3.41           | -1.88 | -2.31, -1.45 |
| Vegetables     | 3.98, 4.56   | 4.70  | 4.5, 4.9     | 4.74  | 4.49, 4.97   | 4.35  | 3.99, 4.7    | 4.89  | 4.65, 5.12   | 4.89  | 4.74, 5.03   | 4.66  | 4.53, 4.78   | 4.80  | 4.66, 4.93           | 0.09  | -0.33, 0.51  |
| Pork           | 2.71, 3.24   | 2.96  | 2.66, 3.24   | 2.82  | 2.59, 3.04   | 2.80  | 2.41, 3.17   | 2.79  | 2.5, 3.07    | 3.51  | 3.31, 3.71   | 3.92  | 3.7, 4.14    | 4.19  | 3.99, 4.38           | -0.13 | -0.53, 0.27  |
| Grain          | 2.91, 3.27   | 3.24  | 3.08, 3.39   | 3.12  | 2.97, 3.27   | 3.01  | 2.76, 3.25   | 3.26  | 3.08, 3.43   | 3.07  | 2.97, 3.15   | 2.93  | 2.84, 3.02   | 2.71  | 2.62, 2.78           | -0.24 | -0.57, 0.09  |
| Seafood        | 2.23, 3.23   | 2.42  | 2.15, 2.68   | 2.31  | 2.06, 2.55   | 2.27  | 1.84, 2.69   | 2.21  | 1.95, 2.46   | 2.39  | 2.19, 2.58   | 2.22  | 2.06, 2.36   | 2.33  | 2.17, 2.48           | -0.72 | -1.06, -0.38 |
| Egg            | 2.53, 2.85   | 3.15  | 2.99, 3.31   | 3.16  | 3, 3.31      | 2.48  | 2.24, 2.7    | 2.78  | 2.63, 2.93   | 3.01  | 2.9, 3.11    | 3.12  | 3.01, 3.22   | 3.11  | 2.99, 3.21           | 0.51  | 0.19, 0.83   |
| Others         | 1.65, 2.11   | 1.80  | 1.58, 2.01   | 1.93  | 1.65, 2.2    | 1.97  | 1.64, 2.3    | 1.65  | 1.39, 1.9    | 1.79  | 1.63, 1.94   | 1.78  | 1.65, 1.9    | 1.79  | 1.67, 1.89           | -0.03 | -0.29, 0.23  |
| Fruit          | 1.71, 2      | 2.02  | 1.87, 2.16   | 1.84  | 1.67, 1.99   | 1.89  | 1.63, 2.13   | 1.99  | 1.8, 2.17    | 2.03  | 1.92, 2.13   | 1.74  | 1.64, 1.82   | 1.88  | 1.78, 1.97           | 0.12  | -0.14, 0.38  |
| Fastfood       | 6.04, 7.16   | 4.91  | 4.48, 5.33   | 6.19  | 5.61, 6.76   | 9.29  | 8.22, 10.35  | 9.22  | 8.51, 9.91   | 10.36 | 9.91, 10.81  | 11.70 | 11.2, 12.18  | 13.19 | 12.69, 13.67         | 12.42 | 12.14, 12.7  |
| Seed           | 0.01, 0.04   | 0.02  | 0.01, 0.02   | 0.03  | 0.01, 0.03   | 0.03  | 0.01, 0.05   | 0.03  | 0.01, 0.04   | 0.04  | 0.03, 0.04   | 0.04  | 0.03, 0.05   | 0.04  | 0.02, 0.04           | 0.01  | -0.02, 0.04  |



**Supplementary table 13. Relative contribution of GHGE by food group among households with a completed middle school, 1989, 2020 ENIGHS.**

|                | 1989  |             | 1992  |              | 1994  |              | 1996  |              | 1998  |              | 2000  |              | 2002  |              | 2004  |              | 2006  |
|----------------|-------|-------------|-------|--------------|-------|--------------|-------|--------------|-------|--------------|-------|--------------|-------|--------------|-------|--------------|-------|
| Food group     | Mean  | 95% CI      | Mean  | 95% CI       | Mean  | 95% CI       | Mean  | 95% CI       | Mean  | 95% CI       | Mean  | 95% CI       | Mean  | 95% CI       | Mean  | 95% CI       | Mean  |
| Beef           | 26.13 | 24.7, 27.55 | 25.27 | 23.74, 26.78 | 25.40 | 23.99, 26.79 | 23.83 | 22.76, 24.9  | 25.11 | 23.88, 26.34 | 24.50 | 22.89, 26.09 | 25.41 | 24.12, 26.69 | 24.69 | 23.72, 25.65 | 22.49 |
| Dairy          | 20.09 | 18.67, 21.5 | 20.99 | 19.55, 22.43 | 20.42 | 18.96, 21.86 | 18.89 | 17.82, 19.94 | 19.16 | 18, 20.32    | 18.44 | 17, 19.87    | 17.84 | 16.85, 18.81 | 17.45 | 16.5, 18.39  | 16.10 |
| Corn           | 4.89  | 4.24, 5.53  | 4.44  | 3.88, 4.98   | 4.38  | 3.91, 4.83   | 4.72  | 4.34, 5.09   | 4.50  | 4.07, 4.92   | 4.09  | 3.67, 4.5    | 4.08  | 3.76, 4.38   | 3.96  | 3.65, 4.26   | 3.47  |
| Legume         | 3.28  | 2.7, 3.85   | 3.48  | 3, 3.95      | 2.96  | 2.58, 3.32   | 4.29  | 3.86, 4.7    | 3.55  | 3.18, 3.91   | 3.05  | 2.62, 3.46   | 3.03  | 2.75, 3.29   | 2.89  | 2.56, 3.21   | 2.49  |
| Beverages      | 5.81  | 5.08, 6.53  | 6.18  | 5.41, 6.93   | 7.10  | 6.07, 8.12   | 6.18  | 5.56, 6.79   | 7.53  | 6.7, 8.35    | 7.32  | 6.55, 8.08   | 7.73  | 7.09, 8.37   | 8.62  | 8.05, 9.18   | 9.49  |
| Sweet or salty | 7.84  | 6.52, 9.15  | 5.93  | 5.08, 6.78   | 5.90  | 4.88, 6.91   | 5.88  | 5, 6.75      | 5.82  | 4.97, 6.67   | 6.65  | 5.42, 7.88   | 5.48  | 4.42, 6.53   | 6.51  | 5.42, 7.59   | 6.41  |
| Chicken        | 6.71  | 6.06, 7.36  | 8.39  | 7.67, 9.09   | 9.71  | 8.76, 10.65  | 8.30  | 7.68, 8.91   | 7.79  | 7.13, 8.44   | 8.95  | 8.05, 9.83   | 10.12 | 9.46, 10.77  | 9.88  | 9.3, 10.44   | 9.83  |
| Oil            | 3.69  | 3.27, 4.09  | 3.46  | 3.06, 3.85   | 3.51  | 3.06, 3.94   | 4.23  | 3.84, 4.61   | 3.70  | 3.36, 4.03   | 3.63  | 3.26, 4      | 3.30  | 2.87, 3.71   | 2.94  | 2.69, 3.18   | 2.89  |
| Vegetables     | 4.50  | 4.13, 4.85  | 4.19  | 3.81, 4.55   | 4.04  | 3.66, 4.41   | 4.53  | 4.21, 4.83   | 4.24  | 3.98, 4.5    | 3.95  | 3.57, 4.32   | 4.13  | 3.81, 4.45   | 3.89  | 3.61, 4.16   | 3.84  |
| Pork           | 4.34  | 3.7, 4.98   | 3.76  | 3.21, 4.3    | 3.40  | 2.91, 3.88   | 4.19  | 3.6, 4.77    | 4.52  | 4.02, 5.01   | 3.97  | 3.36, 4.57   | 3.14  | 2.69, 3.58   | 2.66  | 2.37, 2.95   | 2.84  |
| Grain          | 2.70  | 2.47, 2.91  | 2.38  | 2.16, 2.59   | 2.20  | 1.96, 2.43   | 2.46  | 2.26, 2.64   | 2.10  | 1.95, 2.23   | 1.97  | 1.81, 2.11   | 2.34  | 2.1, 2.57    | 2.55  | 2.4, 2.69    | 2.32  |
| Seafood        | 2.96  | 2.39, 3.51  | 2.43  | 1.83, 3.03   | 2.50  | 1.97, 3.02   | 2.08  | 1.72, 2.43   | 2.11  | 1.76, 2.46   | 2.25  | 1.89, 2.61   | 3.03  | 2.63, 3.42   | 1.56  | 1.29, 1.82   | 2.62  |
| Egg            | 2.37  | 2.12, 2.61  | 2.49  | 2.14, 2.83   | 2.16  | 1.97, 2.35   | 2.52  | 2.33, 2.7    | 2.32  | 2.14, 2.49   | 2.23  | 2, 2.45      | 2.31  | 2.13, 2.48   | 2.42  | 2.23, 2.6    | 2.17  |
| Others         | 1.46  | 1.22, 1.69  | 1.97  | 1.17, 2.76   | 1.89  | 1.46, 2.31   | 1.72  | 1.46, 1.98   | 1.98  | 1.68, 2.26   | 2.41  | 1.77, 3.04   | 1.94  | 1.64, 2.23   | 2.00  | 1.76, 2.22   | 1.92  |
| Fruit          | 2.49  | 2.19, 2.78  | 2.30  | 2.02, 2.56   | 2.79  | 2.34, 3.23   | 2.25  | 2.02, 2.47   | 2.07  | 1.79, 2.33   | 2.45  | 2.15, 2.74   | 1.97  | 1.75, 2.17   | 2.13  | 1.87, 2.38   | 2.29  |
| Fastfood       | 0.72  | 0.47, 0.95  | 2.34  | 1.66, 3      | 1.62  | 1.09, 2.14   | 3.92  | 3.18, 4.66   | 3.47  | 2.81, 4.13   | 4.14  | 3.45, 4.83   | 4.15  | 3.53, 4.77   | 5.85  | 5.22, 6.47   | 8.83  |
| Seed           | 0.03  | 0, 0.05     | 0.01  | 0, 0.01      | 0.03  | 0, 0.05      | 0.01  | 0, 0.01      | 0.01  | 0, 0.02      | 0.01  | 0, 0.01      | 0.01  | 0, 0.01      | 0.01  | 0, 0.01      | 0.03  |

**Supplementary table 13. Relative contribution of GHGE by food group among households with a completed middle school, 1989, 2020 ENIGHS.**

| Food group     | 2008         |       | 2010         |       | 2012         |       | 2014         |       | 2016         |       | 2018         |       | 2020         |       | Difference 2020-1989 |       |              |
|----------------|--------------|-------|--------------|-------|--------------|-------|--------------|-------|--------------|-------|--------------|-------|--------------|-------|----------------------|-------|--------------|
|                | 95% CI       | Mean  | 95% CI       | Mean  | 95% CI       | Mean  | 95% CI       | Mean  | 95% CI       | Mean  | 95% CI       | Mean  | 95% CI       |       | 95% CI               |       |              |
| Beef           | 21.29, 23.67 | 23.59 | 22.83, 24.34 | 23.31 | 22.59, 24.01 | 21.02 | 19.82, 22.2  | 19.55 | 18.85, 20.24 | 17.98 | 17.59, 18.35 | 18.42 | 18.02, 18.81 | 18.88 | 18.51, 19.24         | -7.25 | -8.11, -6.39 |
| Dairy          | 15.27, 16.91 | 15.09 | 14.53, 15.63 | 14.81 | 14.24, 15.37 | 14.40 | 13.59, 15.2  | 14.49 | 13.92, 15.05 | 13.97 | 13.67, 14.26 | 13.10 | 12.82, 13.38 | 11.51 | 11.26, 11.74         | -8.58 | -9.36, -7.8  |
| Corn           | 3.16, 3.76   | 4.30  | 4.05, 4.54   | 4.39  | 4.1, 4.66    | 4.48  | 4.11, 4.84   | 4.37  | 4.16, 4.57   | 4.60  | 4.46, 4.73   | 4.68  | 4.52, 4.83   | 4.73  | 4.59, 4.85           | -0.16 | -0.59, 0.27  |
| Legume         | 2.08, 2.89   | 3.02  | 2.83, 3.21   | 2.93  | 2.73, 3.12   | 2.81  | 2.55, 3.06   | 3.27  | 3.07, 3.45   | 3.05  | 2.95, 3.15   | 2.99  | 2.88, 3.08   | 2.84  | 2.74, 2.93           | -0.44 | -0.79, -0.09 |
| Beverages      | 8.73, 10.23  | 9.57  | 9.11, 10.02  | 9.43  | 9, 9.85      | 9.58  | 8.87, 10.29  | 9.41  | 8.98, 9.83   | 9.77  | 9.51, 10.03  | 9.34  | 9.1, 9.57    | 9.83  | 9.61, 10.05          | 4.02  | 3.54, 4.5    |
| Sweet or salty | 5.17, 7.63   | 5.21  | 4.81, 5.6    | 5.62  | 5.16, 6.06   | 6.93  | 5.99, 7.85   | 6.83  | 6.21, 7.43   | 6.12  | 5.81, 6.42   | 5.61  | 5.34, 5.87   | 4.73  | 4.52, 4.94           | -3.11 | -3.63, -2.59 |
| Chicken        | 9.08, 10.57  | 10.65 | 10.2, 11.08  | 9.87  | 9.43, 10.31  | 9.31  | 8.66, 9.95   | 9.29  | 8.87, 9.69   | 10.41 | 10.14, 10.66 | 10.72 | 10.45, 10.97 | 10.46 | 10.22, 10.68         | 3.75  | 3.24, 4.26   |
| Oil            | 2.59, 3.19   | 3.15  | 2.95, 3.34   | 3.10  | 2.92, 3.26   | 2.94  | 2.67, 3.2    | 3.33  | 3.09, 3.57   | 3.16  | 3.06, 3.25   | 3.22  | 3.11, 3.32   | 3.15  | 3.04, 3.26           | -0.54 | -0.91, -0.17 |
| Vegetables     | 3.55, 4.12   | 4.13  | 3.96, 4.29   | 4.41  | 4.21, 4.6    | 4.35  | 3.98, 4.71   | 4.55  | 4.3, 4.8     | 4.42  | 4.3, 4.53    | 4.29  | 4.18, 4.39   | 4.44  | 4.34, 4.54           | -0.06 | -0.47, 0.35  |
| Pork           | 2.44, 3.22   | 2.97  | 2.72, 3.22   | 2.91  | 2.64, 3.16   | 3.12  | 2.69, 3.54   | 2.90  | 2.65, 3.14   | 3.48  | 3.31, 3.63   | 3.90  | 3.73, 4.07   | 4.25  | 4.08, 4.41           | -0.09 | -0.49, 0.31  |
| Grain          | 2.17, 2.46   | 2.71  | 2.59, 2.82   | 2.81  | 2.68, 2.93   | 2.81  | 2.6, 3       | 2.93  | 2.77, 3.07   | 2.83  | 2.76, 2.89   | 2.74  | 2.64, 2.82   | 2.46  | 2.4, 2.52            | -0.24 | -0.56, 0.08  |
| Seafood        | 2.22, 3.01   | 2.50  | 2.24, 2.75   | 2.36  | 2.15, 2.56   | 2.20  | 1.88, 2.51   | 2.17  | 1.94, 2.38   | 2.17  | 2.03, 2.3    | 2.09  | 1.97, 2.21   | 2.12  | 2, 2.23              | -0.84 | -1.17, -0.51 |
| Egg            | 1.96, 2.37   | 2.71  | 2.56, 2.85   | 2.93  | 2.75, 3.1    | 2.07  | 1.91, 2.23   | 2.57  | 2.44, 2.68   | 2.76  | 2.68, 2.83   | 2.93  | 2.83, 3.02   | 2.93  | 2.85, 3              | 0.56  | 0.26, 0.86   |
| Others         | 1.6, 2.22    | 1.93  | 1.66, 2.2    | 1.92  | 1.65, 2.18   | 1.90  | 1.61, 2.17   | 1.82  | 1.62, 2.02   | 1.80  | 1.69, 1.9    | 1.83  | 1.72, 1.93   | 1.96  | 1.84, 2.06           | 0.5   | 0.26, 0.74   |
| Fruit          | 2.03, 2.55   | 2.02  | 1.89, 2.14   | 1.95  | 1.8, 2.09    | 2.22  | 1.86, 2.57   | 1.97  | 1.82, 2.1    | 1.99  | 1.89, 2.09   | 1.85  | 1.76, 1.94   | 1.88  | 1.8, 1.95            | -0.61 | -0.91, -0.31 |
| Fastfood       | 7.85, 9.79   | 6.42  | 5.88, 6.95   | 7.24  | 6.65, 7.82   | 9.80  | 8.79, 10.8   | 10.54 | 9.83, 11.24  | 11.46 | 11.03, 11.87 | 12.25 | 11.84, 12.65 | 13.80 | 13.39, 14.19         | 13.08 | 12.8, 13.36  |
| Seed           | 0.01, 0.04   | 0.02  | 0, 0.03      | 0.02  | 0.01, 0.02   | 0.07  | , 0.02, 0.16 | 0.02  | 0.01, 0.03   | 0.04  | 0.02, 0.04   | 0.03  | 0.02, 0.03   | 0.04  | 0.02, 0.04           | 0.01  | -0.02, 0.04  |

**Supplementary table 14. Relative contribution of GHGE by food group among households with a completed high school, 1989, 2020 ENIGHS.**

|                | 1989  |              | 1992  |              | 1994  |              | 1996  |              | 1998  |              | 2000  |              | 2002  |              | 2004  |              | 2006  |
|----------------|-------|--------------|-------|--------------|-------|--------------|-------|--------------|-------|--------------|-------|--------------|-------|--------------|-------|--------------|-------|
| Food group     | Mean  | 95% CI       | Mean  | 95% CI       | Mean  | 95% CI       | Mean  | 95% CI       | Mean  | 95% CI       | Mean  | 95% CI       | Mean  | 95% CI       | Mean  | 95% CI       | Mean  |
| Beef           | 27.15 | 25.02, 29.27 | 26.66 | 24.47, 28.84 | 28.53 | 26.38, 30.67 | 26.64 | 25.02, 28.25 | 26.72 | 25.1, 28.34  | 26.97 | 24.75, 29.17 | 25.19 | 23.6, 26.77  | 25.12 | 23.68, 26.55 | 22.66 |
| Dairy          | 22.93 | 20.71, 25.14 | 22.72 | 20.57, 24.87 | 21.24 | 19.37, 23.1  | 21.06 | 19.56, 22.56 | 21.47 | 19.87, 23.06 | 18.85 | 17.21, 20.48 | 19.24 | 17.75, 20.72 | 17.63 | 16.56, 18.68 | 17.05 |
| Corn           | 3.62  | 3.08, 4.16   | 3.47  | 2.68, 4.24   | 2.69  | 2.31, 3.07   | 3.79  | 3.24, 4.33   | 3.29  | 2.85, 3.73   | 3.66  | 2.72, 4.58   | 3.33  | 2.69, 3.96   | 3.23  | 2.79, 3.65   | 2.94  |
| Legume         | 2.74  | 2.27, 3.2    | 2.32  | 1.88, 2.76   | 2.61  | 1.56, 3.65   | 2.81  | 2.37, 3.24   | 2.29  | 1.98, 2.59   | 2.34  | 1.87, 2.8    | 1.88  | 1.59, 2.16   | 2.02  | 1.75, 2.28   | 1.53  |
| Beverages      | 5.75  | 4.85, 6.64   | 5.91  | 4.81, 7.01   | 6.68  | 5.63, 7.72   | 6.19  | 5.43, 6.93   | 7.93  | 6.87, 8.98   | 7.54  | 6.6, 8.48    | 8.55  | 7.6, 9.5     | 9.09  | 8.43, 9.75   | 9.97  |
| Sweet or salty | 7.51  | 6.01, 8.99   | 7.00  | 5.13, 8.87   | 5.29  | 4.41, 6.17   | 4.67  | 3.7, 5.63    | 7.18  | 5.66, 8.7    | 5.20  | 4.01, 6.37   | 5.08  | 4.2, 5.95    | 7.00  | 6.18, 7.82   | 6.87  |
| Chicken        | 6.19  | 5.42, 6.95   | 7.58  | 6.53, 8.62   | 8.01  | 7.12, 8.9    | 8.00  | 7.13, 8.86   | 7.34  | 6.52, 8.16   | 7.71  | 6.86, 8.55   | 8.98  | 8.12, 9.83   | 9.36  | 8.63, 10.08  | 9.81  |
| Oil            | 2.93  | 2.47, 3.38   | 3.37  | 2.79, 3.95   | 3.48  | 2.82, 4.13   | 3.56  | 3.13, 3.97   | 2.88  | 2.53, 3.22   | 3.86  | 3.42, 4.28   | 2.69  | 2.22, 3.15   | 2.39  | 2.14, 2.64   | 2.20  |
| Vegetables     | 4.25  | 3.81, 4.68   | 3.62  | 3.21, 4.03   | 4.03  | 3.31, 4.74   | 4.33  | 3.92, 4.74   | 3.57  | 3.22, 3.9    | 3.39  | 2.96, 3.82   | 3.79  | 3.35, 4.21   | 3.61  | 3.34, 3.88   | 3.40  |
| Pork           | 3.72  | 3.07, 4.37   | 2.89  | 2.37, 3.41   | 2.96  | 2.31, 3.6    | 3.19  | 2.72, 3.64   | 3.34  | 2.8, 3.87    | 3.95  | 2.54, 5.34   | 3.10  | 2.44, 3.75   | 2.45  | 2.09, 2.79   | 2.41  |
| Grain          | 2.26  | 1.94, 2.58   | 2.11  | 1.79, 2.42   | 1.81  | 1.67, 1.94   | 2.13  | 1.95, 2.3    | 2.09  | 1.85, 2.33   | 1.93  | 1.75, 2.1    | 2.13  | 1.9, 2.34    | 2.21  | 2.04, 2.36   | 2.33  |
| Seafood        | 3.19  | 2.52, 3.86   | 2.67  | 1.98, 3.35   | 2.71  | 2.13, 3.28   | 2.35  | 1.82, 2.87   | 1.90  | 1.45, 2.33   | 2.89  | 2.12, 3.65   | 3.46  | 2.89, 4.02   | 1.98  | 1.44, 2.51   | 2.64  |
| Egg            | 2.49  | 2.01, 2.97   | 2.39  | 2.04, 2.73   | 1.87  | 1.65, 2.08   | 2.15  | 1.92, 2.37   | 2.17  | 1.82, 2.51   | 2.07  | 1.78, 2.35   | 1.67  | 1.5, 1.84    | 2.23  | 2.03, 2.43   | 2.17  |
| Others         | 1.35  | 1.05, 1.64   | 1.89  | 1.34, 2.43   | 2.19  | 1.77, 2.6    | 2.36  | 1.87, 2.85   | 1.94  | 1.47, 2.39   | 2.10  | 1.51, 2.68   | 2.04  | 1.51, 2.55   | 1.87  | 1.54, 2.18   | 2.31  |
| Fruit          | 2.71  | 2.21, 3.19   | 2.41  | 2.04, 2.76   | 3.22  | 2.75, 3.69   | 2.72  | 2.37, 3.07   | 2.47  | 2.01, 2.92   | 3.01  | 2.57, 3.44   | 2.68  | 2.27, 3.07   | 2.46  | 2.09, 2.82   | 2.77  |
| Fastfood       | 1.18  | 0.65, 1.71   | 2.94  | 1.85, 4.02   | 2.64  | 1.64, 3.64   | 4.02  | 3.09, 4.94   | 3.42  | 2.45, 4.37   | 4.51  | 3.31, 5.7    | 6.18  | 4.84, 7.52   | 7.34  | 6.23, 8.43   | 8.92  |
| Seed           | 0.01  | 0, 0.02      | 0.04  | , 0.02, 0.1  | 0.02  | 0, 0.02      | 0.02  | 0.01, 0.03   | 0.01  | 0, 0.01      | 0.02  | 0, 0.03      | 0.01  | 0, 0.01      | 0.01  | 0, 0.02      | 0.02  |

**Supplementary table 14. Relative contribution of GHGE by food group among households with a completed high school, 1989, 2020 ENIGHS.**

| Food group     | 95% CI      | 2008  | 95% CI       | 2010  | 95% CI       | 2012  | 95% CI       | 2014  | 95% CI       | 2016  | 95% CI       | 2018  | 95% CI       | 2020  | 95% CI       | Difference 2020-1989 |                |
|----------------|-------------|-------|--------------|-------|--------------|-------|--------------|-------|--------------|-------|--------------|-------|--------------|-------|--------------|----------------------|----------------|
|                |             | Mean  |              | Mean  |              | Mean  |              | Mean  |              | Mean  |              | Mean  |              | Mean  |              | Mean                 |                |
| Beef           | 21, 24.32   | 24.33 | 23.17, 25.48 | 23.86 | 22.8, 24.9   | 21.83 | 20.06, 23.6  | 20.26 | 19.28, 21.23 | 18.68 | 18.11, 19.24 | 19.19 | 18.65, 19.73 | 19.79 | 19.26, 20.31 | -7.36                | -8.23, -6.49   |
| Dairy          | 15.49, 18.6 | 15.69 | 14.98, 16.39 | 15.96 | 15.13, 16.79 | 14.87 | 13.14, 16.58 | 15.66 | 14.54, 16.77 | 14.56 | 14.09, 15.02 | 13.90 | 13.45, 14.34 | 11.97 | 11.59, 12.35 | -10.96               | -11.77, -10.15 |
| Corn           | 2.55, 3.32  | 3.16  | 2.91, 3.41   | 3.24  | 2.86, 3.61   | 3.64  | 3.01, 4.26   | 3.17  | 2.95, 3.39   | 3.21  | 3.07, 3.34   | 3.46  | 3.28, 3.62   | 3.48  | 3.35, 3.61   | -0.14                | -0.51, 0.23    |
| Legume         | 1.29, 1.77  | 2.12  | 1.92, 2.3    | 2.21  | 2, 2.42      | 1.55  | 1.31, 1.79   | 2.13  | 1.89, 2.35   | 2.06  | 1.94, 2.18   | 2.07  | 1.95, 2.19   | 2.00  | 1.89, 2.11   | -0.74                | -1.06, -0.42   |
| Beverages      | 9.13, 10.8  | 11.14 | 10.29, 11.99 | 10.26 | 9.61, 10.9   | 11.04 | 9.86, 12.21  | 10.29 | 9.56, 11     | 10.61 | 10.19, 11.02 | 9.91  | 9.54, 10.27  | 10.19 | 9.86, 10.5   | 4.44                 | 3.96, 4.92     |
| Sweet or salty | 5.67, 8.07  | 5.81  | 5.07, 6.54   | 6.40  | 5.66, 7.13   | 7.84  | 6.09, 9.57   | 6.88  | 5.97, 7.78   | 6.26  | 5.81, 6.7    | 6.19  | 5.74, 6.63   | 5.22  | 4.89, 5.53   | -2.29                | -2.8, -1.78    |
| Chicken        | 8.9, 10.71  | 10.10 | 9.49, 10.7   | 9.13  | 8.58, 9.66   | 8.30  | 7.3, 9.29    | 9.13  | 8.54, 9.71   | 10.09 | 9.71, 10.46  | 10.22 | 9.84, 10.59  | 10.16 | 9.86, 10.46  | 3.97                 | 3.48, 4.46     |
| Oil            | 1.9, 2.49   | 2.56  | 2.34, 2.77   | 2.47  | 2.25, 2.67   | 2.64  | 2.24, 3.03   | 2.73  | 2.49, 2.96   | 2.85  | 2.69, 3      | 2.65  | 2.51, 2.78   | 2.58  | 2.46, 2.68   | -0.35                | -0.68, -0.02   |
| Vegetables     | 3.03, 3.77  | 3.76  | 3.49, 4.01   | 3.92  | 3.68, 4.16   | 3.40  | 2.99, 3.81   | 4.30  | 3.92, 4.67   | 3.92  | 3.75, 4.08   | 3.96  | 3.8, 4.1     | 3.90  | 3.78, 4.02   | -0.35                | -0.75, 0.05    |
| Pork           | 1.91, 2.89  | 2.53  | 2.23, 2.82   | 2.92  | 2.57, 3.26   | 2.99  | 2.42, 3.56   | 3.11  | 2.71, 3.51   | 3.30  | 3.04, 3.55   | 3.62  | 3.35, 3.87   | 3.87  | 3.65, 4.07   | 0.15                 | -0.23, 0.53    |
| Grain          | 2.04, 2.62  | 2.46  | 2.3, 2.61    | 2.57  | 2.41, 2.73   | 2.25  | 2.02, 2.48   | 2.41  | 2.25, 2.56   | 2.50  | 2.37, 2.61   | 2.49  | 2.36, 2.62   | 2.19  | 2.11, 2.27   | -0.07                | -0.36, 0.22    |
| Seafood        | 2.08, 3.19  | 2.85  | 2.53, 3.16   | 3.14  | 2.74, 3.54   | 2.33  | 1.82, 2.82   | 2.39  | 2.09, 2.68   | 2.77  | 2.55, 2.98   | 2.43  | 2.24, 2.61   | 2.47  | 2.3, 2.63    | -0.72                | -1.06, -0.38   |
| Egg            | 1.84, 2.48  | 2.36  | 2.07, 2.65   | 2.32  | 2.14, 2.49   | 1.97  | 1.65, 2.28   | 2.24  | 2.04, 2.43   | 2.29  | 2.18, 2.39   | 2.57  | 2.42, 2.7    | 2.54  | 2.43, 2.64   | 0.05                 | -0.26, 0.36    |
| Others         | 1.73, 2.88  | 1.72  | 1.41, 2.03   | 1.57  | 1.31, 1.83   | 2.16  | 1.64, 2.68   | 1.78  | 1.51, 2.04   | 1.69  | 1.54, 1.83   | 1.80  | 1.65, 1.95   | 2.00  | 1.84, 2.15   | 0.65                 | 0.42, 0.88     |
| Fruit          | 2.33, 3.19  | 2.20  | 1.98, 2.42   | 2.15  | 1.94, 2.35   | 2.62  | 2.18, 3.06   | 2.34  | 2.08, 2.58   | 2.28  | 2.13, 2.43   | 2.19  | 2.04, 2.32   | 2.15  | 2.03, 2.26   | -0.56                | -0.88, -0.24   |
| Fastfood       | 7.56, 10.28 | 7.18  | 6, 8.34      | 7.85  | 6.99, 8.7    | 10.54 | 8.78, 12.29  | 11.15 | 10.16, 12.14 | 12.88 | 12.23, 13.53 | 13.32 | 12.71, 13.92 | 15.45 | 14.88, 16.02 | 14.27                | 13.96, 14.58   |
| Seed           | 0, 0.02     | 0.02  | 0, 0.04      | 0.03  | 0.01, 0.03   | 0.02  | 0, 0.02      | 0.03  | 0.01, 0.04   | 0.03  | 0.02, 0.04   | 0.04  | 0.02, 0.05   | 0.03  | 0.02, 0.03   | 0.02                 | 0, 0.04        |

**Supplementary table 15. Relative contribution of GHGE by food group among households with a completed college education, 1989, 2020 ENIGHS.**

|                | 1989  |              | 1992  |              | 1994  |             | 1996  |              | 1998  |              | 2000  |              | 2002  |              | 2004  |              | 2006  |
|----------------|-------|--------------|-------|--------------|-------|-------------|-------|--------------|-------|--------------|-------|--------------|-------|--------------|-------|--------------|-------|
| Food group     | Mean  | 95% CI       | Mean  | 95% CI       | Mean  | 95% CI      | Mean  | 95% CI       | Mean  | 95% CI       | Mean  | 95% CI       | Mean  | 95% CI       | Mean  | 95% CI       | Mean  |
| Beef           | 27.56 | 25.07, 30.04 | 29.94 | 27.22, 32.66 | 28.61 | 26, 31.2    | 27.46 | 25.6, 29.31  | 28.30 | 25.78, 30.81 | 28.16 | 25.35, 30.96 | 26.22 | 22.71, 29.73 | 25.70 | 24.39, 26.99 | 23.38 |
| Dairy          | 24.63 | 22.17, 27.08 | 22.15 | 20.26, 24.03 | 22.14 | 19.76, 24.5 | 21.77 | 20.01, 23.52 | 22.53 | 20.36, 24.69 | 19.47 | 17.58, 21.34 | 19.45 | 17.36, 21.53 | 18.81 | 17.8, 19.8   | 17.88 |
| Corn           | 2.65  | 2.19, 3.1    | 2.25  | 1.73, 2.76   | 2.10  | 1.68, 2.51  | 2.57  | 2.04, 3.08   | 2.52  | 2.1, 2.93    | 2.30  | 1.75, 2.85   | 4.94  | 0.22, 9.64   | 2.01  | 1.81, 2.2    | 2.11  |
| Legume         | 1.72  | 1.32, 2.11   | 1.82  | 1.45, 2.17   | 1.72  | 1.32, 2.11  | 1.78  | 1.4, 2.15    | 1.60  | 1.34, 1.84   | 1.49  | 1.17, 1.8    | 1.28  | 1.01, 1.54   | 1.25  | 1.08, 1.4    | 1.16  |
| Beverages      | 5.86  | 4.7, 7.02    | 6.91  | 5.13, 8.68   | 6.80  | 5.78, 7.82  | 7.17  | 5.86, 8.48   | 7.94  | 6.65, 9.21   | 7.49  | 5.86, 9.11   | 8.81  | 7.24, 10.37  | 9.65  | 9.01, 10.28  | 10.84 |
| Sweet or salty | 8.07  | 6.69, 9.43   | 5.02  | 3.87, 6.17   | 6.70  | 5.13, 8.27  | 6.22  | 4.77, 7.65   | 6.41  | 4.97, 7.84   | 5.95  | 4.31, 7.58   | 6.95  | 5.67, 8.22   | 7.81  | 6.89, 8.72   | 6.67  |
| Chicken        | 6.30  | 5.33, 7.25   | 8.09  | 6.97, 9.2    | 7.59  | 6.41, 8.76  | 7.21  | 6.23, 8.17   | 8.24  | 7.18, 9.29   | 7.36  | 6.6, 8.1     | 7.41  | 6.3, 8.52    | 8.61  | 7.94, 9.27   | 8.29  |
| Oil            | 3.17  | 2.57, 3.76   | 3.15  | 2.57, 3.72   | 3.49  | 3.11, 3.87  | 3.63  | 3.22, 4.04   | 3.07  | 2.68, 3.44   | 3.91  | 3.27, 4.53   | 2.14  | 1.74, 2.54   | 2.28  | 2.04, 2.51   | 2.11  |
| Vegetables     | 3.95  | 3.35, 4.54   | 3.92  | 3.24, 4.58   | 3.32  | 2.96, 3.68  | 4.07  | 3.58, 4.54   | 3.66  | 3.24, 4.07   | 3.64  | 3.14, 4.12   | 3.59  | 3.02, 4.15   | 3.18  | 2.97, 3.38   | 3.42  |
| Pork           | 2.91  | 2.16, 3.66   | 3.14  | 2.23, 4.05   | 2.74  | 2.07, 3.4   | 2.88  | 2.3, 3.45    | 2.74  | 2.2, 3.27    | 2.87  | 2.17, 3.56   | 2.03  | 1.37, 2.69   | 2.37  | 1.77, 2.96   | 2.18  |
| Grain          | 2.28  | 1.73, 2.81   | 1.90  | 1.61, 2.18   | 1.83  | 1.65, 2     | 1.99  | 1.8, 2.16    | 1.73  | 1.55, 1.91   | 1.86  | 1.67, 2.04   | 1.63  | 1.39, 1.85   | 2.26  | 2.07, 2.44   | 2.10  |
| Seafood        | 2.23  | 1.77, 2.68   | 2.45  | 1.83, 3.05   | 3.27  | 2.43, 4.11  | 2.74  | 2.17, 3.3    | 2.17  | 1.68, 2.66   | 3.34  | 2.52, 4.16   | 3.52  | 2.85, 4.17   | 2.35  | 1.96, 2.73   | 3.51  |
| Egg            | 2.17  | 1.73, 2.6    | 2.05  | 1.67, 2.43   | 1.61  | 1.37, 1.85  | 1.80  | 1.61, 1.97   | 1.42  | 1.23, 1.59   | 1.56  | 1.32, 1.78   | 1.43  | 1.14, 1.7    | 1.60  | 1.45, 1.74   | 1.67  |
| Others         | 1.57  | 1.09, 2.05   | 1.64  | 1.24, 2.03   | 2.08  | 1.63, 2.53  | 2.03  | 1.45, 2.59   | 2.16  | 1.66, 2.64   | 2.46  | 1.69, 3.22   | 1.92  | 1.32, 2.51   | 2.13  | 1.75, 2.51   | 1.87  |
| Fruit          | 3.44  | 2.77, 4.1    | 3.34  | 2.57, 4.1    | 3.43  | 2.97, 3.88  | 3.35  | 2.79, 3.9    | 2.48  | 2.18, 2.78   | 3.41  | 2.88, 3.93   | 3.66  | 2.95, 4.35   | 3.18  | 2.89, 3.46   | 3.59  |
| Fastfood       | 1.46  | 0.76, 2.16   | 2.20  | 1.37, 3.01   | 2.53  | 1.42, 3.64  | 3.33  | 2.43, 4.23   | 3.00  | 2.09, 3.91   | 4.71  | 3.38, 6.02   | 5.02  | 3.43, 6.59   | 6.77  | 5.87, 7.66   | 9.12  |
| Seed           | 0.01  | 0, 0.01      | 0.02  | 0, 0.03      | 0.04  | 0.01, 0.05  | 0.02  | 0, 0.02      | 0.02  | 0, 0.03      | 0.04  | 0, 0.07      | 0.02  | 0, 0.03      | 0.05  | 0.02, 0.07   | 0.09  |

**Supplementary table 15. Relative contribution of GHGE by food group among households with a completed college education, 1989, 2020 ENIGHS.**

| Food group     | 2008         |       | 2010         |       | 2012         |       | 2014         |       | 2016         |       | 2018         |       | 2020         |       | Difference 2020-1989 |        |               |
|----------------|--------------|-------|--------------|-------|--------------|-------|--------------|-------|--------------|-------|--------------|-------|--------------|-------|----------------------|--------|---------------|
|                | 95% CI       | Mean  | 95% CI       | Mean  | 95% CI       | Mean  | 95% CI       | Mean  | 95% CI       | Mean  | 95% CI       | Mean  | 95% CI       |       | 95% CI               |        |               |
| Beef           | 22.13, 24.61 | 24.11 | 23.01, 25.19 | 23.56 | 22.53, 24.57 | 23.04 | 21.12, 24.94 | 21.13 | 19.88, 22.37 | 19.78 | 19.08, 20.46 | 20.70 | 20.04, 21.35 | 20.33 | 19.72, 20.92         | -7.23  | -8.1, -6.36   |
| Dairy          | 16.86, 18.89 | 17.50 | 16.66, 18.33 | 16.93 | 16.1, 17.74  | 16.95 | 15.07, 18.82 | 15.52 | 14.6, 16.44  | 14.95 | 14.38, 15.51 | 13.96 | 13.47, 14.43 | 11.80 | 11.38, 12.2          | -12.83 | -13.66, -12.0 |
| Corn           | 1.8, 2.4     | 2.23  | 1.98, 2.46   | 2.43  | 2.13, 2.71   | 2.12  | 1.82, 2.41   | 2.08  | 1.86, 2.29   | 2.24  | 2.06, 2.41   | 2.46  | 2.3, 2.62    | 2.41  | 2.27, 2.55           | -0.24  | -0.56, 0.08   |
| Legume         | 0.99, 1.33   | 1.35  | 1.19, 1.5    | 1.21  | 1.05, 1.37   | 1.22  | 0.97, 1.46   | 1.33  | 1.13, 1.51   | 1.36  | 1.24, 1.47   | 1.29  | 1.2, 1.38    | 1.29  | 1.2, 1.37            | -0.43  | -0.68, -0.18  |
| Beverages      | 9.97, 11.7   | 10.71 | 10.08, 11.33 | 11.11 | 10.31, 11.9  | 11.66 | 10.32, 13    | 11.62 | 10.69, 12.53 | 11.16 | 10.65, 11.65 | 10.42 | 9.95, 10.88  | 10.76 | 10.35, 11.16         | 4.9    | 4.42, 5.38    |
| Sweet or salty | 5.79, 7.53   | 6.47  | 5.7, 7.23    | 6.91  | 6.14, 7.67   | 7.78  | 6.23, 9.32   | 7.12  | 5.84, 8.38   | 7.17  | 6.6, 7.72    | 6.53  | 5.99, 7.06   | 5.74  | 5.29, 6.18           | -2.33  | -2.86, -1.8   |
| Chicken        | 7.63, 8.95   | 9.24  | 8.64, 9.83   | 8.22  | 7.71, 8.73   | 7.31  | 6.19, 8.43   | 8.24  | 7.52, 8.94   | 8.77  | 8.37, 9.16   | 9.08  | 8.7, 9.46    | 9.08  | 8.72, 9.44           | 2.78   | 2.29, 3.27    |
| Oil            | 1.86, 2.35   | 2.28  | 2.07, 2.48   | 2.30  | 2.07, 2.51   | 1.93  | 1.57, 2.29   | 2.39  | 2.15, 2.63   | 2.08  | 1.9, 2.24    | 2.28  | 2.11, 2.44   | 2.12  | 2, 2.24              | -1.05  | -1.39, -0.71  |
| Vegetables     | 3.15, 3.68   | 3.57  | 3.36, 3.77   | 3.81  | 3.58, 4.03   | 3.98  | 3.44, 4.5    | 3.90  | 3.6, 4.19    | 3.83  | 3.65, 4.01   | 3.94  | 3.76, 4.11   | 4.39  | 4.19, 4.58           | 0.44   | 0.05, 0.83    |
| Pork           | 1.84, 2.52   | 2.44  | 2.14, 2.73   | 2.42  | 2.14, 2.68   | 2.17  | 1.65, 2.69   | 2.37  | 2.03, 2.7    | 2.59  | 2.35, 2.81   | 2.76  | 2.51, 3      | 3.05  | 2.8, 3.28            | 0.14   | -0.19, 0.47   |
| Grain          | 1.94, 2.25   | 2.22  | 2.07, 2.35   | 2.35  | 2.07, 2.62   | 2.24  | 1.97, 2.49   | 2.15  | 1.97, 2.32   | 2.21  | 2.1, 2.31    | 2.23  | 2.09, 2.36   | 2.03  | 1.93, 2.12           | -0.25  | -0.54, 0.04   |
| Seafood        | 3.02, 3.99   | 3.14  | 2.81, 3.46   | 4.08  | 3.56, 4.59   | 4.02  | 3.19, 4.84   | 3.01  | 2.66, 3.34   | 3.39  | 3.12, 3.65   | 3.16  | 2.91, 3.41   | 3.23  | 3.02, 3.44           | 1.0    | 0.7, 1.3      |
| Egg            | 1.42, 1.92   | 1.72  | 1.57, 1.86   | 1.88  | 1.64, 2.11   | 1.43  | 1.21, 1.65   | 1.71  | 1.54, 1.87   | 1.92  | 1.79, 2.04   | 2.10  | 1.97, 2.22   | 2.09  | 1.96, 2.2            | -0.08  | -0.37, 0.21   |
| Others         | 1.51, 2.23   | 1.81  | 1.48, 2.12   | 1.78  | 1.49, 2.05   | 2.04  | 1.49, 2.57   | 1.88  | 1.59, 2.16   | 1.85  | 1.65, 2.03   | 1.95  | 1.75, 2.13   | 2.05  | 1.83, 2.25           | 0.48   | 0.23, 0.73    |
| Fruit          | 3.18, 3.99   | 3.38  | 3.14, 3.61   | 3.17  | 2.89, 3.44   | 2.74  | 2.34, 3.13   | 3.21  | 2.87, 3.53   | 3.29  | 3.09, 3.47   | 3.18  | 2.96, 3.38   | 3.01  | 2.84, 3.18           | -0.43  | -0.79, -0.07  |
| Fastfood       | 8.05, 10.19  | 7.82  | 6.61, 9.02   | 7.83  | 7.04, 8.6    | 9.32  | 7.58, 11.05  | 12.30 | 11.18, 13.41 | 13.37 | 12.63, 14.1  | 13.88 | 13.19, 14.57 | 16.57 | 15.86, 17.27         | 15.11  | 14.78, 15.44  |
| Seed           | , 0.01, 0.2  | 0.03  | 0.01, 0.03   | 0.03  | 0.01, 0.04   | 0.05  | 0, 0.09      | 0.05  | 0.03, 0.07   | 0.07  | 0.04, 0.08   | 0.06  | 0.04, 0.08   | 0.06  | 0.03, 0.08           | 0.05   | 0.03, 0.07    |

**Supplementary table 16. Relative contribution of GHGE by food group among households living in rural areas, 1992, 2020 ENIGHS.**

|                | 1992  |              | 1994  |              | 1996  |              | 1998  |              | 2000  |              | 2002  |              | 2004  |              | 2006  |              |
|----------------|-------|--------------|-------|--------------|-------|--------------|-------|--------------|-------|--------------|-------|--------------|-------|--------------|-------|--------------|
| Food group     | Mean  | 95% CI       | Mean  | 95% CI       | Mean  | 95% CI       | Mean  | 95% CI       | Mean  | 95% CI       | Mean  | 95% CI       | Mean  | 95% CI       | Mean  | 95% CI       |
| Beef           | 8.79  | 7.34, 10.22  | 9.49  | 8.46, 10.52  | 10.49 | 9.31, 11.66  | 11.49 | 9.99, 12.98  | 12.58 | 11.1, 14.05  | 15.23 | 13.76, 16.69 | 16.61 | 15.32, 17.9  | 16.69 | 15.2, 18.17  |
| Dairy          | 12.11 | 10.69, 13.51 | 11.56 | 10.41, 12.71 | 11.22 | 10.09, 12.33 | 11.47 | 10.19, 12.74 | 10.87 | 9.86, 11.88  | 11.80 | 10.66, 12.93 | 12.13 | 11.31, 12.95 | 12.54 | 11.76, 13.31 |
| Corn           | 17.29 | 14.95, 19.62 | 15.33 | 13.91, 16.73 | 18.47 | 16.61, 20.32 | 16.90 | 15.21, 18.57 | 15.53 | 13.97, 17.07 | 13.38 | 11.97, 14.77 | 10.89 | 9.68, 12.09  | 9.38  | 8.54, 10.21  |
| Legume         | 11.67 | 10.37, 12.95 | 10.40 | 9.39, 11.4   | 11.63 | 10.54, 12.72 | 10.40 | 9.47, 11.33  | 9.89  | 8.7, 11.06   | 8.76  | 7.67, 9.84   | 7.36  | 6.53, 8.18   | 6.28  | 5.71, 6.84   |
| Beverages      | 9.29  | 7.71, 10.85  | 9.93  | 8.89, 10.97  | 7.47  | 6.45, 8.47   | 8.27  | 7.3, 9.23    | 7.93  | 7.02, 8.82   | 8.39  | 7.27, 9.51   | 8.86  | 7.82, 9.88   | 9.09  | 8.14, 10.02  |
| Sweet or salty | 4.39  | 3.24, 5.54   | 4.76  | 4.11, 5.4    | 3.75  | 3.22, 4.27   | 4.76  | 4.15, 5.36   | 5.03  | 4.22, 5.82   | 5.19  | 4.28, 6.09   | 5.36  | 4.59, 6.11   | 6.03  | 5.05, 6.99   |
| Chicken        | 5.70  | 5.04, 6.35   | 6.35  | 5.67, 7.02   | 6.05  | 5.31, 6.79   | 5.19  | 4.54, 5.84   | 6.82  | 6.05, 7.58   | 7.48  | 6.69, 8.27   | 9.06  | 8.13, 9.98   | 9.52  | 8.76, 10.28  |
| Oil            | 8.22  | 7.34, 9.1    | 8.33  | 7.45, 9.21   | 7.76  | 7.07, 8.45   | 7.50  | 6.74, 8.25   | 6.89  | 6.21, 7.56   | 6.75  | 6.1, 7.38    | 5.54  | 5.12, 5.95   | 4.51  | 4.18, 4.83   |
| Vegetables     | 4.99  | 4.31, 5.65   | 5.09  | 4.56, 5.61   | 5.01  | 4.43, 5.58   | 5.50  | 4.87, 6.13   | 4.73  | 4.27, 5.19   | 4.89  | 4.55, 5.22   | 4.65  | 4.26, 5.02   | 4.90  | 4.28, 5.51   |
| Pork           | 2.85  | 2.23, 3.46   | 3.21  | 2.64, 3.77   | 3.20  | 2.73, 3.66   | 3.56  | 3, 4.11      | 2.89  | 2.39, 3.38   | 2.79  | 1.99, 3.59   | 2.43  | 1.99, 2.86   | 2.58  | 2.21, 2.93   |
| Grain          | 4.40  | 3.9, 4.88    | 3.82  | 3.43, 4.21   | 3.63  | 3.23, 4.03   | 3.80  | 3.35, 4.24   | 3.64  | 2.96, 4.31   | 3.15  | 2.79, 3.49   | 4.05  | 3.66, 4.42   | 4.21  | 3.83, 4.59   |
| Seafood        | 2.18  | 1.34, 3.01   | 2.79  | 1.97, 3.6    | 2.63  | 2.16, 3.1    | 2.38  | 1.71, 3.04   | 3.69  | 2.03, 5.34   | 3.42  | 2.58, 4.24   | 2.36  | 1.76, 2.94   | 3.03  | 2.25, 3.8    |
| Egg            | 2.89  | 2.43, 3.34   | 3.47  | 2.39, 4.53   | 2.79  | 2.47, 3.1    | 3.15  | 2.69, 3.6    | 3.17  | 2.75, 3.59   | 2.88  | 2.59, 3.15   | 3.27  | 2.89, 3.63   | 2.89  | 2.46, 3.32   |
| Others         | 3.53  | 2.8, 4.25    | 3.15  | 2.77, 3.52   | 3.37  | 2.95, 3.78   | 3.21  | 2.66, 3.75   | 2.48  | 2.15, 2.8    | 2.45  | 2.1, 2.79    | 2.25  | 1.94, 2.55   | 2.08  | 1.85, 2.3    |
| Fruit          | 1.27  | 0.98, 1.56   | 1.68  | 1.42, 1.92   | 1.37  | 1.14, 1.6    | 1.37  | 1.13, 1.6    | 1.93  | 1.6, 2.26    | 1.59  | 1.37, 1.79   | 1.70  | 1.44, 1.95   | 2.07  | 1.6, 2.54    |
| Fastfood       | 0.38  | 0.21, 0.54   | 0.59  | 0.4, 0.77    | 1.07  | 0.76, 1.37   | 0.98  | 0.66, 1.28   | 1.91  | 1.48, 2.33   | 1.83  | 1.11, 2.55   | 3.48  | 2.79, 4.16   | 4.16  | 3.35, 4.95   |
| Seed           | 0.06  | 0.02, 0.09   | 0.05  | 0.03, 0.07   | 0.09  | 0.03, 0.13   | 0.07  | 0.02, 0.1    | 0.03  | 0, 0.05      | 0.03  | 0.01, 0.03   | 0.02  | 0.01, 0.02   | 0.04  | 0.02, 0.06   |

**Supplementary table 16. Relative contribution of GHGE by food group among households living in rural areas, 1992, 2020 ENIGHS.**

| Food group     | 2008  |              | 2010  |              | 2012  |              | 2014  |              | 2016  |              | 2018  |              | 2020  |              | Difference 2020-1992 |              |
|----------------|-------|--------------|-------|--------------|-------|--------------|-------|--------------|-------|--------------|-------|--------------|-------|--------------|----------------------|--------------|
|                | Mean  | 95% CI       | Mean  | 95% CI       | Mean  | 95% CI       | Mean  | 95% CI       | Mean  | 95% CI       | Mean  | 95% CI       | Mean  | 95% CI       |                      | 95% CI       |
| Beef           | 15.92 | 14.9, 16.92  | 15.58 | 14.58, 16.56 | 12.26 | 10.91, 13.6  | 11.71 | 10.91, 12.5  | 11.33 | 10.95, 11.69 | 11.70 | 11.32, 12.07 | 12.25 | 11.91, 12.58 | 3.46                 | 2.89, 4.03   |
| Dairy          | 12.34 | 11.57, 13.09 | 11.72 | 10.98, 12.44 | 12.12 | 11.32, 12.91 | 11.89 | 11.1, 12.66  | 12.24 | 11.89, 12.59 | 11.56 | 11.25, 11.86 | 10.55 | 10.29, 10.79 | -1.56                | -2.2, -0.92  |
| Corn           | 10.83 | 9.86, 11.79  | 10.48 | 9.64, 11.31  | 12.49 | 11.14, 13.84 | 12.28 | 11.42, 13.14 | 11.19 | 10.67, 11.69 | 10.89 | 10.42, 11.36 | 10.70 | 10.25, 11.13 | -6.59                | -7.32, -5.86 |
| Legume         | 7.74  | 7.2, 8.28    | 7.38  | 6.75, 8.01   | 6.82  | 6.12, 7.51   | 7.42  | 6.83, 8      | 6.46  | 6.14, 6.77   | 6.18  | 5.9, 6.45    | 5.49  | 5.23, 5.75   | -6.18                | -6.8, -5.56  |
| Beverages      | 8.54  | 7.77, 9.31   | 8.90  | 8.13, 9.65   | 9.28  | 8.39, 10.17  | 8.70  | 8.1, 9.29    | 8.96  | 8.62, 9.3    | 8.56  | 8.28, 8.83   | 9.66  | 9.36, 9.96   | 0.37                 | -0.21, 0.95  |
| Sweet or salty | 4.81  | 4.29, 5.31   | 5.30  | 4.76, 5.84   | 6.85  | 6.08, 7.61   | 6.52  | 5.87, 7.16   | 6.31  | 6.02, 6.59   | 5.96  | 5.68, 6.23   | 5.21  | 4.99, 5.42   | 0.82                 | 0.41, 1.23   |
| Chicken        | 9.91  | 9.23, 10.58  | 9.38  | 8.55, 10.21  | 7.43  | 6.77, 8.08   | 8.24  | 7.63, 8.83   | 9.61  | 9.27, 9.93   | 9.59  | 9.31, 9.86   | 9.30  | 9.04, 9.54   | 3.6                  | 3.13, 4.07   |
| Oil            | 5.22  | 4.86, 5.56   | 5.16  | 4.68, 5.63   | 4.23  | 3.85, 4.61   | 4.55  | 4.13, 4.95   | 3.93  | 3.79, 4.07   | 3.99  | 3.86, 4.11   | 3.68  | 3.58, 3.78   | -4.54                | -5.07, -4.01 |
| Vegetables     | 4.82  | 4.54, 5.08   | 5.31  | 4.91, 5.7    | 4.77  | 4.37, 5.15   | 4.96  | 4.61, 5.31   | 4.99  | 4.83, 5.14   | 4.77  | 4.65, 4.88   | 4.63  | 4.51, 4.73   | -0.36                | -0.79, 0.07  |
| Pork           | 2.49  | 2.07, 2.9    | 2.47  | 2.16, 2.77   | 2.40  | 1.98, 2.81   | 2.17  | 1.81, 2.52   | 2.96  | 2.8, 3.11    | 3.20  | 3.04, 3.35   | 3.61  | 3.44, 3.76   | 0.76                 | 0.43, 1.09   |
| Grain          | 4.19  | 3.86, 4.51   | 4.21  | 3.82, 4.58   | 4.05  | 3.66, 4.43   | 3.91  | 3.64, 4.17   | 3.63  | 3.49, 3.75   | 3.44  | 3.31, 3.55   | 3.00  | 2.9, 3.09    | -1.4                 | -1.8, -1     |
| Seafood        | 3.27  | 2.76, 3.78   | 2.84  | 2.4, 3.27    | 3.40  | 2.5, 4.3     | 2.82  | 2.29, 3.35   | 3.15  | 2.74, 3.55   | 3.04  | 2.75, 3.33   | 2.91  | 2.65, 3.16   | 0.73                 | 0.44, 1.02   |
| Egg            | 3.38  | 3.13, 3.62   | 3.83  | 3.53, 4.11   | 2.79  | 2.55, 3.03   | 2.89  | 2.7, 3.07    | 3.27  | 3.14, 3.4    | 3.20  | 3.09, 3.29   | 3.12  | 3.02, 3.21   | 0.23                 | -0.1, 0.56   |
| Others         | 1.97  | 1.71, 2.21   | 1.93  | 1.67, 2.19   | 2.23  | 1.88, 2.58   | 1.58  | 1.38, 1.76   | 1.63  | 1.54, 1.7    | 1.57  | 1.48, 1.64   | 1.68  | 1.59, 1.76   | -1.85                | -2.2, -1.5   |
| Fruit          | 1.73  | 1.57, 1.87   | 1.64  | 1.41, 1.87   | 1.87  | 1.61, 2.12   | 1.72  | 1.54, 1.89   | 1.87  | 1.76, 1.96   | 1.69  | 1.61, 1.76   | 1.68  | 1.61, 1.75   | 0.41                 | 0.18, 0.64   |
| Fastfood       | 2.83  | 2.46, 3.18   | 3.83  | 3.32, 4.33   | 6.95  | 6.14, 7.74   | 8.61  | 7.69, 9.51   | 8.42  | 7.97, 8.87   | 10.60 | 10.12, 11.08 | 12.49 | 11.99, 12.99 | 12.11                | 11.86, 12.36 |
| Seed           | 0.03  | 0.01, 0.04   | 0.03  | 0.01, 0.04   | 0.05  | 0.02, 0.06   | 0.04  | 0.02, 0.05   | 0.06  | 0.04, 0.06   | 0.06  | 0.04, 0.06   | 0.05  | 0.04, 0.05   | -0.01                | -0.06, 0.04  |



**Supplementary table 17. Relative contribution of GHGE by food group among households living in small areas, 1992, 2020 ENIGHS.**

| Food group     | 1992  |              | 1994  |              | 1996  |              | 1998  |              | 2000  |              | 2002  |              | 2004  |              | 2006  |              |
|----------------|-------|--------------|-------|--------------|-------|--------------|-------|--------------|-------|--------------|-------|--------------|-------|--------------|-------|--------------|
|                | Mean  | 95% CI       | Mean  | 95% CI       | Mean  | 95% CI       | Mean  | 95% CI       | Mean  | 95% CI       | Mean  | 95% CI       | Mean  | 95% CI       | Mean  | 95% CI       |
| Beef           | 16.72 | 14.22, 19.21 | 17.70 | 14.66, 20.73 | 17.57 | 15.32, 19.82 | 17.83 | 15.19, 20.47 | 21.54 | 19.09, 23.99 | 19.73 | 17.06, 22.39 | 19.76 | 16.75, 22.76 | 17.23 | 14.84, 19.61 |
| Dairy          | 17.40 | 15.27, 19.52 | 17.20 | 14.3, 20.1   | 15.03 | 13.11, 16.94 | 16.19 | 14.14, 18.22 | 17.07 | 14.63, 19.5  | 15.45 | 13.45, 17.44 | 14.13 | 11.58, 16.68 | 12.50 | 11.04, 13.96 |
| Corn           | 10.90 | 8.81, 12.98  | 9.25  | 7.81, 10.67  | 11.60 | 9.94, 13.25  | 9.44  | 7.04, 11.83  | 7.50  | 6.18, 8.81   | 8.82  | 6.45, 11.18  | 7.85  | 6.39, 9.29   | 7.71  | 6.61, 8.79   |
| Legume         | 6.74  | 5.47, 8      | 7.81  | 6.1, 9.51    | 8.01  | 7.1, 8.92    | 6.65  | 5.66, 7.64   | 5.49  | 4.64, 6.33   | 5.76  | 5.05, 6.46   | 6.73  | 5.31, 8.14   | 5.95  | 5.16, 6.73   |
| Beverages      | 6.89  | 5.43, 8.33   | 7.34  | 6.04, 8.64   | 6.15  | 5.39, 6.9    | 7.21  | 5.76, 8.65   | 6.01  | 4.86, 7.15   | 6.52  | 5.64, 7.4    | 7.84  | 6.83, 8.84   | 9.04  | 7.34, 10.74  |
| Sweet or salty | 5.30  | 3.77, 6.82   | 4.43  | 3.02, 5.83   | 4.88  | 3.9, 5.85    | 6.43  | 4.94, 7.91   | 4.44  | 3.45, 5.42   | 4.66  | 3.79, 5.51   | 6.34  | 4.56, 8.11   | 6.18  | 4.25, 8.1    |
| Chicken        | 8.18  | 6.55, 9.8    | 8.39  | 6.92, 9.86   | 8.21  | 7.34, 9.07   | 7.85  | 6.85, 8.85   | 9.42  | 8.19, 10.64  | 9.69  | 8.25, 11.12  | 10.14 | 8.17, 12.1   | 11.12 | 9.29, 12.95  |
| Oil            | 5.72  | 4.77, 6.65   | 5.25  | 4.14, 6.36   | 5.54  | 4.85, 6.21   | 4.67  | 4.03, 5.3    | 4.02  | 3.49, 4.53   | 4.46  | 3.92, 4.99   | 3.54  | 2.82, 4.26   | 4.01  | 3.32, 4.69   |
| Vegetables     | 3.90  | 3.23, 4.57   | 4.09  | 3.62, 4.55   | 4.75  | 4.28, 5.21   | 4.51  | 3.88, 5.13   | 4.52  | 3.7, 5.33    | 4.99  | 4.38, 5.58   | 5.26  | 4.54, 5.97   | 4.55  | 3.69, 5.4    |
| Pork           | 4.45  | 3.45, 5.44   | 3.81  | 3.17, 4.44   | 4.57  | 3.56, 5.57   | 4.69  | 3.74, 5.63   | 3.82  | 2.88, 4.76   | 3.74  | 3.14, 4.32   | 3.03  | 2.18, 3.87   | 3.36  | 2.53, 4.18   |
| Grain          | 2.68  | 2.32, 3.03   | 2.60  | 2.19, 3      | 2.62  | 2.28, 2.94   | 2.49  | 2.14, 2.83   | 2.20  | 1.9, 2.5     | 2.69  | 2.17, 3.2    | 2.79  | 2.43, 3.15   | 2.73  | 2.39, 3.06   |
| Seafood        | 2.60  | 1.33, 3.85   | 2.82  | 1.21, 4.43   | 2.63  | 2.05, 3.2    | 2.41  | 1.35, 3.46   | 3.63  | 1.93, 5.32   | 3.14  | 2.44, 3.82   | 2.03  | 1.05, 3.01   | 3.62  | 1.81, 5.42   |
| Egg            | 2.85  | 2.34, 3.36   | 2.24  | 1.91, 2.56   | 2.73  | 2.34, 3.1    | 2.74  | 2.39, 3.07   | 2.62  | 2.3, 2.92    | 2.69  | 2.15, 3.23   | 3.31  | 2.6, 4       | 2.95  | 2.54, 3.35   |
| Others         | 2.14  | 1.59, 2.67   | 2.71  | 2.14, 3.26   | 2.26  | 1.79, 2.72   | 2.33  | 1.62, 3.03   | 1.87  | 1.37, 2.37   | 1.58  | 1.21, 1.94   | 1.68  | 1.34, 2.01   | 1.90  | 1.3, 2.48    |
| Fruit          | 1.86  | 1.31, 2.4    | 2.05  | 1.39, 2.69   | 1.51  | 1.22, 1.78   | 1.49  | 1.24, 1.73   | 2.47  | 1.98, 2.95   | 2.11  | 1.41, 2.8    | 1.93  | 1.49, 2.35   | 1.53  | 1.24, 1.81   |
| Fastfood       | 1.61  | 0.85, 2.35   | 2.27  | 0.8, 3.73    | 1.95  | 1.31, 2.57   | 3.05  | 1.25, 4.84   | 3.36  | 1.49, 5.23   | 3.96  | 2.25, 5.65   | 3.60  | 2.5, 4.69    | 5.57  | 3.86, 7.27   |
| Seed           | 0.07  | , 0.03, 0.18 | 0.02  | 0, 0.03      | 0.02  | 0, 0.02      | 0.02  | 0, 0.04      | 0.01  | 0, 0         | 0.01  | 0, 0.02      | 0.04  | 0, 0.07      | 0.04  | 0.01, 0.05   |

**Supplementary table 17. Relative contribution of GHGE by food group among households living in small areas, 1992, 2020 ENIGHS.**

| Food group     | 2008  |              | 2010  |              | 2012  |              | 2014  |              | 2016  |              | 2018  |              | 2020  |              | Difference 2020-1992 |              |
|----------------|-------|--------------|-------|--------------|-------|--------------|-------|--------------|-------|--------------|-------|--------------|-------|--------------|----------------------|--------------|
|                | Mean  | 95% CI       | Mean  | 95% CI       | Mean  | 95% CI       | Mean  | 95% CI       | Mean  | 95% CI       | Mean  | 95% CI       | Mean  | 95% CI       |                      | 95% CI       |
| Beef           | 19.51 | 18.23, 20.78 | 20.19 | 18.63, 21.73 | 17.57 | 16.04, 19.08 | 15.83 | 14.66, 16.99 | 14.47 | 13.91, 15.03 | 15.16 | 14.47, 15.85 | 15.64 | 15.12, 16.14 | -1.08                | -1.82, -0.34 |
| Dairy          | 14.25 | 13.23, 15.26 | 13.72 | 12.8, 14.64  | 12.77 | 11.58, 13.95 | 13.78 | 12.77, 14.79 | 13.65 | 13.09, 14.21 | 11.76 | 11.28, 12.23 | 10.98 | 10.55, 11.4  | -6.42                | -7.16, -5.68 |
| Corn           | 6.94  | 5.91, 7.95   | 6.93  | 6.11, 7.73   | 6.09  | 4.67, 7.5    | 7.00  | 6.08, 7.91   | 6.23  | 5.89, 6.56   | 5.66  | 5.33, 5.98   | 6.26  | 5.9, 6.61    | -4.64                | -5.24, -4.04 |
| Legume         | 5.00  | 4.53, 5.46   | 5.16  | 4.64, 5.67   | 4.48  | 3.8, 5.14    | 4.97  | 4.49, 5.44   | 4.44  | 4.15, 4.72   | 3.96  | 3.69, 4.22   | 3.94  | 3.63, 4.24   | -2.8                 | -3.28, -2.32 |
| Beverages      | 8.33  | 7.55, 9.11   | 9.03  | 7.9, 10.15   | 8.56  | 7.56, 9.54   | 9.48  | 8.43, 10.52  | 9.42  | 8.99, 9.85   | 8.43  | 8.03, 8.82   | 9.00  | 8.63, 9.35   | 2.11                 | 1.6, 2.62    |
| Sweet or salty | 5.47  | 4.65, 6.28   | 4.92  | 4.38, 5.46   | 6.64  | 5.54, 7.72   | 6.09  | 5.33, 6.84   | 6.15  | 5.74, 6.56   | 5.81  | 5.39, 6.21   | 4.89  | 4.56, 5.21   | -0.41                | -0.85, 0.03  |
| Chicken        | 10.86 | 9.87, 11.85  | 9.86  | 9.06, 10.65  | 9.55  | 8.35, 10.75  | 9.38  | 8.79, 9.96   | 10.65 | 10.18, 11.11 | 11.26 | 10.86, 11.65 | 10.76 | 10.34, 11.18 | 2.58                 | 2.03, 3.13   |
| Oil            | 4.11  | 3.58, 4.62   | 3.99  | 3.68, 4.3    | 3.28  | 2.79, 3.75   | 3.11  | 2.83, 3.37   | 3.20  | 3.02, 3.36   | 3.12  | 2.96, 3.27   | 3.18  | 3, 3.34      | -2.54                | -2.99, -2.09 |
| Vegetables     | 5.03  | 4.62, 5.43   | 5.06  | 4.71, 5.41   | 4.97  | 4.21, 5.72   | 5.17  | 4.7, 5.64    | 5.12  | 4.83, 5.39   | 4.85  | 4.67, 5.02   | 4.93  | 4.7, 5.14    | 1.03                 | 0.64, 1.42   |
| Pork           | 3.38  | 2.72, 4.04   | 3.33  | 2.85, 3.8    | 3.68  | 2.99, 4.37   | 2.91  | 2.51, 3.3    | 3.58  | 3.28, 3.87   | 4.14  | 3.81, 4.46   | 4.50  | 4.23, 4.75   | 0.05                 | -0.36, 0.46  |
| Grain          | 2.93  | 2.68, 3.17   | 3.18  | 2.83, 3.52   | 3.19  | 2.71, 3.66   | 3.01  | 2.71, 3.29   | 3.03  | 2.9, 3.16    | 2.72  | 2.61, 2.81   | 2.55  | 2.41, 2.68   | -0.13                | -0.45, 0.19  |
| Seafood        | 2.91  | 2.14, 3.68   | 2.62  | 2.13, 3.1    | 2.71  | 1.92, 3.5    | 2.67  | 2.04, 3.28   | 2.66  | 2.37, 2.93   | 2.63  | 2.29, 2.95   | 2.67  | 2.34, 2.98   | 0.07                 | -0.25, 0.39  |
| Egg            | 2.92  | 2.64, 3.18   | 3.00  | 2.73, 3.26   | 2.23  | 1.94, 2.5    | 2.49  | 2.27, 2.69   | 2.76  | 2.62, 2.89   | 2.80  | 2.62, 2.96   | 2.87  | 2.75, 2.98   | 0.02                 | -0.31, 0.35  |
| Others         | 1.32  | 1.09, 1.54   | 1.61  | 1.32, 1.88   | 1.62  | 1.21, 2.03   | 1.37  | 1.15, 1.57   | 1.58  | 1.4, 1.76    | 1.51  | 1.36, 1.65   | 1.73  | 1.55, 1.9    | -0.41                | -0.69, -0.13 |
| Fruit          | 1.71  | 1.52, 1.9    | 1.69  | 1.47, 1.89   | 1.88  | 1.41, 2.35   | 2.01  | 1.72, 2.3    | 1.90  | 1.77, 2.02   | 1.73  | 1.63, 1.83   | 1.72  | 1.59, 1.85   | -0.14                | -0.41, 0.13  |
| Fastfood       | 5.28  | 4.15, 6.41   | 5.66  | 4.87, 6.45   | 10.65 | 8.9, 12.4    | 10.68 | 9.13, 12.22  | 11.10 | 10.44, 11.76 | 14.43 | 13.54, 15.31 | 14.36 | 13.62, 15.09 | 12.75                | 12.42, 13.08 |
| Seed           | 0.03  | 0, 0.05      | 0.05  | 0.02, 0.06   | 0.13  | , 0.06, 0.32 | 0.05  | 0.01, 0.09   | 0.04  | 0.03, 0.05   | 0.05  | 0.03, 0.05   | 0.04  | 0.02, 0.04   | -0.03                | -0.08, 0.02  |

**Supplementary table 18. Relative contribution of GHGE by food group among households living in medium areas, 1992, 2020 ENIGHS.**

| Food group     | 1992  |              | 1994  |              | 1996  |              | 1998  |              | 2000  |              | 2002  |              | 2004  |              | 2006  |              |
|----------------|-------|--------------|-------|--------------|-------|--------------|-------|--------------|-------|--------------|-------|--------------|-------|--------------|-------|--------------|
|                | Mean  | 95% CI       | Mean  | 95% CI       | Mean  | 95% CI       | Mean  | 95% CI       | Mean  | 95% CI       | Mean  | 95% CI       | Mean  | 95% CI       | Mean  | 95% CI       |
| Beef           | 20.21 | 17.28, 23.14 | 22.61 | 20.6, 24.61  | 20.29 | 18.66, 21.91 | 24.22 | 21.99, 26.43 | 23.22 | 21.56, 24.87 | 25.47 | 23.83, 27.09 | 21.81 | 20.81, 22.81 | 22.40 | 21.21, 23.59 |
| Dairy          | 19.43 | 17.84, 21.01 | 18.56 | 16.32, 20.79 | 17.72 | 16.08, 19.34 | 16.84 | 14.69, 18.98 | 16.62 | 15.19, 18.04 | 15.81 | 14.64, 16.97 | 15.92 | 14.93, 16.91 | 15.24 | 14.16, 16.31 |
| Corn           | 7.55  | 5.44, 9.64   | 6.44  | 5.18, 7.69   | 7.34  | 6.13, 8.53   | 5.98  | 5.18, 6.78   | 5.45  | 4.52, 6.36   | 5.42  | 4.75, 6.07   | 5.60  | 5.02, 6.16   | 4.44  | 4.09, 4.77   |
| Legume         | 7.14  | 5.58, 8.69   | 4.93  | 4.07, 5.77   | 6.67  | 6.03, 7.3    | 5.57  | 4.41, 6.72   | 4.43  | 3.88, 4.97   | 4.28  | 3.82, 4.72   | 4.51  | 4.07, 4.95   | 3.32  | 2.97, 3.66   |
| Beverages      | 5.36  | 4.26, 6.45   | 6.85  | 5.52, 8.17   | 6.26  | 5.51, 7.01   | 8.10  | 6.83, 9.35   | 7.76  | 6.14, 9.37   | 8.42  | 7.72, 9.1    | 9.45  | 8.78, 10.11  | 9.70  | 8.97, 10.43  |
| Sweet or salty | 4.94  | 3.48, 6.39   | 5.75  | 4.31, 7.19   | 5.11  | 3.93, 6.28   | 4.86  | 4.03, 5.68   | 5.48  | 4.35, 6.61   | 4.83  | 4.07, 5.58   | 5.29  | 4.68, 5.88   | 4.75  | 4.17, 5.33   |
| Chicken        | 7.08  | 6.18, 7.96   | 8.92  | 8.04, 9.79   | 8.24  | 6.89, 9.58   | 8.11  | 6.37, 9.85   | 8.43  | 7.61, 9.24   | 9.34  | 8.3, 10.36   | 9.75  | 9.07, 10.43  | 10.61 | 9.82, 11.4   |
| Oil            | 4.93  | 4.1, 5.75    | 4.70  | 4.19, 5.19   | 4.56  | 4.01, 5.1    | 3.66  | 3.1, 4.21    | 3.77  | 3.35, 4.18   | 3.47  | 3.1, 3.84    | 3.29  | 2.98, 3.59   | 2.95  | 2.75, 3.14   |
| Vegetables     | 4.34  | 3.7, 4.96    | 4.30  | 3.65, 4.94   | 4.85  | 4.01, 5.67   | 4.11  | 3.64, 4.58   | 3.96  | 3.37, 4.54   | 4.32  | 3.89, 4.75   | 3.84  | 3.39, 4.29   | 3.86  | 3.47, 4.25   |
| Pork           | 4.79  | 3.89, 5.69   | 3.78  | 3.08, 4.48   | 4.35  | 3.88, 4.81   | 4.31  | 3.65, 4.97   | 5.14  | 3.7, 6.58    | 3.10  | 2.65, 3.54   | 3.20  | 2.71, 3.68   | 3.08  | 2.71, 3.44   |
| Grain          | 2.57  | 2.11, 3.02   | 2.24  | 2.02, 2.45   | 2.43  | 2.22, 2.63   | 2.37  | 2.01, 2.71   | 1.96  | 1.77, 2.14   | 2.15  | 2.01, 2.28   | 2.46  | 2.28, 2.64   | 2.42  | 2.28, 2.55   |
| Seafood        | 3.14  | 2.21, 4.05   | 2.15  | 1.51, 2.77   | 2.56  | 1.72, 3.38   | 2.25  | 1.62, 2.87   | 2.91  | 2.26, 3.55   | 2.79  | 2.32, 3.25   | 2.27  | 1.82, 2.72   | 2.76  | 2.35, 3.16   |
| Egg            | 2.86  | 2.46, 3.25   | 2.45  | 2.2, 2.7     | 2.68  | 2.49, 2.87   | 2.71  | 2.36, 3.05   | 2.26  | 2.06, 2.46   | 2.30  | 2.07, 2.52   | 2.53  | 2.28, 2.78   | 2.46  | 2.25, 2.67   |
| Others         | 1.53  | 1.17, 1.88   | 1.97  | 1.44, 2.48   | 1.91  | 1.58, 2.23   | 2.35  | 1.76, 2.94   | 2.12  | 1.69, 2.53   | 1.61  | 1.32, 1.89   | 1.61  | 1.37, 1.85   | 1.61  | 1.38, 1.84   |
| Fruit          | 1.99  | 1.6, 2.38    | 2.78  | 2.14, 3.41   | 1.99  | 1.71, 2.26   | 1.68  | 1.38, 1.97   | 2.17  | 1.85, 2.47   | 1.84  | 1.5, 2.17    | 1.51  | 1.35, 1.65   | 2.04  | 1.83, 2.24   |
| Fastfood       | 2.14  | 0.97, 3.3    | 1.54  | 0.86, 2.21   | 3.02  | 2.33, 3.69   | 2.86  | 1.95, 3.75   | 4.31  | 3.41, 5.2    | 4.84  | 3.72, 5.95   | 6.93  | 5.87, 7.98   | 8.30  | 7.22, 9.38   |
| Seed           | 0.01  | 0, 0.02      | 0.02  | 0.01, 0.03   | 0.02  | 0.01, 0.02   | 0.01  | 0, 0.01      | 0.01  | 0, 0.01      | 0.02  | 0, 0.02      | 0.02  | 0, 0.02      | 0.03  | 0, 0.06      |

**Supplementary table 18. Relative contribution of GHGE by food group among households living in medium areas, 1992, 2020 ENIGHS.**

| Food group     | 2008  |              | 2010  |              | 2012  |              | 2014  |              | 2016  |              | 2018  |              | 2020  |              | Difference 2020-1992 |              |
|----------------|-------|--------------|-------|--------------|-------|--------------|-------|--------------|-------|--------------|-------|--------------|-------|--------------|----------------------|--------------|
|                | Mean  | 95% CI       | Mean  | 95% CI       | Mean  | 95% CI       | Mean  | 95% CI       | Mean  | 95% CI       | Mean  | 95% CI       | Mean  | 95% CI       |                      | 95% CI       |
| Beef           | 22.15 | 21.08, 23.22 | 22.80 | 21.94, 23.64 | 19.38 | 18.07, 20.67 | 18.13 | 17.01, 19.23 | 17.37 | 16.77, 17.97 | 17.48 | 16.84, 18.12 | 18.33 | 17.75, 18.9  | -1.88                | -2.67, -1.09 |
| Dairy          | 14.64 | 13.88, 15.38 | 14.36 | 13.65, 15.07 | 13.76 | 12.53, 14.98 | 14.09 | 13.27, 14.9  | 13.17 | 12.69, 13.63 | 12.50 | 12.11, 12.87 | 11.12 | 10.73, 11.5  | -8.31                | -9.08, -7.54 |
| Corn           | 4.77  | 4.48, 5.05   | 5.07  | 4.71, 5.42   | 4.95  | 4.38, 5.52   | 4.82  | 4.32, 5.31   | 4.54  | 4.31, 4.76   | 4.61  | 4.35, 4.86   | 4.36  | 4.17, 4.55   | -3.19                | -3.7, -2.68  |
| Legume         | 3.84  | 3.53, 4.14   | 3.79  | 3.44, 4.13   | 3.48  | 2.95, 4      | 3.72  | 3.31, 4.12   | 3.36  | 3.11, 3.6    | 3.14  | 2.97, 3.31   | 2.90  | 2.72, 3.07   | -4.24                | -4.73, -3.75 |
| Beverages      | 9.93  | 9.32, 10.53  | 9.23  | 8.66, 9.8    | 9.59  | 8.58, 10.59  | 9.47  | 8.8, 10.14   | 10.17 | 9.73, 10.59  | 9.91  | 9.53, 10.28  | 10.15 | 9.78, 10.51  | 4.79                 | 4.33, 5.25   |
| Sweet or salty | 5.27  | 4.68, 5.85   | 5.23  | 4.74, 5.72   | 6.55  | 5.37, 7.72   | 6.42  | 5.69, 7.13   | 5.85  | 5.45, 6.24   | 5.41  | 4.97, 5.85   | 4.88  | 4.53, 5.22   | -0.06                | -0.49, 0.37  |
| Chicken        | 10.54 | 9.96, 11.12  | 9.90  | 9.32, 10.46  | 9.78  | 8.78, 10.77  | 9.39  | 8.66, 10.11  | 10.14 | 9.74, 10.53  | 10.78 | 10.35, 11.2  | 10.18 | 9.85, 10.5   | 3.1                  | 2.58, 3.62   |
| Oil            | 3.15  | 2.88, 3.41   | 3.06  | 2.82, 3.3    | 2.71  | 2.29, 3.12   | 3.07  | 2.79, 3.33   | 2.99  | 2.82, 3.16   | 2.91  | 2.74, 3.06   | 2.82  | 2.67, 2.96   | -2.11                | -2.53, -1.69 |
| Vegetables     | 4.17  | 3.96, 4.38   | 4.39  | 4, 4.76      | 4.09  | 3.61, 4.55   | 4.67  | 4.25, 5.07   | 4.35  | 4.17, 4.53   | 4.39  | 4.22, 4.55   | 4.37  | 4.19, 4.54   | 0.03                 | -0.37, 0.43  |
| Pork           | 3.25  | 2.92, 3.57   | 3.50  | 3.04, 3.94   | 2.83  | 2.25, 3.39   | 3.19  | 2.73, 3.65   | 3.85  | 3.57, 4.12   | 4.03  | 3.72, 4.32   | 4.38  | 4.11, 4.63   | -0.41                | -0.83, 0.01  |
| Grain          | 2.83  | 2.64, 3      | 2.73  | 2.54, 2.9    | 2.66  | 2.19, 3.11   | 2.65  | 2.42, 2.87   | 2.71  | 2.53, 2.89   | 2.45  | 2.33, 2.56   | 2.37  | 2.26, 2.47   | -0.2                 | -0.51, 0.11  |
| Seafood        | 2.56  | 2.22, 2.89   | 2.56  | 2.19, 2.92   | 2.38  | 1.64, 3.1    | 2.27  | 1.94, 2.59   | 2.52  | 2.28, 2.75   | 2.23  | 2.03, 2.42   | 2.25  | 2.05, 2.43   | -0.89                | -1.23, -0.55 |
| Egg            | 2.95  | 2.68, 3.21   | 2.80  | 2.59, 3      | 2.22  | 1.97, 2.45   | 2.49  | 2.29, 2.68   | 2.57  | 2.45, 2.67   | 2.82  | 2.68, 2.94   | 2.65  | 2.51, 2.78   | -0.21                | -0.54, 0.12  |
| Others         | 1.95  | 1.62, 2.28   | 1.49  | 1.29, 1.68   | 2.08  | 1.6, 2.54    | 1.72  | 1.37, 2.06   | 1.70  | 1.54, 1.85   | 1.61  | 1.46, 1.75   | 1.73  | 1.58, 1.87   | 0.2                  | -0.04, 0.44  |
| Fruit          | 1.78  | 1.62, 1.92   | 1.81  | 1.61, 2      | 1.82  | 1.49, 2.14   | 1.97  | 1.73, 2.2    | 2.07  | 1.92, 2.21   | 1.97  | 1.8, 2.13    | 1.98  | 1.87, 2.08   | -0.01                | -0.29, 0.27  |
| Fastfood       | 6.19  | 5.48, 6.89   | 7.25  | 6.45, 8.05   | 11.72 | 10, 13.43    | 11.91 | 10.38, 13.44 | 12.59 | 11.81, 13.36 | 13.71 | 12.91, 14.5  | 15.48 | 14.77, 16.18 | 13.34                | 12.98, 13.7  |
| Seed           | 0.03  | 0.01, 0.04   | 0.02  | 0.01, 0.03   | 0.03  | 0, 0.06      | 0.03  | 0.01, 0.03   | 0.04  | 0.02, 0.04   | 0.05  | 0.03, 0.06   | 0.04  | 0.02, 0.05   | 0.03                 | 0.01, 0.05   |

**Supplementary table 19. Relative contribution of GHGE by food group among households living in metropolitan areas, 1992, 2020 ENIGHS.**

|                | 1992  |              | 1994  |              | 1996  |              | 1998  |              | 2000  |              | 2002  |              | 2004  |              | 2006  |              |
|----------------|-------|--------------|-------|--------------|-------|--------------|-------|--------------|-------|--------------|-------|--------------|-------|--------------|-------|--------------|
| Food group     | Mean  | 95% CI       | Mean  | 95% CI       | Mean  | 95% CI       | Mean  | 95% CI       | Mean  | 95% CI       | Mean  | 95% CI       | Mean  | 95% CI       | Mean  | 95% CI       |
| Beef           | 26.17 | 25.17, 27.17 | 27.35 | 26.44, 28.24 | 25.68 | 24.94, 26.41 | 25.72 | 24.86, 26.56 | 26.80 | 25.75, 27.83 | 26.66 | 25.85, 27.47 | 25.55 | 25.02, 26.07 | 23.80 | 23.2, 24.38  |
| Dairy          | 19.97 | 19.16, 20.76 | 19.51 | 18.5, 20.5   | 18.69 | 17.98, 19.4  | 19.49 | 18.81, 20.17 | 17.78 | 16.86, 18.69 | 17.89 | 17.23, 18.54 | 17.45 | 17.01, 17.89 | 15.69 | 15.25, 16.13 |
| Corn           | 4.32  | 3.94, 4.68   | 3.72  | 3.41, 4.03   | 4.55  | 4.18, 4.92   | 4.08  | 3.85, 4.29   | 3.53  | 3.28, 3.77   | 3.73  | 3.44, 4.01   | 3.56  | 3.38, 3.73   | 3.32  | 3.16, 3.47   |
| Legume         | 3.83  | 3.43, 4.21   | 3.38  | 3.04, 3.71   | 4.50  | 4.06, 4.92   | 3.52  | 3.31, 3.73   | 2.93  | 2.65, 3.2    | 2.83  | 2.59, 3.05   | 2.58  | 2.44, 2.71   | 2.25  | 2.11, 2.37   |
| Beverages      | 6.86  | 6.37, 7.35   | 7.03  | 6.58, 7.46   | 6.63  | 6.19, 7.06   | 7.97  | 7.48, 8.45   | 7.73  | 7.22, 8.23   | 7.85  | 7.43, 8.26   | 8.87  | 8.59, 9.15   | 10.05 | 9.68, 10.41  |
| Sweet or salty | 5.22  | 4.69, 5.74   | 5.03  | 4.42, 5.62   | 4.42  | 3.97, 4.85   | 5.36  | 4.79, 5.92   | 5.26  | 4.66, 5.85   | 4.99  | 4.44, 5.53   | 6.12  | 5.77, 6.45   | 5.79  | 5.39, 6.18   |
| Chicken        | 9.11  | 8.63, 9.58   | 9.33  | 8.46, 10.19  | 7.96  | 7.6, 8.31    | 8.30  | 7.91, 8.67   | 8.29  | 7.82, 8.76   | 10.03 | 9.58, 10.48  | 9.81  | 9.52, 10.08  | 10.04 | 9.69, 10.37  |
| Oil            | 3.42  | 3.15, 3.69   | 3.58  | 3.32, 3.82   | 4.02  | 3.8, 4.24    | 3.51  | 3.32, 3.69   | 3.94  | 3.7, 4.18    | 2.80  | 2.61, 2.97   | 2.81  | 2.69, 2.93   | 2.51  | 2.38, 2.62   |
| Vegetables     | 4.20  | 3.98, 4.41   | 4.04  | 3.75, 4.33   | 4.82  | 4.61, 5.02   | 4.18  | 4.02, 4.34   | 3.99  | 3.71, 4.26   | 4.04  | 3.85, 4.22   | 3.68  | 3.57, 3.79   | 3.68  | 3.55, 3.8    |
| Pork           | 3.68  | 3.35, 4      | 3.76  | 3.41, 4.1    | 3.48  | 3.2, 3.76    | 3.83  | 3.54, 4.1    | 3.70  | 3.3, 4.1     | 2.90  | 2.63, 3.16   | 2.63  | 2.45, 2.8    | 2.77  | 2.58, 2.95   |
| Grain          | 2.48  | 2.3, 2.64    | 2.09  | 1.98, 2.19   | 2.49  | 2.34, 2.63   | 2.19  | 2.09, 2.28   | 2.13  | 2, 2.25      | 2.13  | 2, 2.24      | 2.46  | 2.37, 2.53   | 2.44  | 2.35, 2.52   |
| Seafood        | 1.99  | 1.76, 2.21   | 2.28  | 2.03, 2.53   | 2.01  | 1.77, 2.25   | 1.93  | 1.7, 2.15    | 2.02  | 1.71, 2.32   | 3.02  | 2.75, 3.27   | 1.68  | 1.51, 1.84   | 2.36  | 2.18, 2.52   |
| Egg            | 2.40  | 2.25, 2.53   | 2.30  | 2.17, 2.43   | 2.67  | 2.51, 2.83   | 2.48  | 2.34, 2.62   | 2.28  | 2.1, 2.46    | 2.20  | 2.07, 2.32   | 2.48  | 2.38, 2.58   | 2.25  | 2.14, 2.35   |
| Others         | 1.76  | 1.47, 2.04   | 1.78  | 1.56, 1.98   | 1.83  | 1.67, 1.99   | 2.00  | 1.79, 2.21   | 2.31  | 1.94, 2.67   | 1.99  | 1.78, 2.19   | 2.06  | 1.9, 2.21    | 1.89  | 1.7, 2.06    |
| Fruit          | 2.51  | 2.33, 2.67   | 2.57  | 2.4, 2.74    | 2.44  | 2.25, 2.62   | 2.17  | 2.01, 2.33   | 2.64  | 2.41, 2.85   | 2.19  | 2.01, 2.37   | 2.27  | 2.15, 2.38   | 2.50  | 2.35, 2.63   |
| Fastfood       | 2.08  | 1.71, 2.44   | 2.23  | 1.88, 2.57   | 3.78  | 3.26, 4.3    | 3.26  | 2.86, 3.65   | 4.65  | 4.12, 5.17   | 4.74  | 4.18, 5.29   | 5.97  | 5.56, 6.37   | 8.64  | 8.13, 9.15   |
| Seed           | 0.01  | 0, 0.01      | 0.02  | 0.01, 0.03   | 0.01  | 0, 0.01      | 0.01  | 0, 0.01      | 0.02  | 0, 0.02      | 0.01  | 0, 0.01      | 0.02  | 0.01, 0.02   | 0.04  | 0.01, 0.06   |

**Supplementary table 19. Relative contribution of GHGE by food group among households living in metropolitan areas, 1992, 2020 ENIGHS.**

| Food group     | 2008  |              | 2010  |              | 2012  |              | 2014  |              | 2016  |              | 2018  |              | 2020  |              | Difference 2020-1992 |              |
|----------------|-------|--------------|-------|--------------|-------|--------------|-------|--------------|-------|--------------|-------|--------------|-------|--------------|----------------------|--------------|
|                | Mean  | 95% CI       | Mean  | 95% CI       | Mean  | 95% CI       | Mean  | 95% CI       | Mean  | 95% CI       | Mean  | 95% CI       | Mean  | 95% CI       |                      | 95% CI       |
| Beef           | 24.38 | 23.88, 24.87 | 24.13 | 23.61, 24.63 | 23.17 | 22.19, 24.14 | 21.24 | 20.65, 21.83 | 19.60 | 19.25, 19.94 | 20.28 | 19.93, 20.63 | 20.39 | 20.04, 20.73 | -5.78                | -6.64, -4.92 |
| Dairy          | 15.06 | 14.7, 15.4   | 15.24 | 14.85, 15.61 | 14.98 | 14.15, 15.81 | 14.82 | 14.27, 15.36 | 13.95 | 13.69, 14.21 | 13.62 | 13.34, 13.88 | 11.59 | 11.36, 11.81 | -8.38                | -9.15, -7.61 |
| Corn           | 3.64  | 3.44, 3.83   | 3.49  | 3.35, 3.62   | 3.27  | 3.01, 3.51   | 3.23  | 3.09, 3.36   | 3.20  | 3.11, 3.28   | 3.26  | 3.16, 3.35   | 3.28  | 3.2, 3.36    | -1.04                | -1.44, -0.64 |
| Legume         | 2.53  | 2.41, 2.65   | 2.45  | 2.33, 2.56   | 2.28  | 2.04, 2.5    | 2.47  | 2.33, 2.6    | 2.16  | 2.08, 2.22   | 2.15  | 2.07, 2.22   | 2.11  | 2.04, 2.17   | -1.72                | -2.09, -1.35 |
| Beverages      | 10.45 | 10.15, 10.75 | 10.18 | 9.84, 10.51  | 10.33 | 9.71, 10.94  | 10.49 | 10.08, 10.88 | 10.65 | 10.4, 10.88  | 10.36 | 10.12, 10.6  | 10.56 | 10.34, 10.77 | 3.7                  | 3.19, 4.21   |
| Sweet or salty | 5.39  | 5.05, 5.72   | 5.75  | 5.41, 6.09   | 6.82  | 6.04, 7.59   | 6.33  | 5.77, 6.87   | 6.11  | 5.84, 6.37   | 5.71  | 5.44, 5.97   | 4.94  | 4.72, 5.15   | -0.28                | -0.72, 0.16  |
| Chicken        | 10.47 | 10.19, 10.74 | 9.39  | 9.12, 9.66   | 8.75  | 8.19, 9.31   | 9.36  | 9, 9.71      | 10.24 | 10.02, 10.46 | 10.07 | 9.83, 10.3   | 10.13 | 9.93, 10.32  | 1.02                 | 0.45, 1.59   |
| Oil            | 2.73  | 2.62, 2.82   | 2.84  | 2.71, 2.96   | 2.52  | 2.31, 2.72   | 2.81  | 2.68, 2.94   | 2.77  | 2.67, 2.85   | 2.77  | 2.67, 2.85   | 2.69  | 2.61, 2.77   | -0.73                | -1.09, -0.37 |
| Vegetables     | 4.12  | 4, 4.23      | 4.14  | 4.02, 4.24   | 4.09  | 3.85, 4.32   | 4.36  | 4.18, 4.52   | 4.13  | 4.03, 4.22   | 4.04  | 3.94, 4.13   | 4.30  | 4.21, 4.39   | 0.1                  | -0.3, 0.5    |
| Pork           | 2.62  | 2.46, 2.76   | 2.63  | 2.48, 2.76   | 2.79  | 2.49, 3.08   | 2.87  | 2.66, 3.08   | 3.17  | 3.03, 3.29   | 3.42  | 3.27, 3.56   | 3.69  | 3.56, 3.82   | 0.01                 | -0.36, 0.38  |
| Grain          | 2.61  | 2.52, 2.68   | 2.62  | 2.51, 2.71   | 2.51  | 2.37, 2.63   | 2.62  | 2.53, 2.71   | 2.55  | 2.48, 2.6    | 2.53  | 2.45, 2.6    | 2.27  | 2.22, 2.32   | -0.21                | -0.52, 0.1   |
| Seafood        | 2.37  | 2.23, 2.49   | 2.65  | 2.47, 2.82   | 2.37  | 2.08, 2.66   | 2.22  | 2.05, 2.38   | 2.43  | 2.31, 2.54   | 2.17  | 2.06, 2.27   | 2.33  | 2.23, 2.42   | 0.34                 | 0.06, 0.62   |
| Egg            | 2.62  | 2.51, 2.72   | 2.70  | 2.58, 2.81   | 2.02  | 1.86, 2.18   | 2.42  | 2.3, 2.52    | 2.52  | 2.45, 2.58   | 2.73  | 2.64, 2.8    | 2.75  | 2.67, 2.82   | 0.35                 | 0.04, 0.66   |
| Others         | 1.90  | 1.74, 2.05   | 2.02  | 1.8, 2.23    | 2.12  | 1.84, 2.39   | 1.90  | 1.74, 2.06   | 1.88  | 1.78, 1.97   | 2.09  | 1.98, 2.19   | 2.11  | 2.01, 2.21   | 0.35                 | 0.09, 0.61   |
| Fruit          | 2.40  | 2.3, 2.49    | 2.31  | 2.2, 2.42    | 2.52  | 2.28, 2.75   | 2.42  | 2.27, 2.56   | 2.44  | 2.35, 2.53   | 2.34  | 2.24, 2.43   | 2.34  | 2.25, 2.41   | -0.17                | -0.48, 0.14  |
| Fastfood       | 6.70  | 6.31, 7.08   | 7.44  | 7.01, 7.86   | 9.43  | 8.58, 10.27  | 10.40 | 9.87, 10.92  | 12.16 | 11.77, 12.55 | 12.43 | 12.04, 12.81 | 14.46 | 14.06, 14.84 | 12.38                | 12.03, 12.73 |
| Seed           | 0.03  | 0.01, 0.04   | 0.02  | 0.01, 0.02   | 0.03  | 0.01, 0.04   | 0.03  | 0.02, 0.03   | 0.04  | 0.03, 0.04   | 0.03  | 0.02, 0.03   | 0.04  | 0.02, 0.04   | 0.03                 | 0.01, 0.05   |

#### References

1. Guzmán, Soria D, Taboada, González P, Aguilar, Virgen Q, Baltierra, Trejo E, Marquez, Benavides L. Environmental impact of corn tortilla production: a case study. *Appl Sci*. 2019;9(22):4852.
2. Your Ethical Guide To Buy Better [Internet]. Disponible en: <https://www.healabel.com>
3. Clune S, Crossin E, Verghese K. Systematic review of greenhouse gas emissions for different fresh food categories. *Eco, Effic Agric Food Syst Sel Pap Addressing Glob Chall Food Syst Those Present Conf "LCA Feed Planet Energy Life"* 6, 8 Oct 2015 Stresa Milan Expo Italy. 1 de enero de 2017;140:766, 83.
4. Vergel, Rangel GA, Escamilla, García PE, Camarillo, López RH, Esquivel, Guzmán JA, Pérez, Soto F. The environmental impact of nopal (*Opuntia ficus, indica*) production in Mexico City, Mexico through a life cycle assessment (LCA). *Environ Dev Sustain*. 2021;1, 28.
